# Supplementary material for: Suramin exposure alters cellular metabolism and mitochondrial energy production in African trypanosomes
Source: PubMed Central journal article supplement (PMC7294092; doi:10.1074/jbc.ra120.012355), 2020-04-30

Supplementary material for:

## **Suramin induces mitochondrial activation in bloodstage African trypanosomes**

Martin Zoltner<sup>1§</sup>, Gustavo Campagnaro<sup>2</sup>, Gergana Taleva<sup>3</sup>, Alana Burrell<sup>4</sup>, Michela Cerone<sup>2</sup>, Ka-Fai Leung<sup>5</sup>, Fiona Achcar<sup>6</sup>, David Horn<sup>1</sup>, Sue Vaughan<sup>4</sup>, Catarina Gadelha<sup>7</sup>, Alena Zíková<sup>3</sup>, Michael P. Barrett<sup>6</sup>, Harry P. de Koning<sup>2</sup> and Mark C. Field<sup>1\*</sup>

### **Supplementary figure legends**

**Figure S1: Summary of metabolite changes of cells grown in the presence <sup>13</sup>C-labeled glucose one day after suramin exposure.**

**Figure S2: Amino acid level changes upon suramin treatment.** -log<sub>10</sub> fold changes of amino acids detected in the metabolomics are plotted versus the 3 time points analyzed.

**Figure S3: Suramin induced proteome changes have an onset later than 24 hours.** Correlation of proteome changes upon suramin treatment after 24 hours and 48 hours. The correlation plot uses the respective normalised SILAC ratio, averaged from triplicate experiments.

**Figure S4: GO term analysis.** Volcano plots of normalised SILAC ratio after 48 hours suramin (35 nM) exposure. -log<sub>2</sub> transformed average ratios from triplicate experiments, are plotted against the respective -log<sub>10</sub> transformed p-values. Data points are colored for indicated GO terms. Selected data points are annotated.

**Figure S5: Correlation of proteome changes upon suramin treatment with proteome differences between BSF and PCF.** -log<sub>2</sub> transformed abundance shifts after 48 hours suramin (35 nM) exposure, were plotted against corresponding -log<sub>2</sub> transformed abundance differences between BSF and PCF (50). Selected GO terms are color indicated. Infinite changes were omitted for clarity. (DH = dehydrogenase, PPDK = pyruvate phosphate dikinase).

**Figure S6: Suramin binding to serum proteins.** Gel filtration chromatogram of 0.5 ml foetal bovine serum pre-incubated with  $^3\text{H}$ -suramin on a 24 ml Superdex 200 column. The black line indicates the relative absorbance at  $\lambda=280$  nm and the red line the scintillation count (counts per minute (CPM)) of respective fractions.

**Figure S7: Pyruvate transporter overexpression has no effect on suramin sensitivity.** Pt1-myc overexpression was detected by western blotting using the myc epitope (A), but did not change potency ( $\text{EC}_{50}$ ) of suramin (B).

**Movie S1: 3D segmentation of whole *T. brucei* cell.** Plasma membrane and flagellum (purple), glycosomes (orange).

**Table S1: High confidence metabolite changes of cells grown in the presence  $^{13}\text{C}$ -labeled glucose one day after suramin exposure** List of 84 quantified metabolites with the respective  $\log_2$  fold change and corresponding  $p$ -value

**Table S2: Metabolomics analysis at different time points of suramin exposure.**

**Table S3: High confidence metabolite changes at different time points of suramin exposure** List of 65 quantified metabolites.

**Table S4: SILAC proteomics analysis after 24 hours and 48 hours suramin exposure.**

# (R)-Lactate

Formula: C<sub>3</sub>H<sub>6</sub>O<sub>3</sub> Mass: 90.032 Std.RT: 552.6 Ion: NEG

# G1

■ UL ■ +1 ■ +2 ■ +3

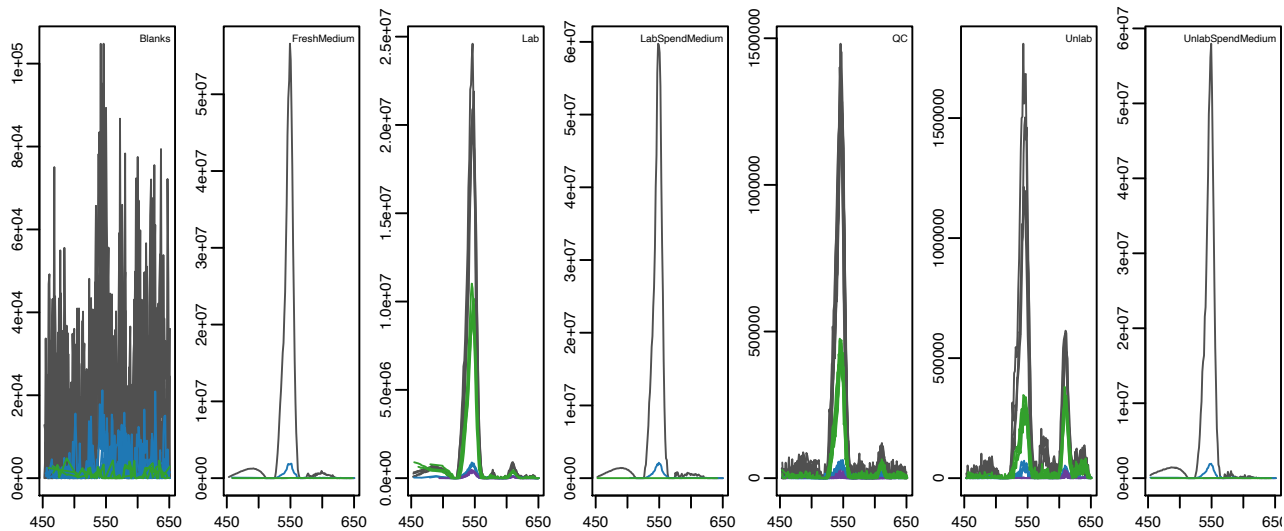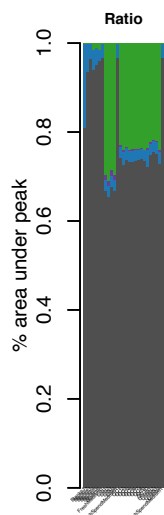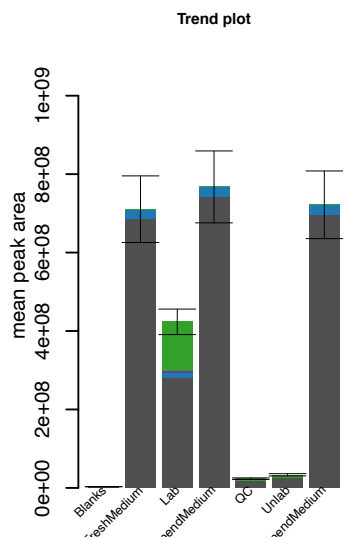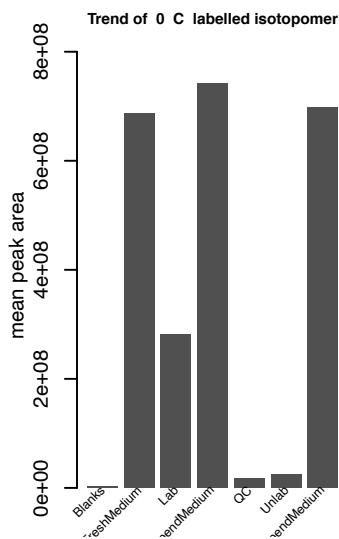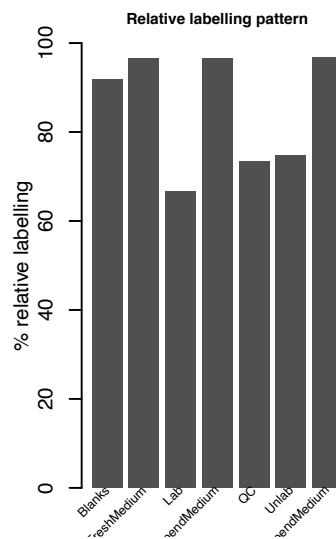

# (S)-Malate

Formula: C<sub>4</sub>H<sub>6</sub>O<sub>5</sub> Mass: 134.022 Std.RT: 777 Ion: NEG

# G1

■UL ■+1 ■+2 ■+3 ■+4

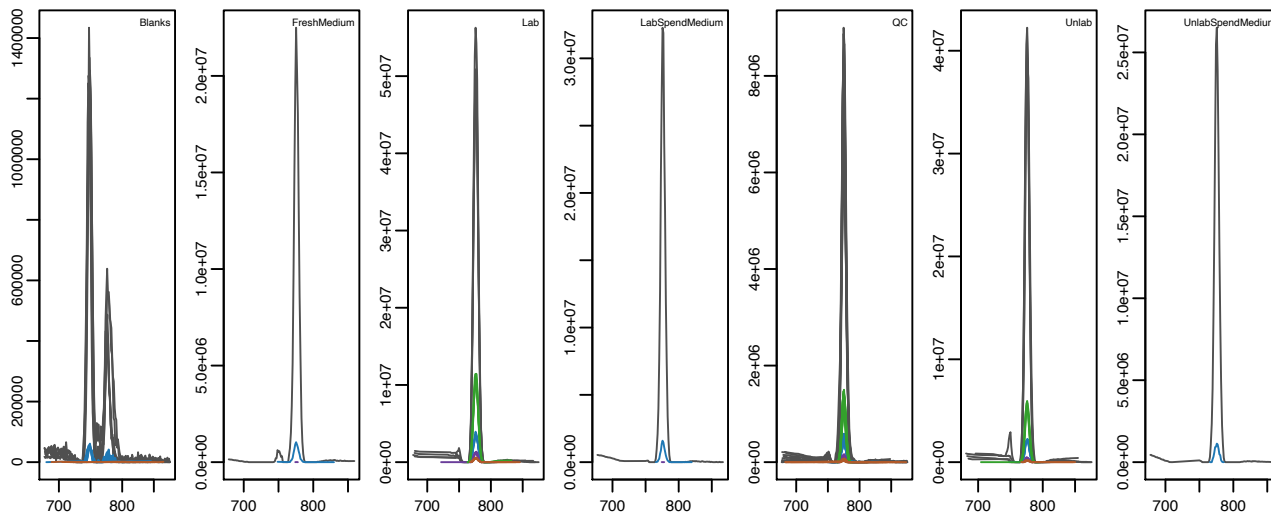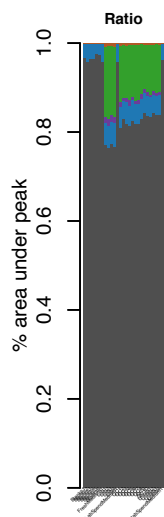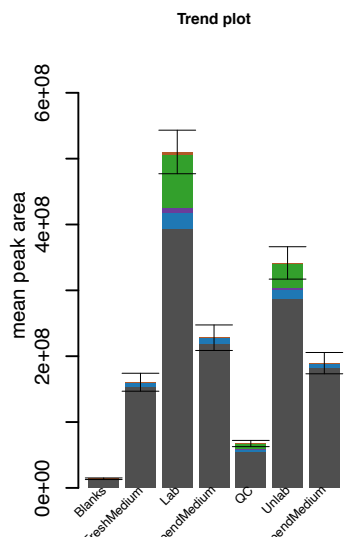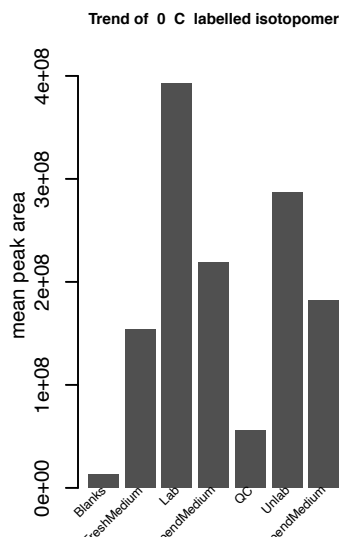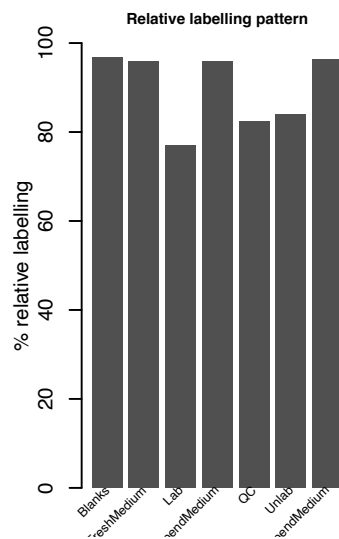

# 2-phospho-D-glycerate

Formula: C3H7O7P Mass: 185.993 Std.RT: 783 Ion: NEG

# G1

■UL ■+1 ■+2 ■+3

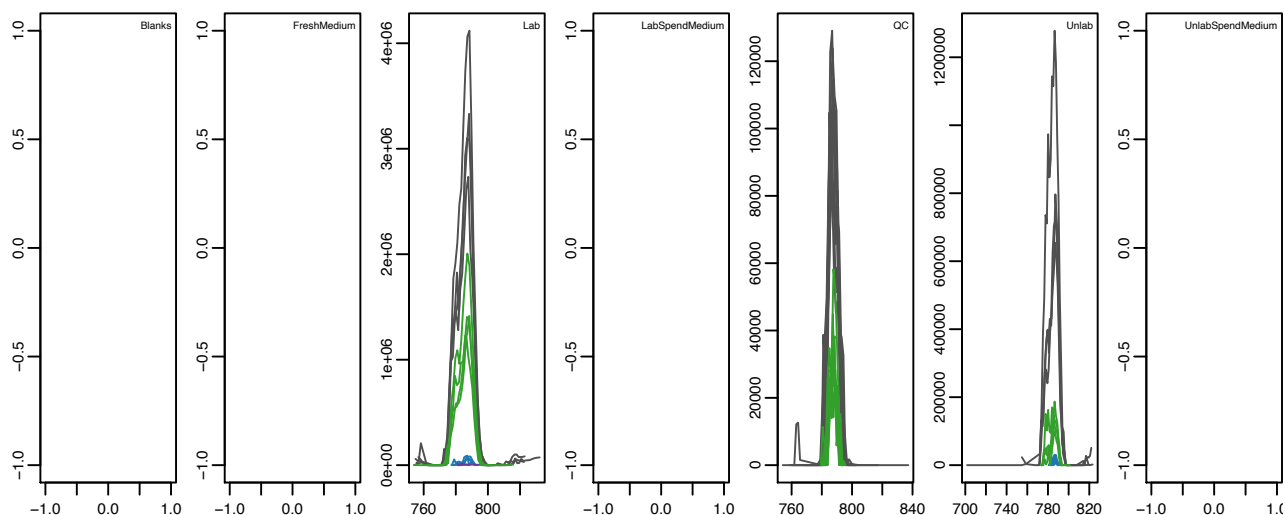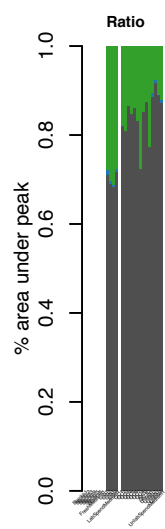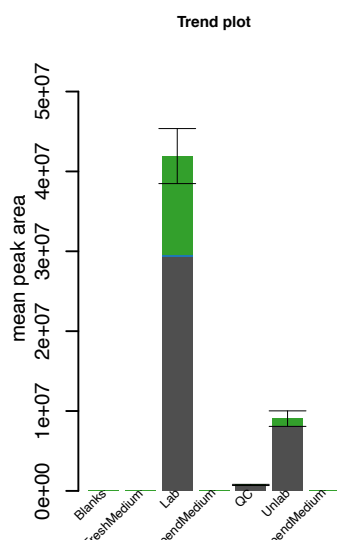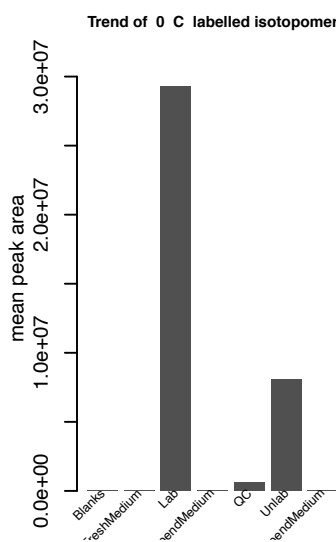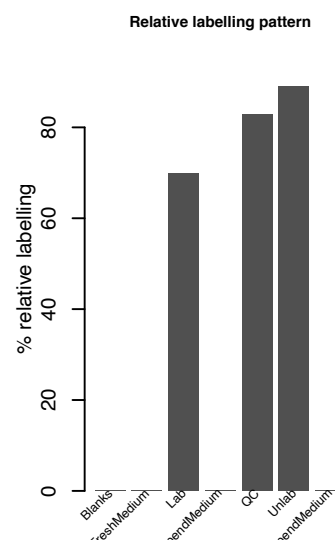

# 3'\_5'-Cyclic AMP

Formula: C<sub>10</sub>H<sub>12</sub>N<sub>5</sub>O<sub>6</sub>P Mass: 329.053 Std.RT: 526.8 Ion: NEG

# G1

■ UL ■ +1 ■ +2 ■ +3 ■ +4 ■ +5 ■ +6 ■ +7 ■ +8 ■ +9 ■ +10

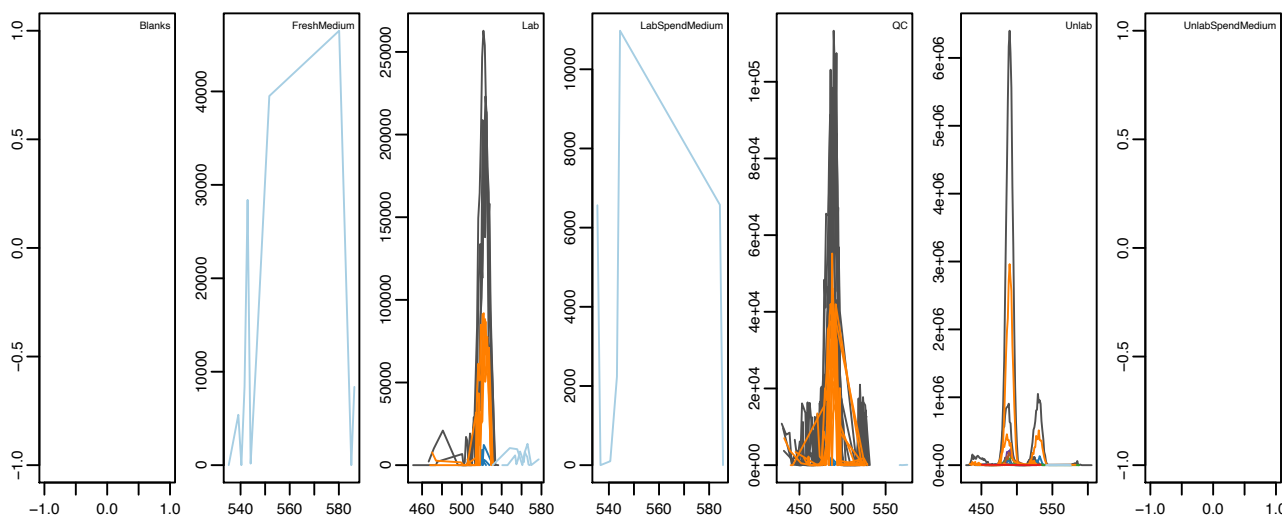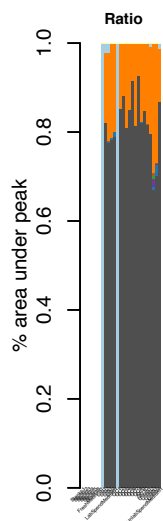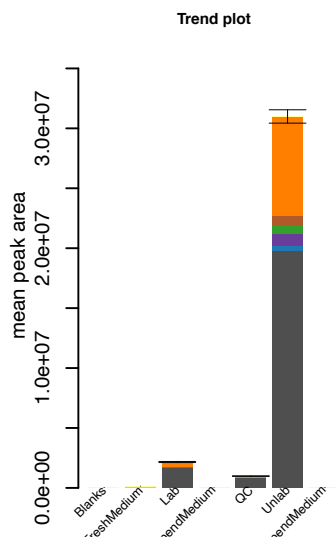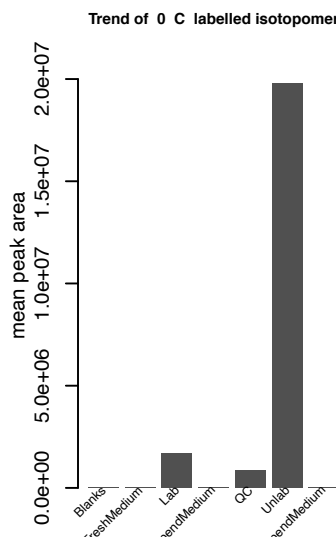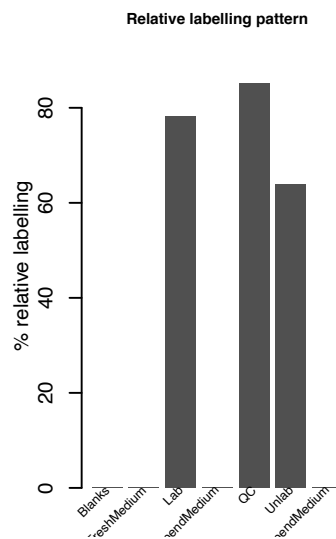

# 3-Phospho-D-glycerate

Formula: C3H7O7P Mass: 185.993 Std.RT: 788.4 Ion: NEG

# G1

■ UL ■ +1 ■ +2 ■ +3

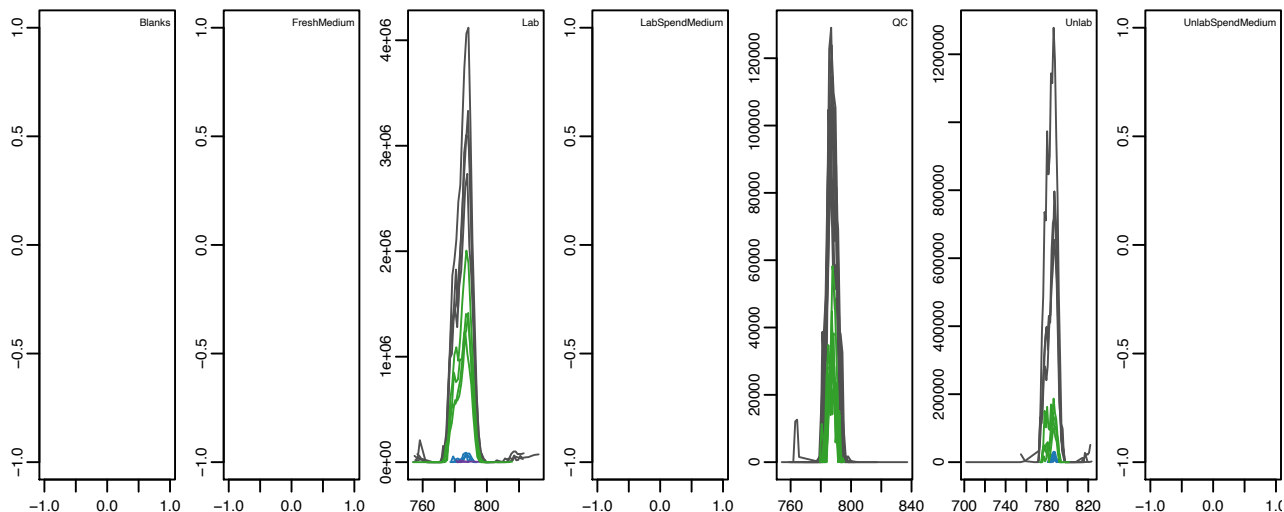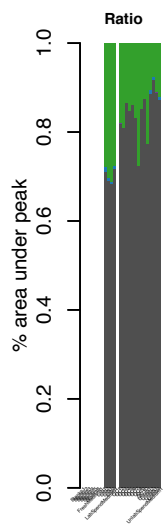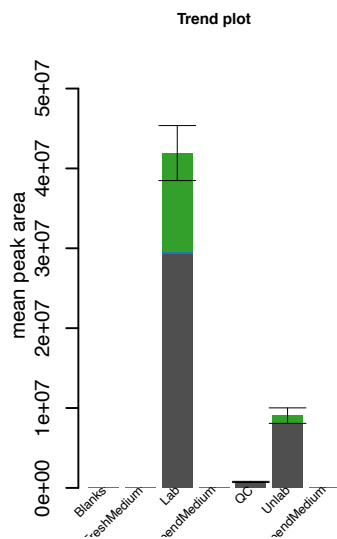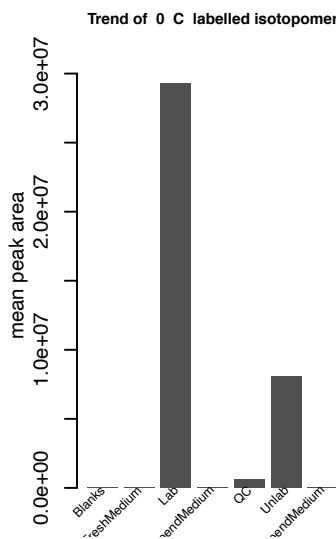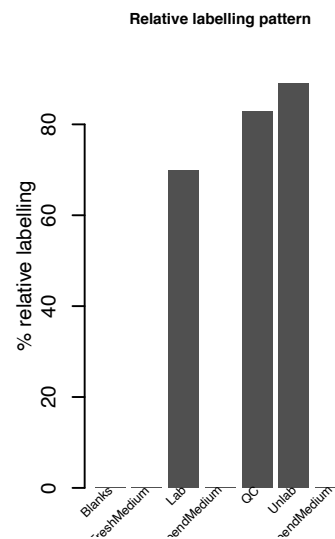

# ADP

Formula: C<sub>10</sub>H<sub>15</sub>N<sub>5</sub>O<sub>10</sub>P<sub>2</sub> Mass: 427.029 Std.RT: 714 Ion: NEG

# G1

■UL ■+1 ■+2 ■+3 ■+4 ■+5 ■+6 ■+7 ■+8 ■+9 ■+10

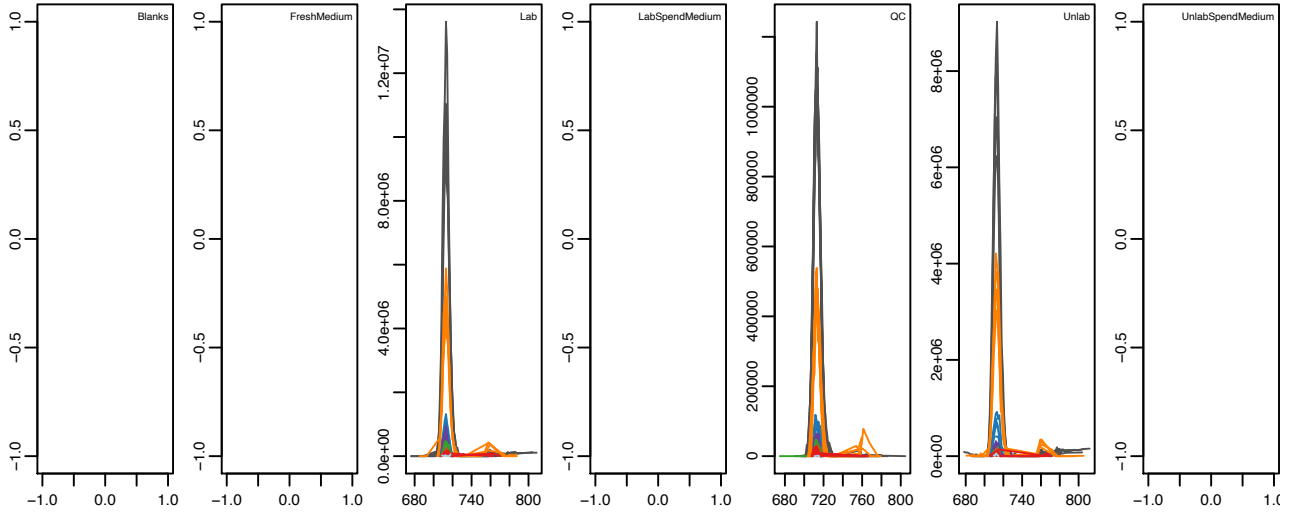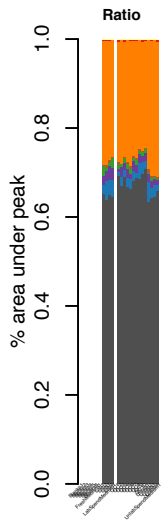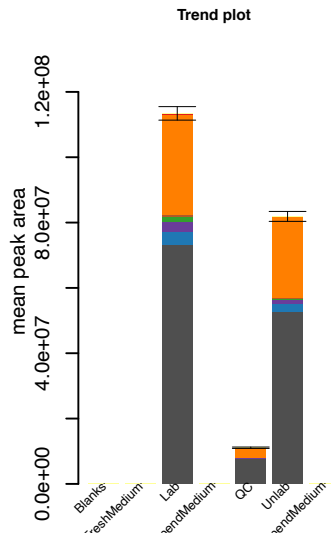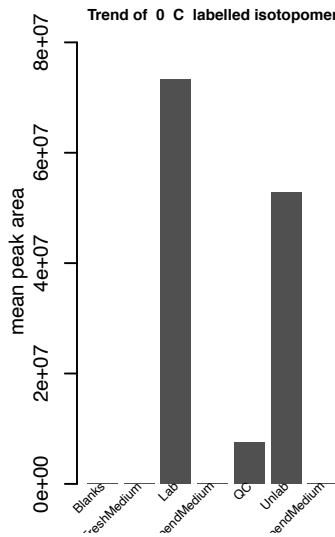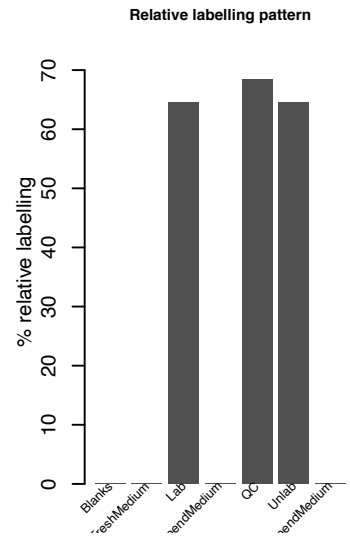



# AMP

Formula: C<sub>10</sub>H<sub>14</sub>N<sub>5</sub>O<sub>7</sub>P Mass: 347.063 Std.RT: 670.8 Ion: NEG

# G1

■UL ■+1 ■+2 ■+3 ■+4 ■+5 ■+6 ■+7 ■+8 ■+9 ■+10

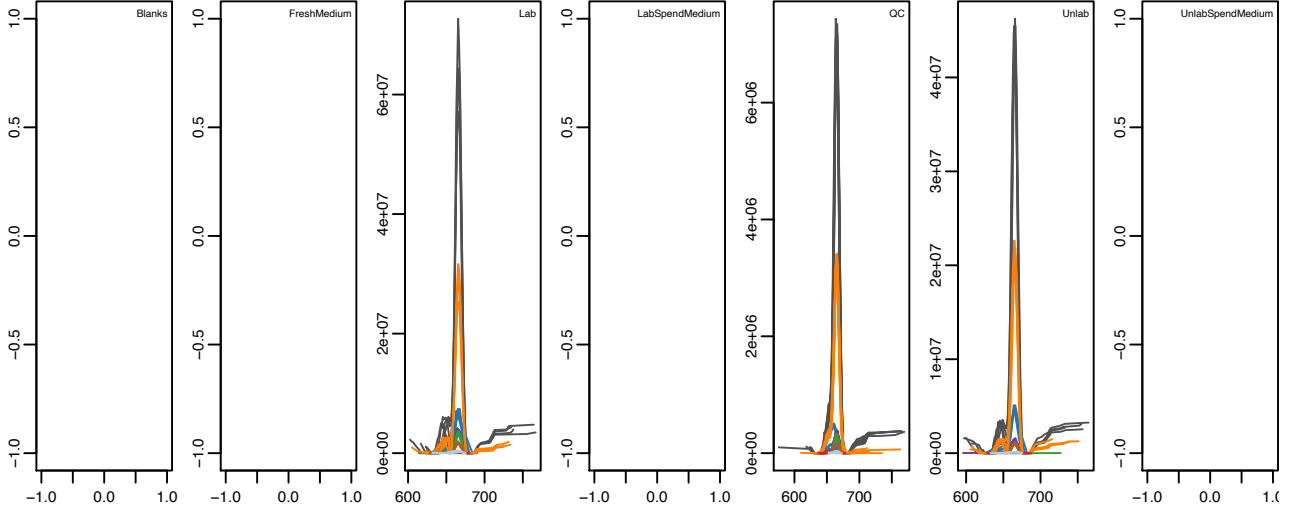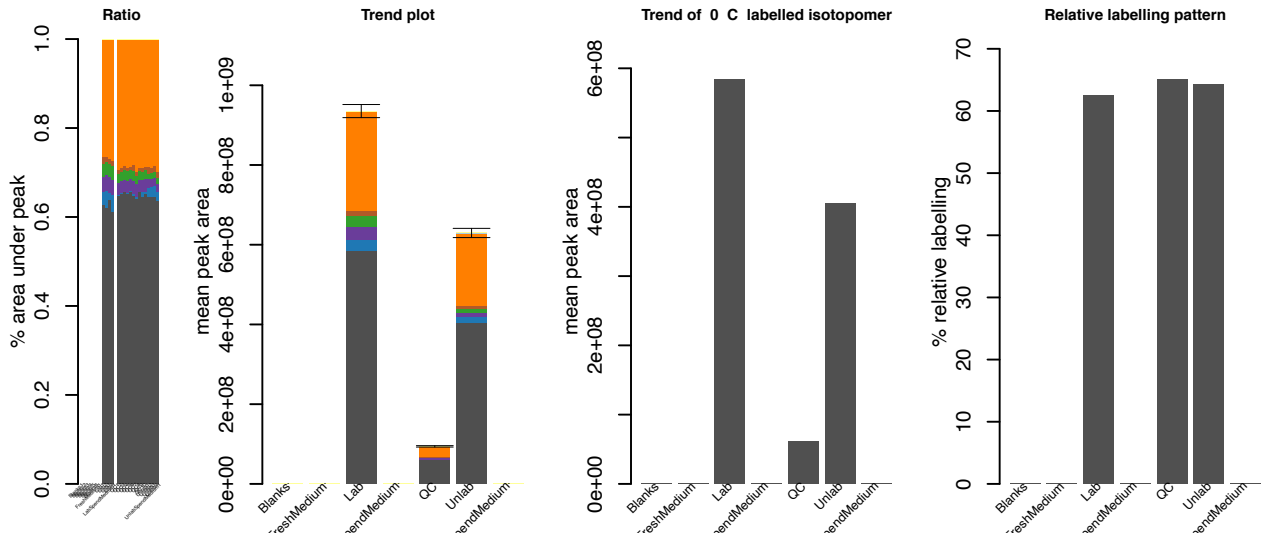

# Adenine

Formula: C<sub>5</sub>H<sub>5</sub>N<sub>5</sub> Mass: 135.054 Std.RT: 523.8 Ion: NEG

# G1

■ UL ■ +1 ■ +2 ■ +3 ■ +4 ■ +5

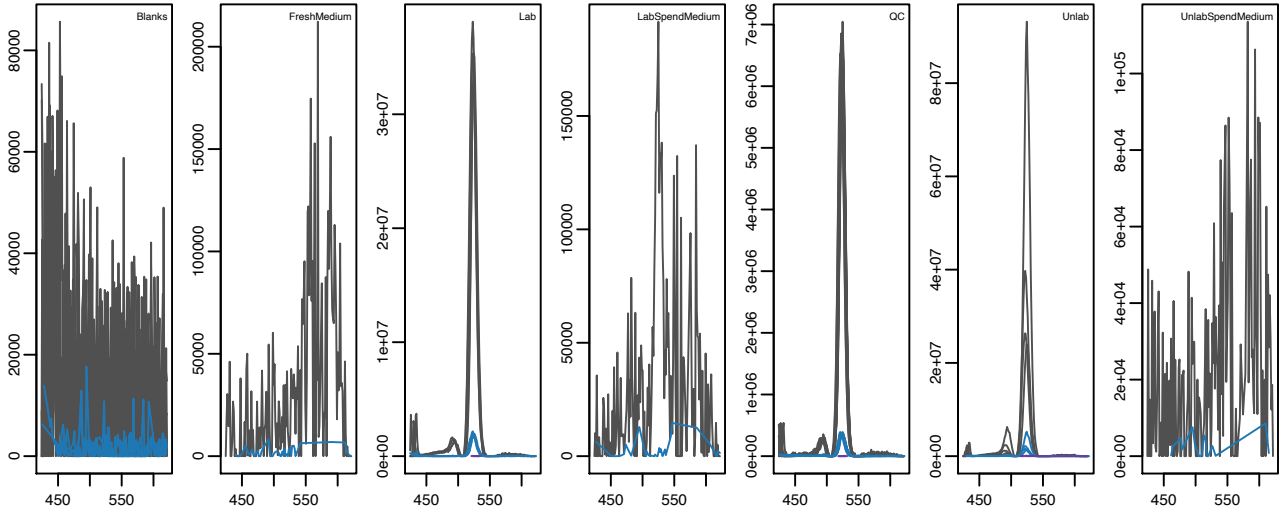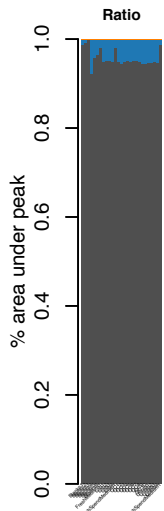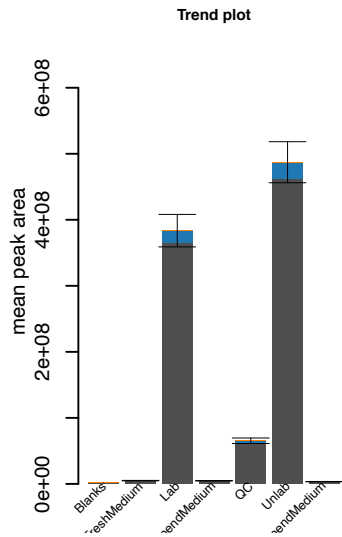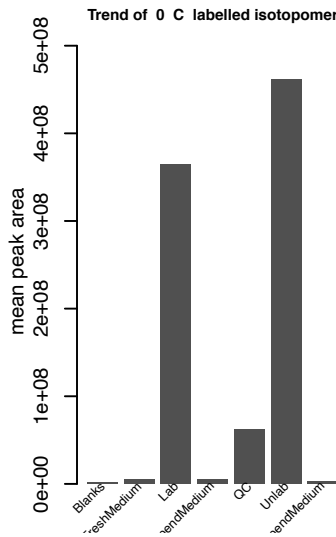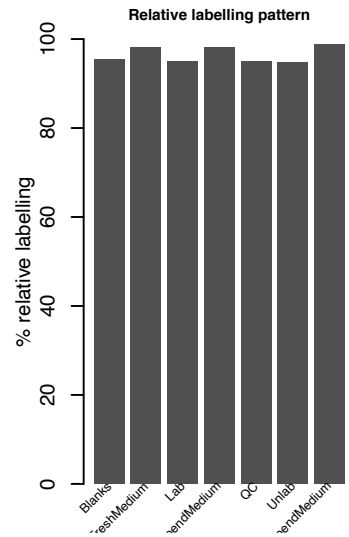

# Adenosine

Formula: C<sub>10</sub>H<sub>13</sub>N<sub>5</sub>O<sub>4</sub> Mass: 267.097 Std.RT: 494.4 Ion: NEG

# G1

■UL ■+1 ■+2 ■+3 ■+4 ■+5 ■+6 ■+7 ■+8 ■+9 ■+10

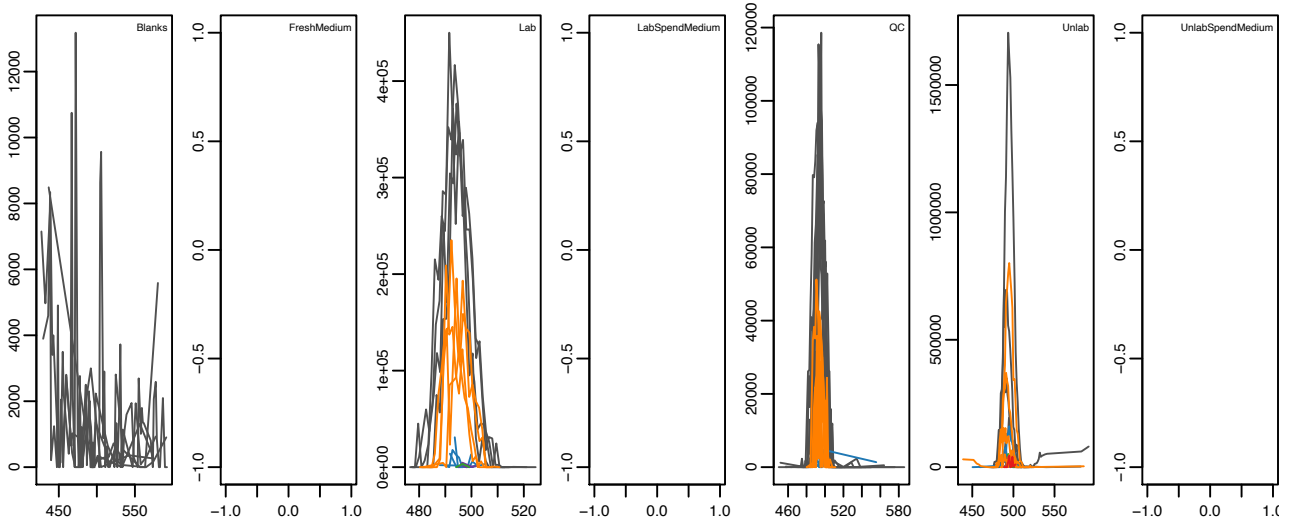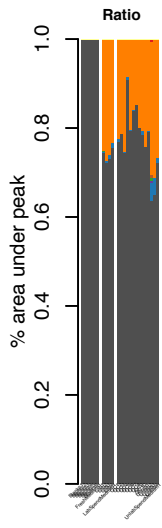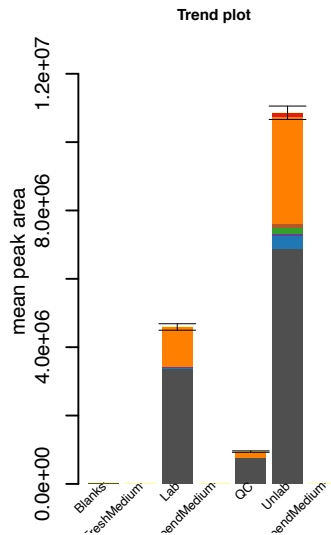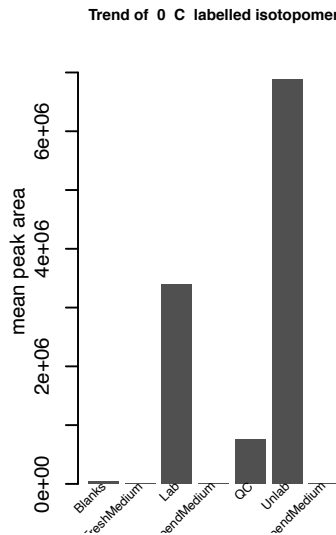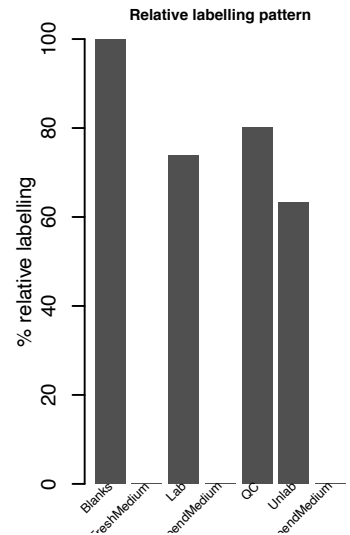

# Adenosine 2'\_5'-bisphosphate

Formula: C<sub>10</sub>H<sub>15</sub>N<sub>5</sub>O<sub>10</sub>P<sub>2</sub> Mass: 427.029 Std.RT: 761.4 Ion: NEG

# G1

■UL ■+1 ■+2 ■+3 ■+4 ■+5 ■+6 ■+7 ■+8 ■+9 ■+10

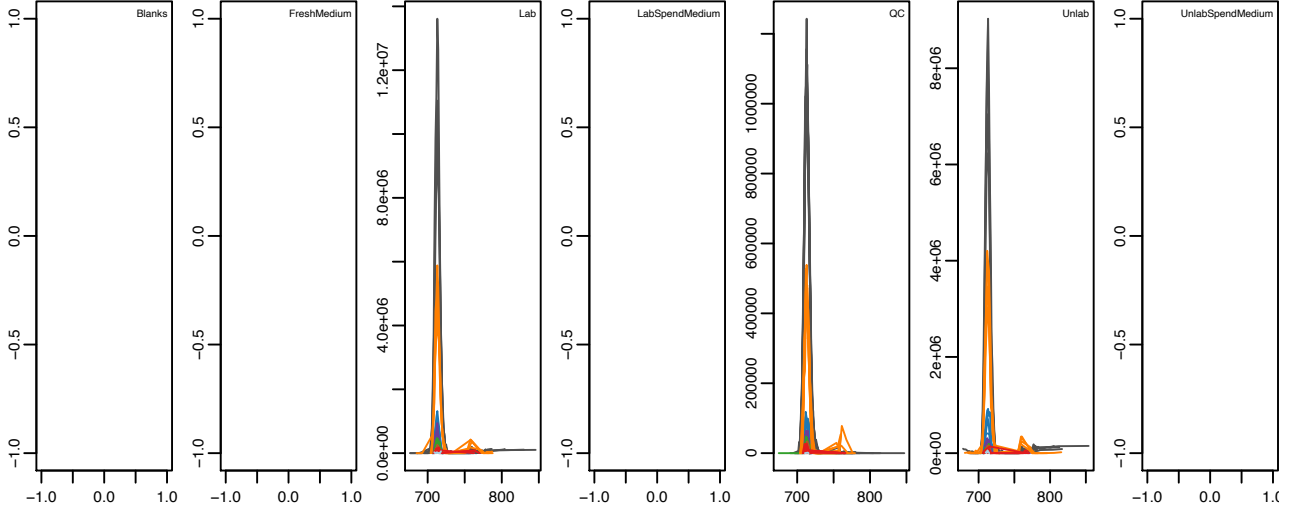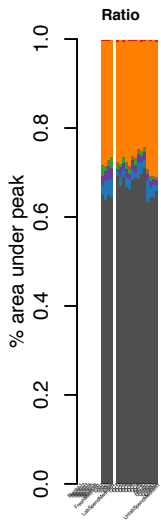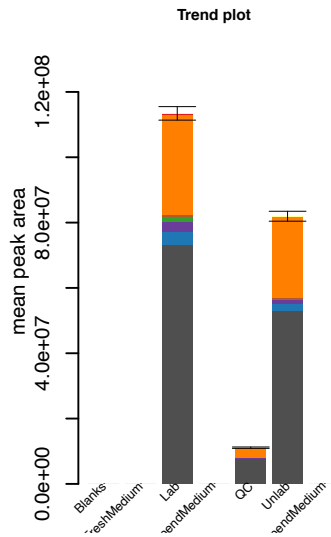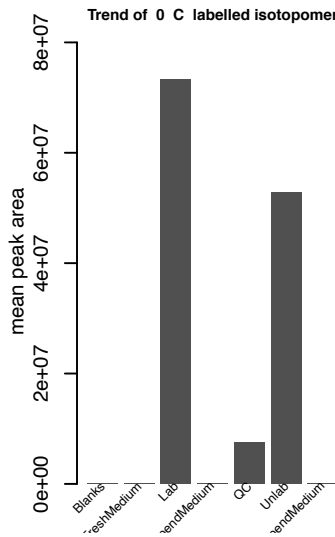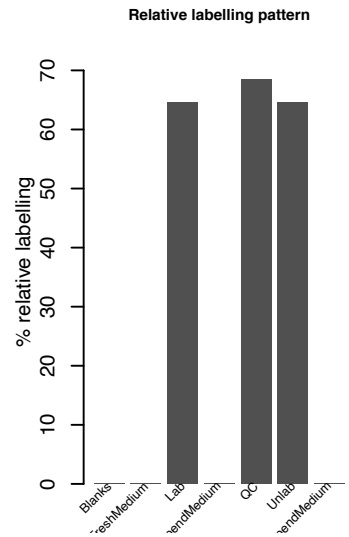

# D-Fructose 6-phosphate

Formula: C<sub>6</sub>H<sub>13</sub>O<sub>9</sub>P Mass: 260.03 Std.RT: 754.8 Ion: NEG

# G1

■ UL ■ +1 ■ +2 ■ +3 ■ +4 ■ +5 ■ +6

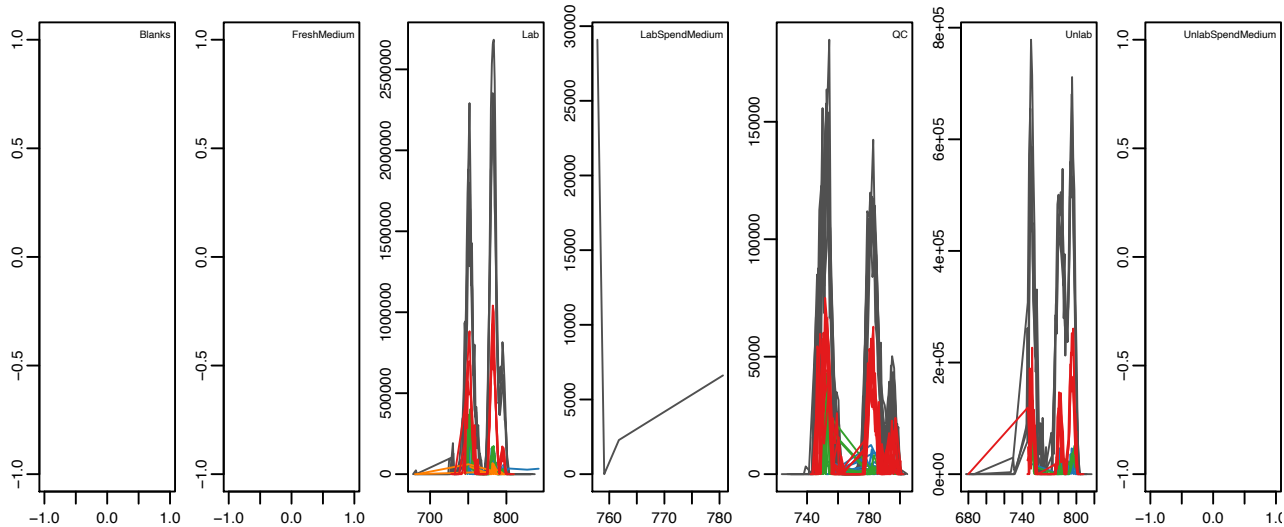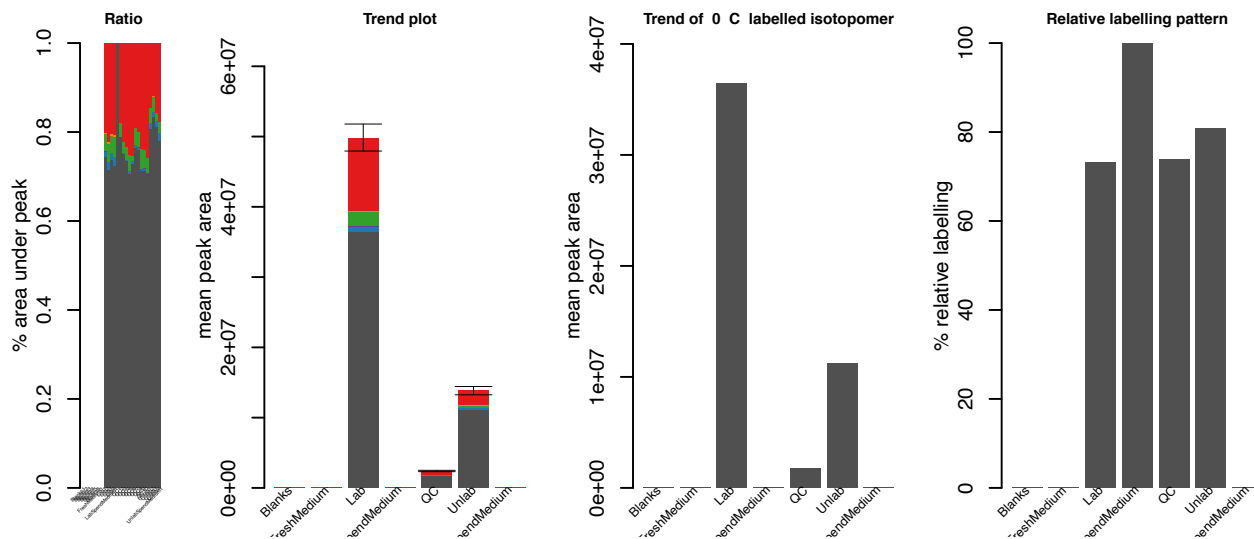

# D-Gluconic acid

Formula: C<sub>6</sub>H<sub>12</sub>O<sub>7</sub> Mass: 196.058 Std.RT: 712.8 Ion: NEG

# G1

■ UL ■ +1 ■ +2 ■ +3 ■ +4 ■ +5 ■ +6

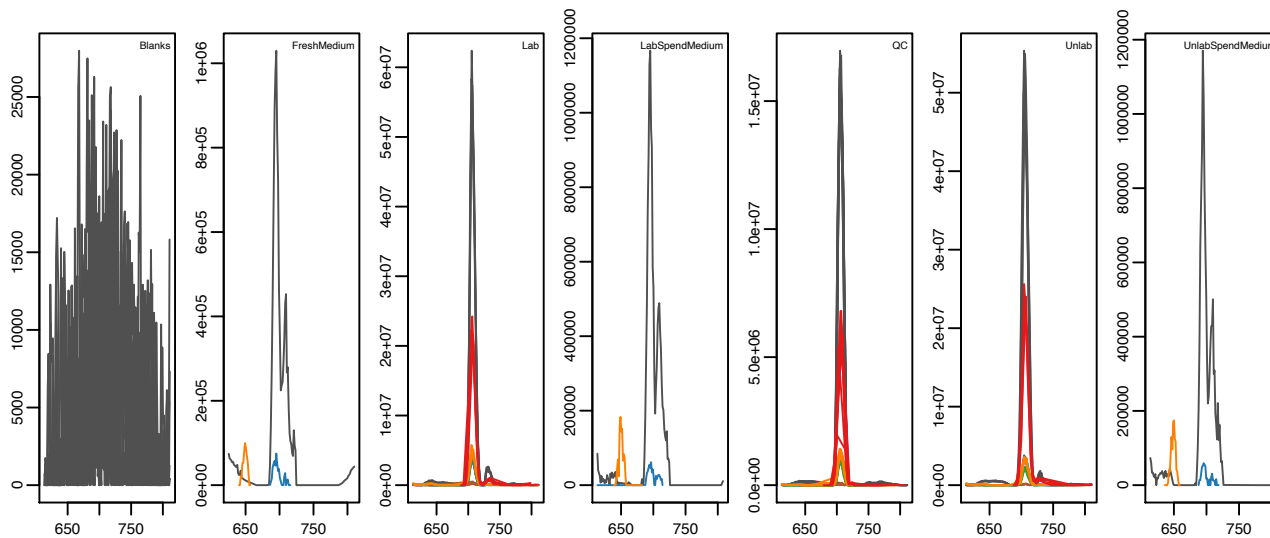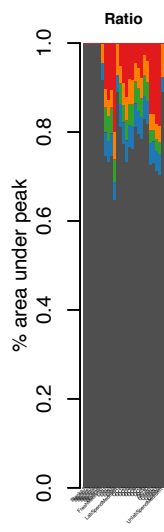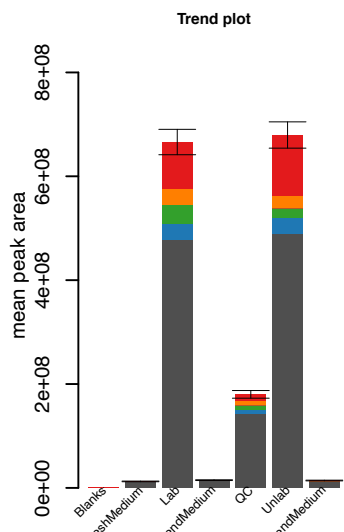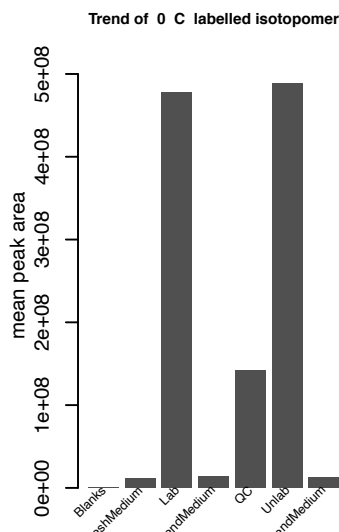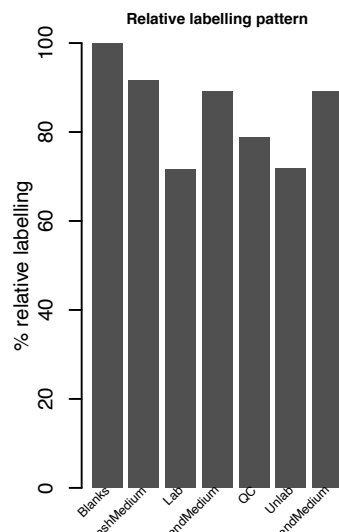

# D-Glucosamine-6-phosphate

Formula: C<sub>6</sub>H<sub>14</sub>NO<sub>8</sub>P Mass: 259.046 Std.RT: 759 Ion: NEG

# G1

■UL ■+1 ■+2 ■+3 ■+4 ■+5 ■+6

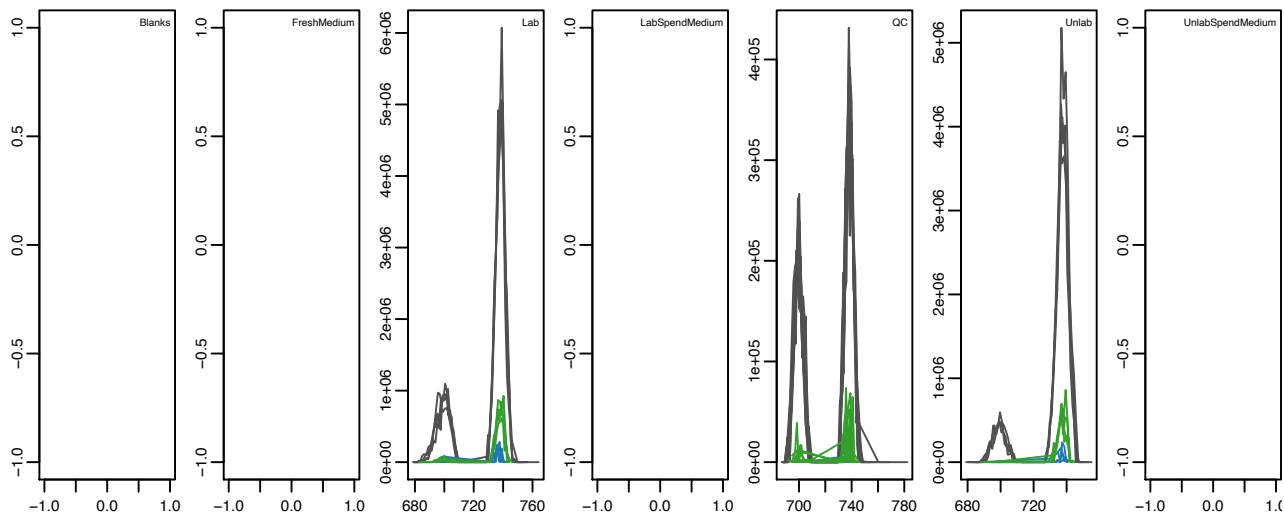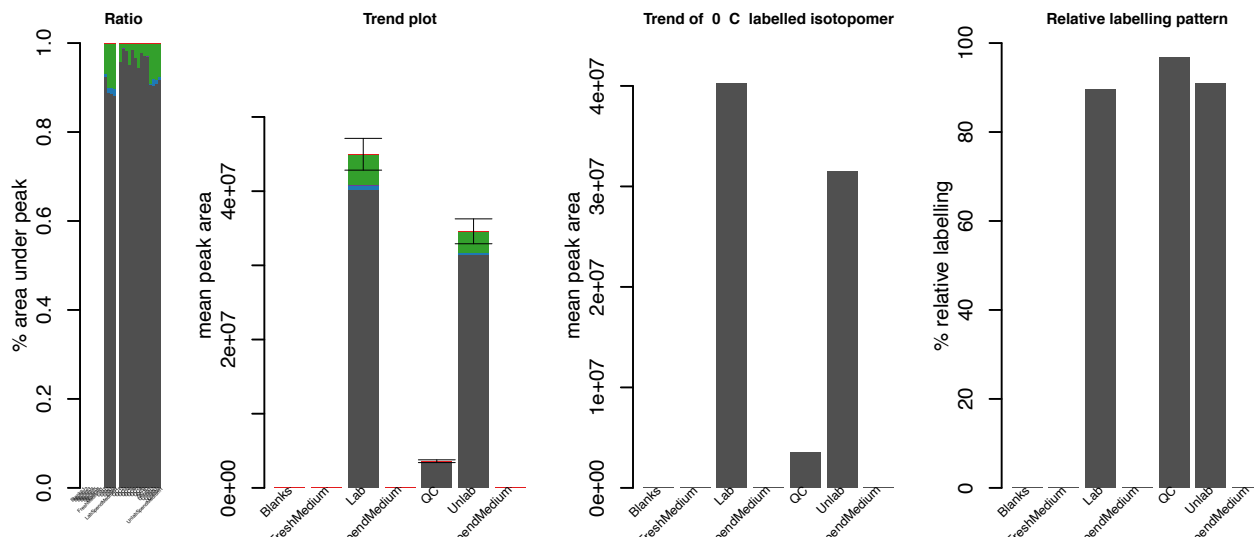

# D-glucose 6-phosphate

Formula: C<sub>6</sub>H<sub>13</sub>O<sub>9</sub>P Mass: 260.03 Std.RT: 783 Ion: NEG

# G1

■ UL ■ +1 ■ +2 ■ +3 ■ +4 ■ +5 ■ +6

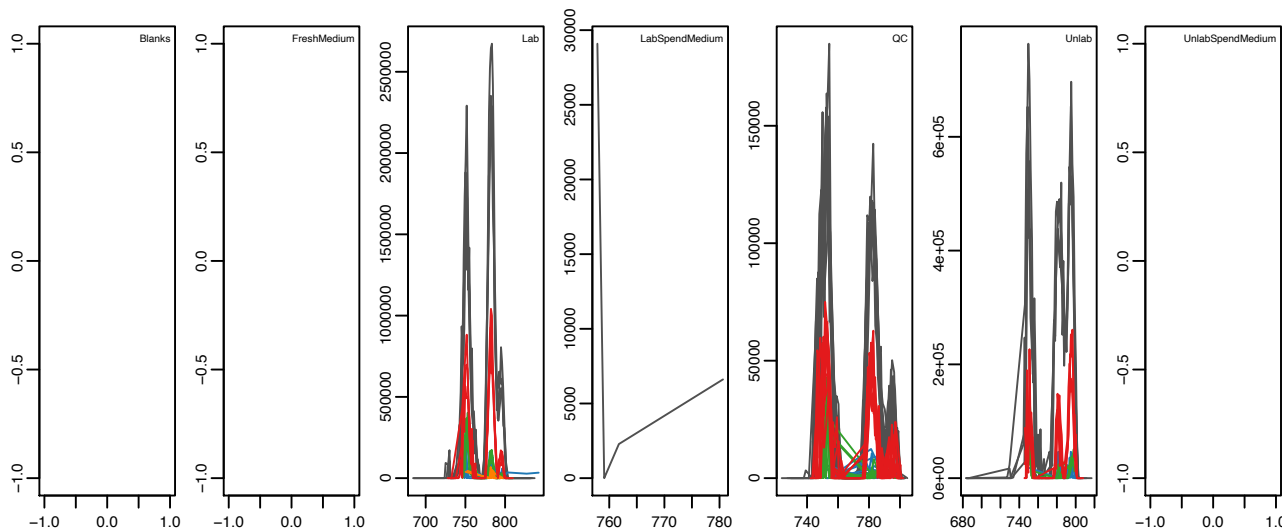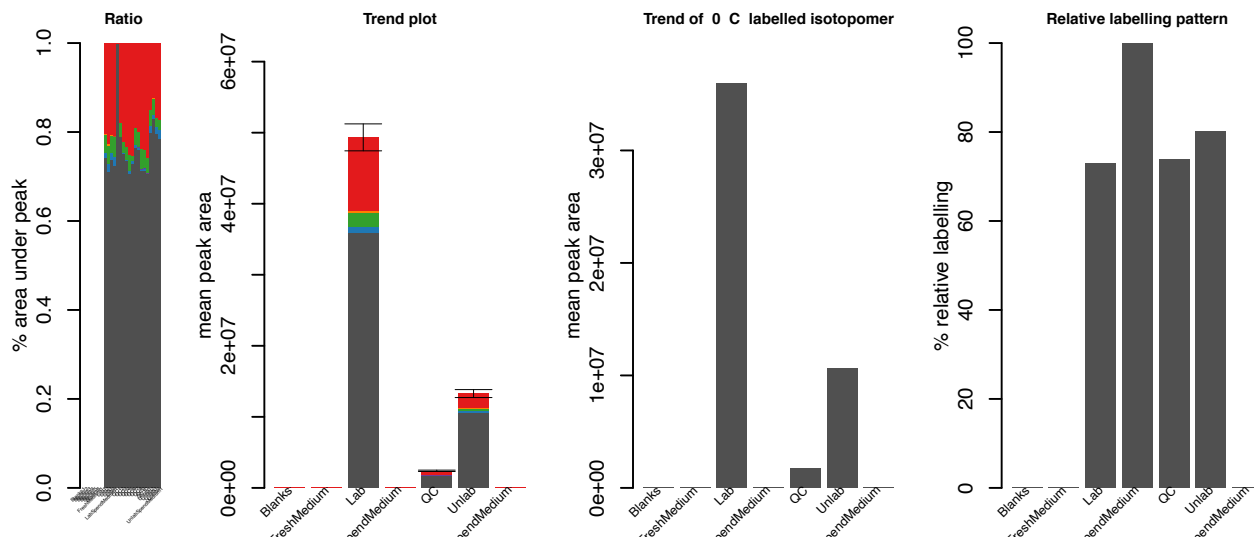



# D-ribose 5-phosphate

Formula: C<sub>5</sub>H<sub>11</sub>O<sub>8</sub>P Mass: 230.019 Std.RT: 750 Ion: NEG

# G1

■UL ■+1 ■+2 ■+3 ■+4 ■+5

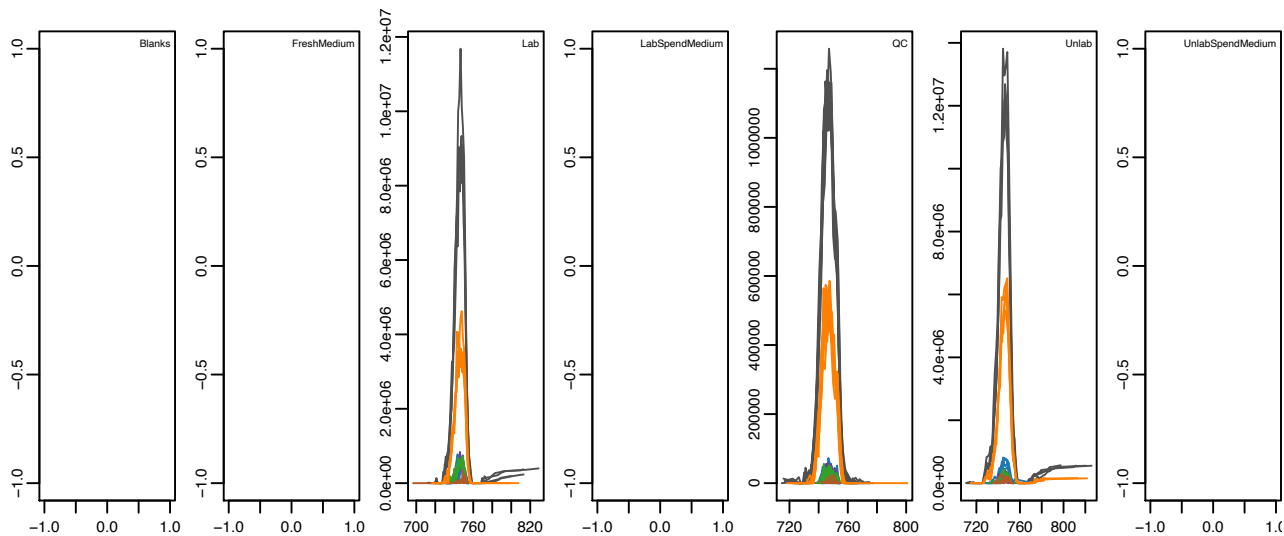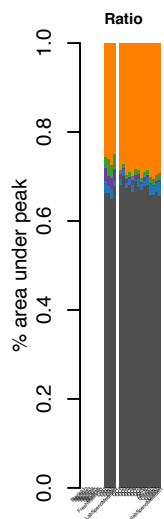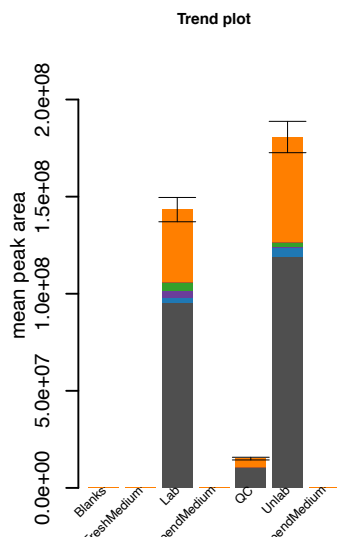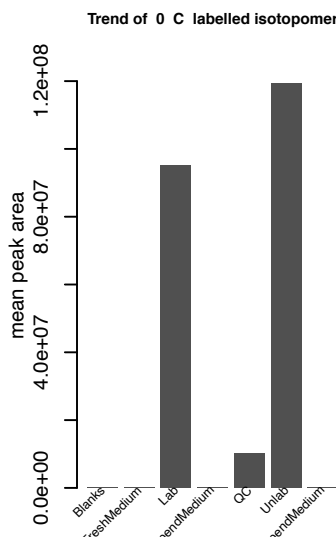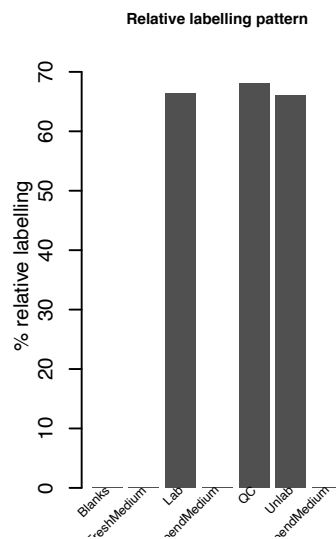

# Fumarate

Formula: C<sub>4</sub>H<sub>4</sub>O<sub>4</sub> Mass: 116.011 Std.RT: 784.2 Ion: NEG

# G1

■ UL ■ +1 ■ +2 ■ +3 ■ +4

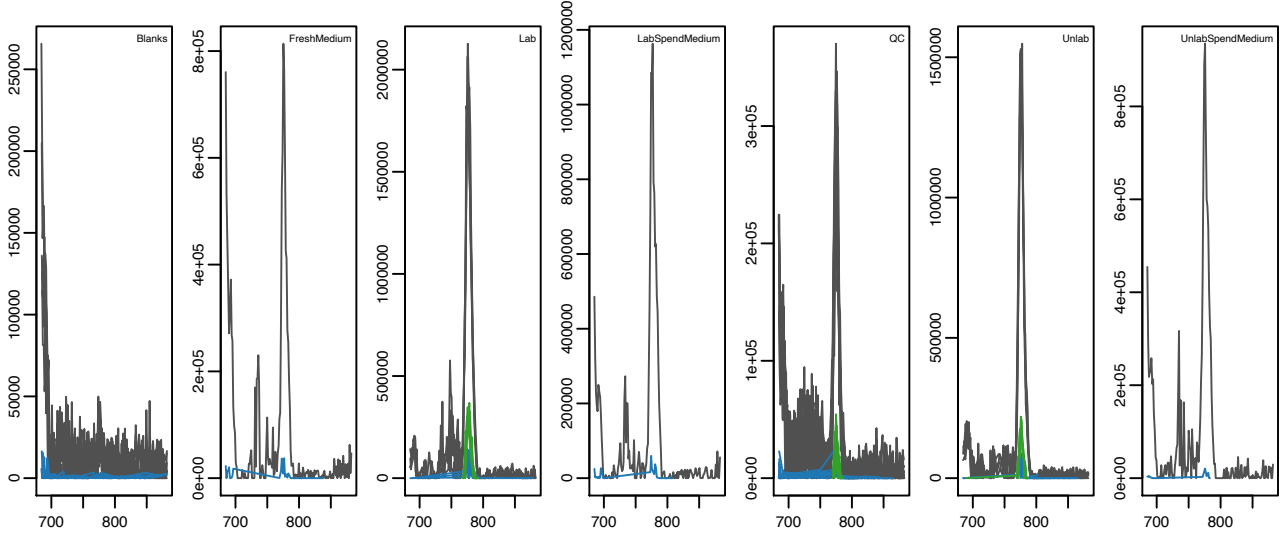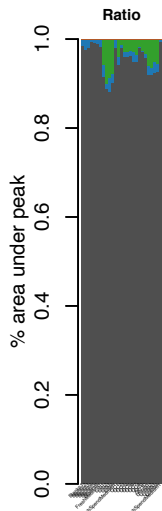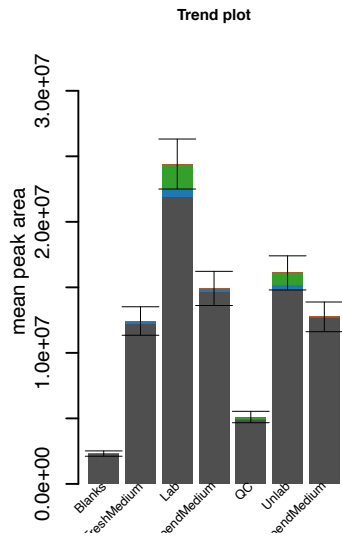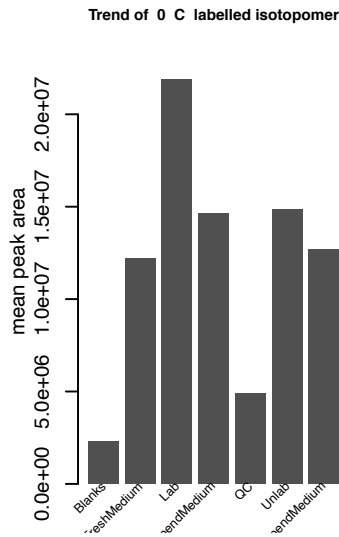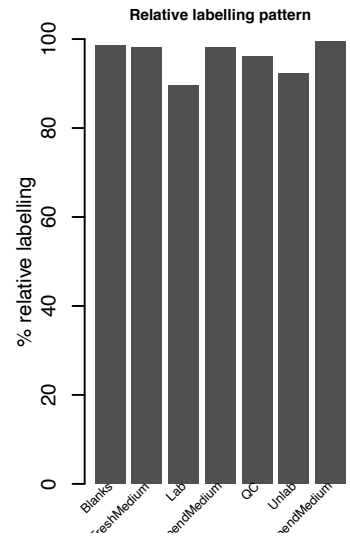

# GDP

Formula: C<sub>10</sub>H<sub>15</sub>N<sub>5</sub>O<sub>11</sub>P<sub>2</sub> Mass: 443.024 Std.RT: 816 Ion: NEG

# G1

■UL ■+1 ■+2 ■+3 ■+4 ■+5 ■+6 ■+7 ■+8 ■+9 ■+10

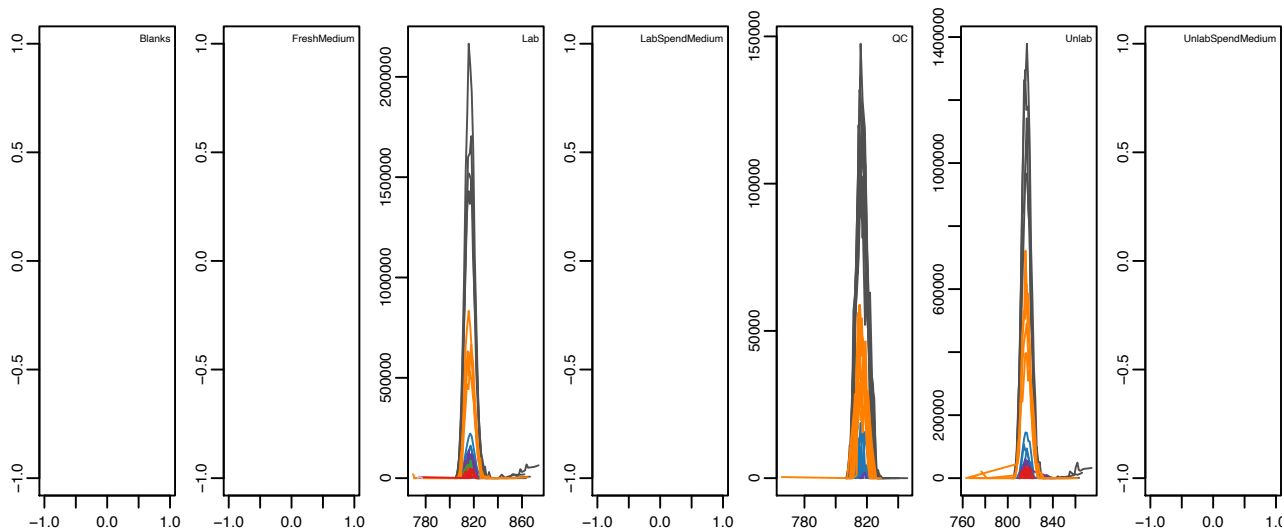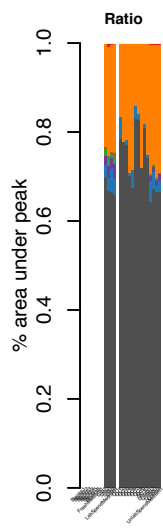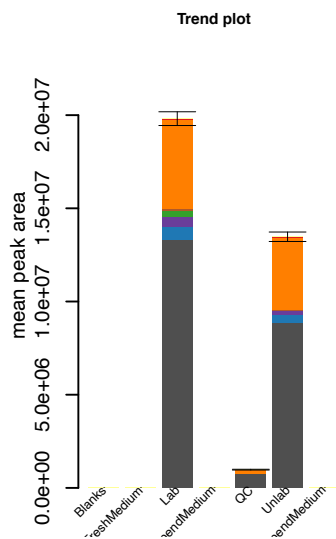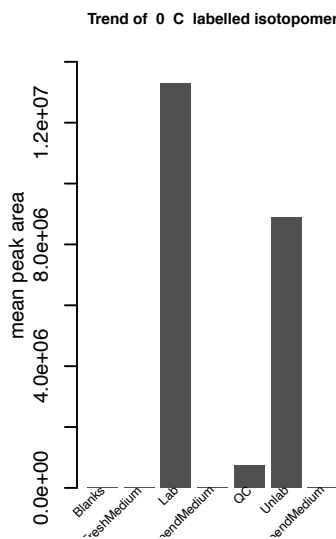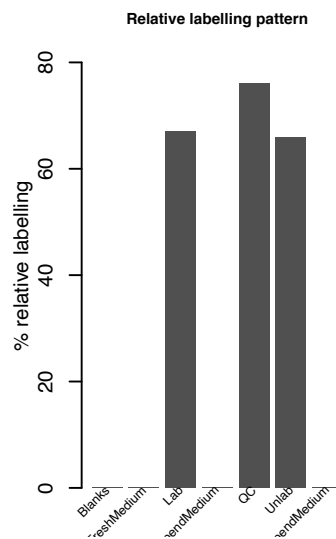

# GMP

Formula: C<sub>10</sub>H<sub>14</sub>N<sub>5</sub>O<sub>8</sub>P Mass: 363.058 Std.RT: 747 Ion: NEG

# G1

■ UL ■ +1 ■ +2 ■ +3 ■ +4 ■ +5 ■ +6 ■ +7 ■ +8 ■ +9 ■ +10

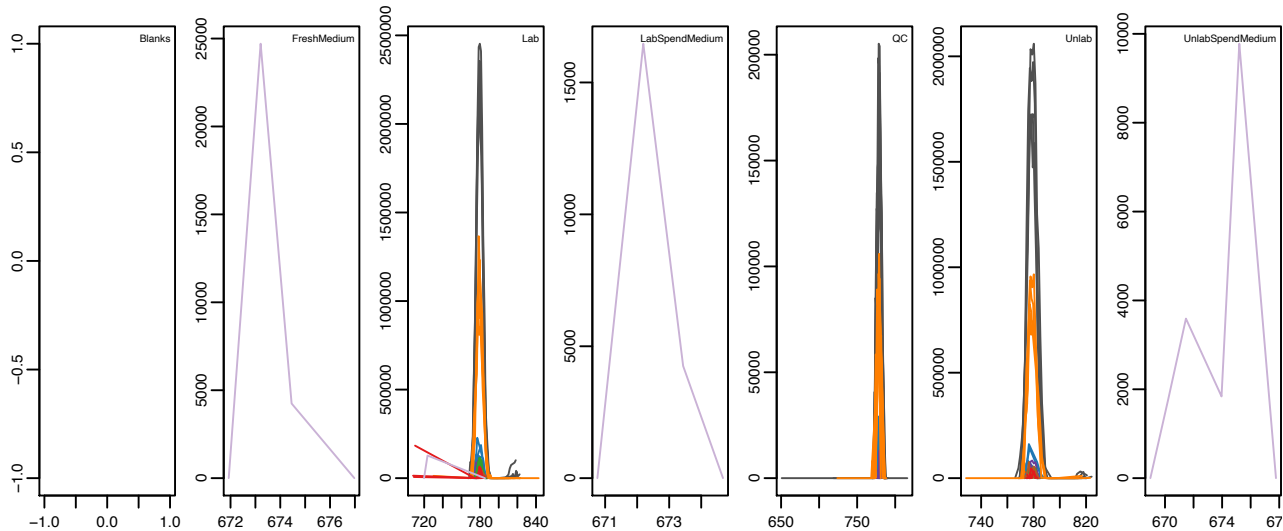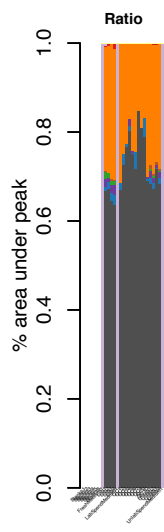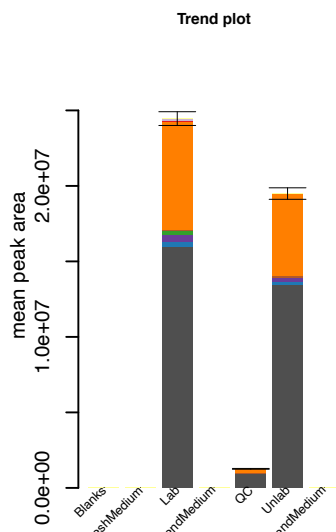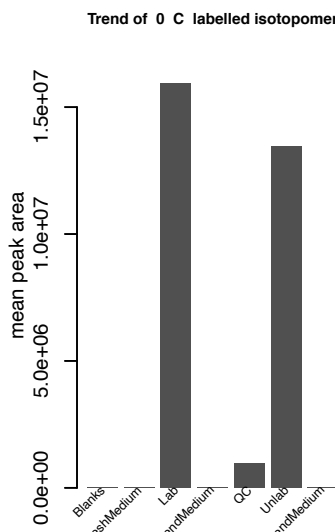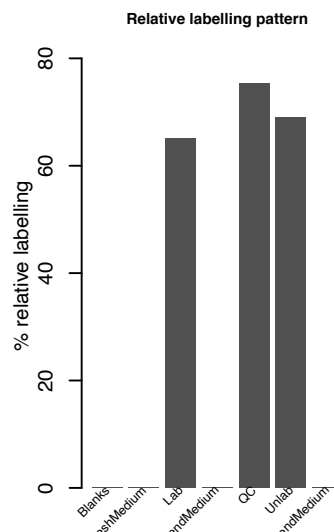

# Glycerol

Formula: C<sub>3</sub>H<sub>8</sub>O<sub>3</sub> Mass: 92.047 Std.RT: 525 Ion: NEG

# G1

■ UL ■ +1 ■ +2 ■ +3

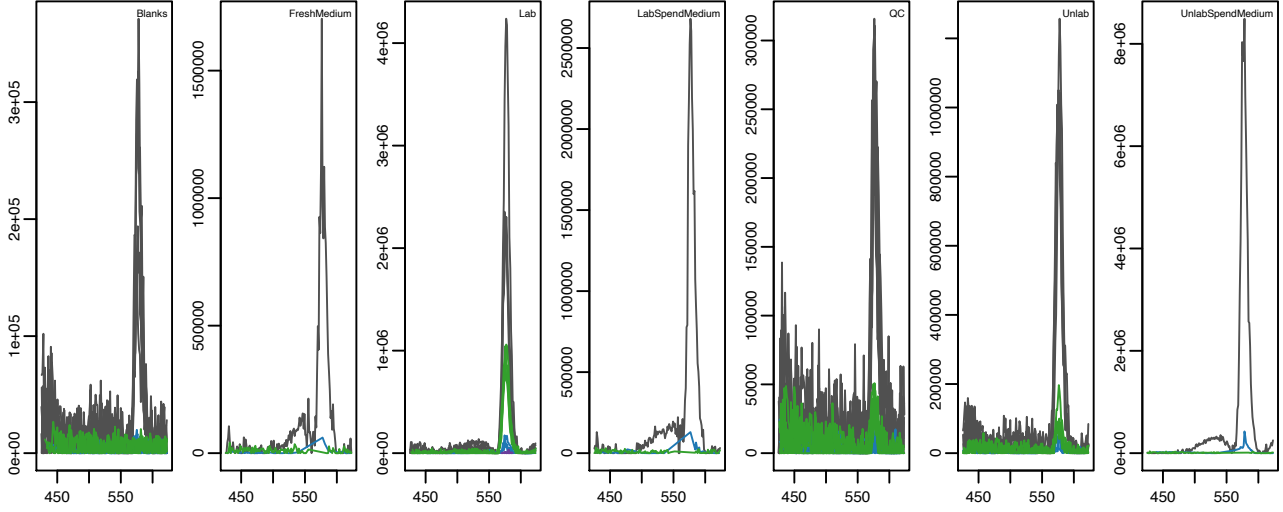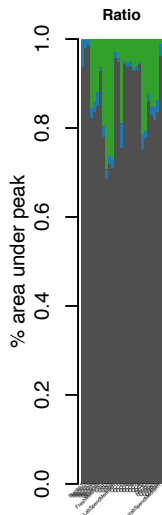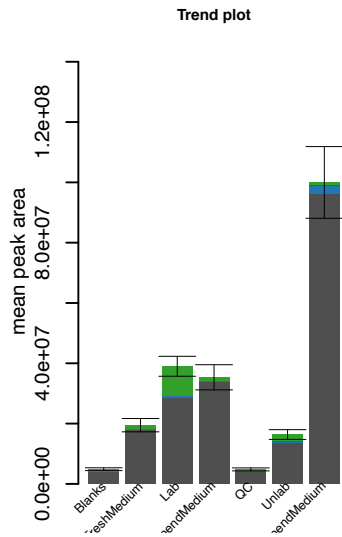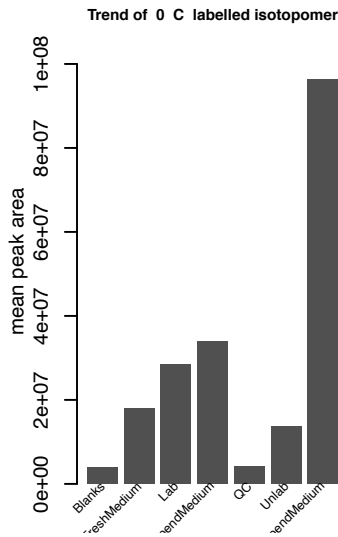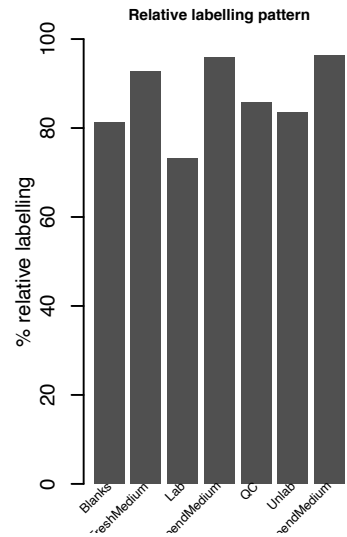

# Guanine

Formula: C<sub>5</sub>H<sub>5</sub>N<sub>5</sub>O Mass: 151.049 Std.RT: 664.2 Ion: NEG

# G1

■ UL ■ +1 ■ +2 ■ +3 ■ +4 ■ +5

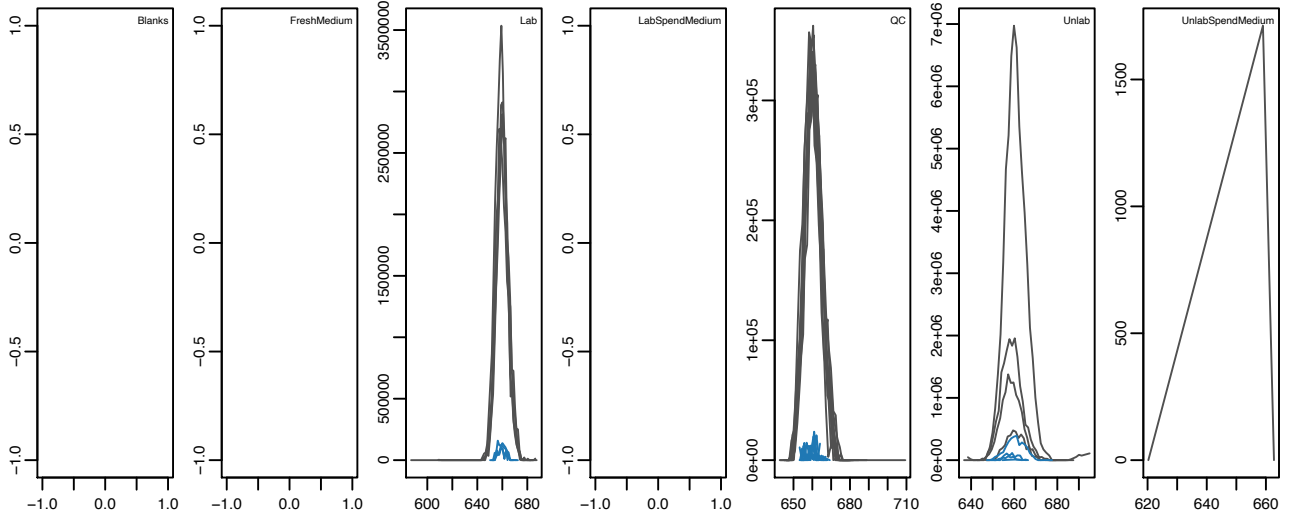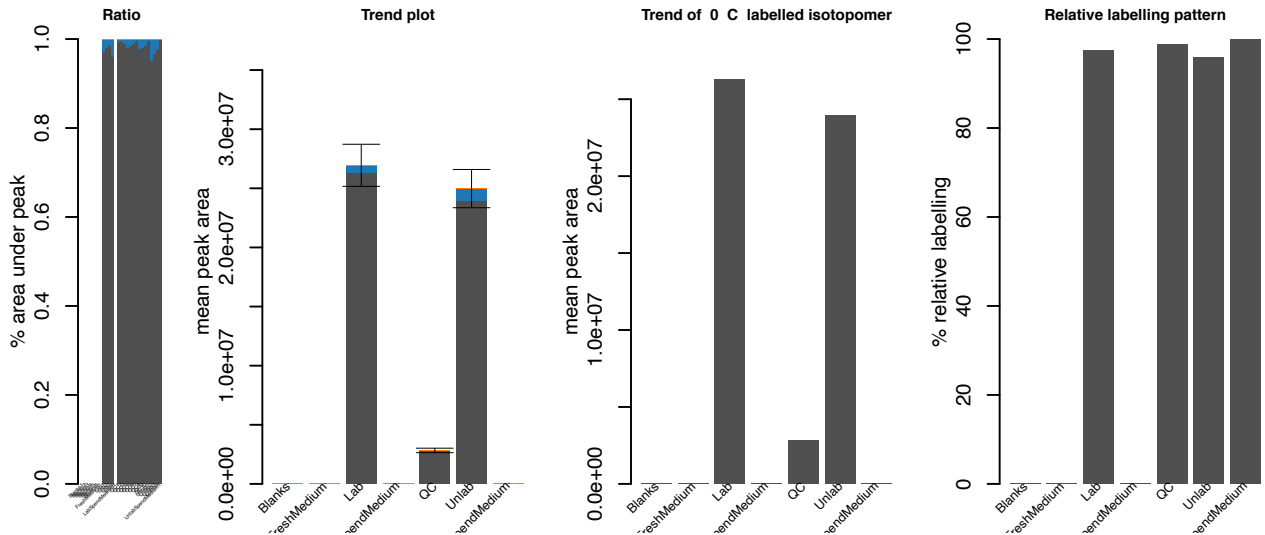

# Hypoxanthine

Formula: C<sub>5</sub>H<sub>4</sub>N<sub>4</sub>O Mass: 136.039 Std.RT: 562.2 Ion: NEG

# G1

■ UL ■ +1 ■ +2 ■ +3 ■ +4 ■ +5

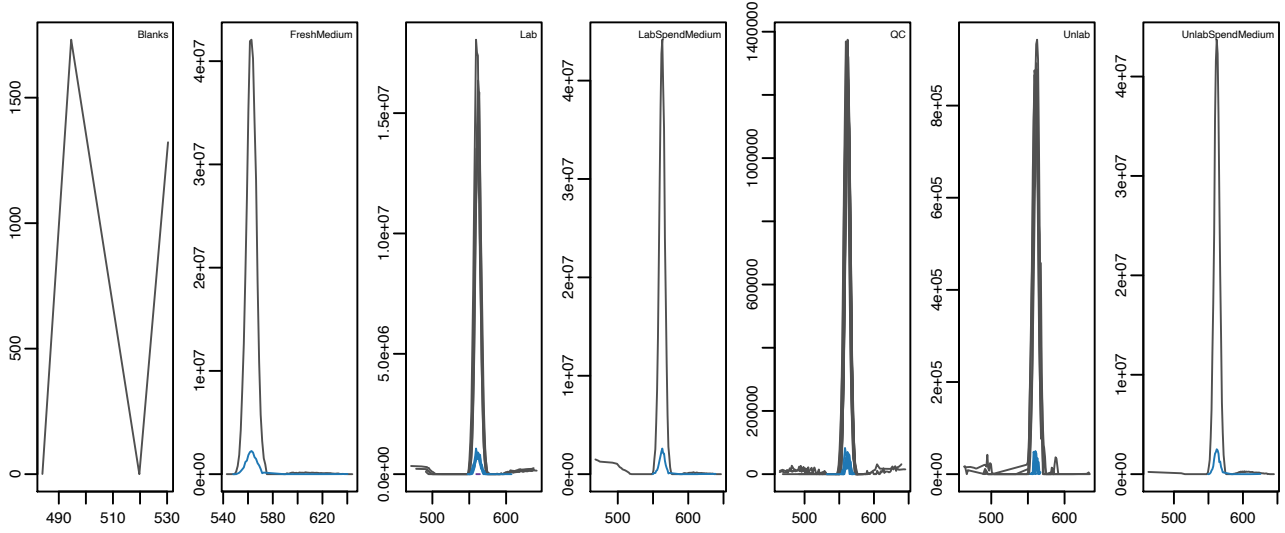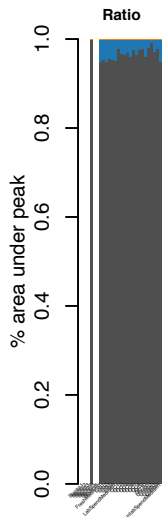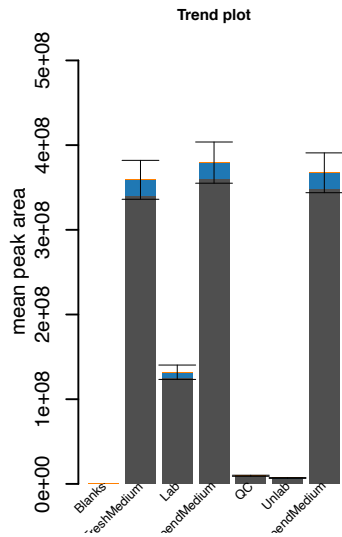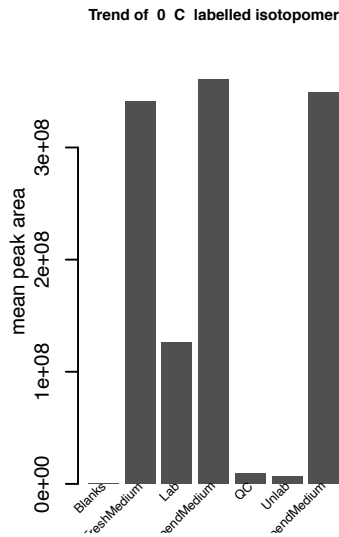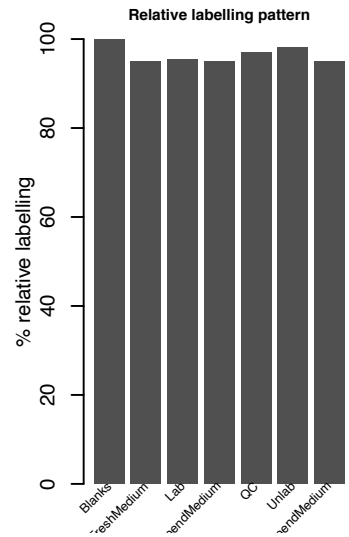

# IMP

Formula: C<sub>10</sub>H<sub>13</sub>N<sub>4</sub>O<sub>8</sub>P Mass: 348.047 Std.RT: 732.6 Ion: NEG

# G1

■ UL ■ +1 ■ +2 ■ +3 ■ +4 ■ +5 ■ +6 ■ +7 ■ +8 ■ +9 ■ +10

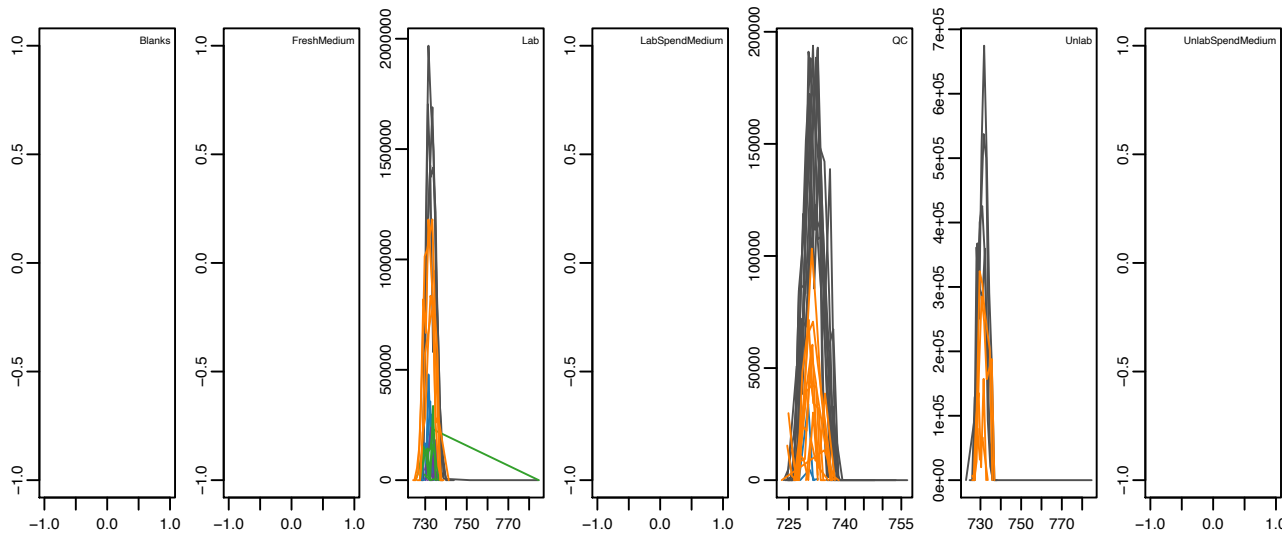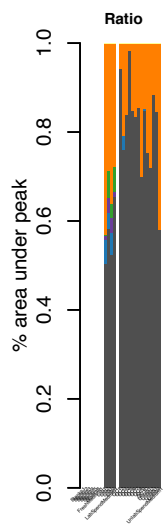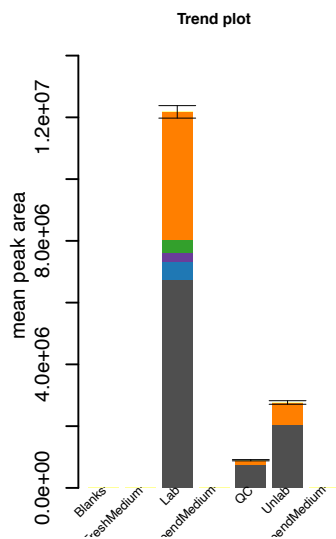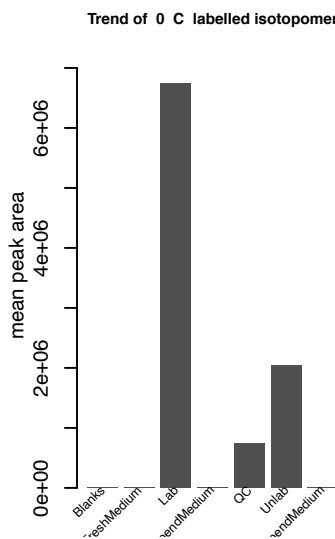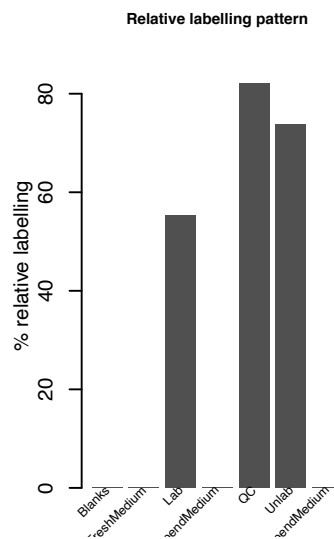



# L-Alanine

Formula: C<sub>3</sub>H<sub>7</sub>NO<sub>2</sub> Mass: 89.048 Std.RT: 737.4 Ion: NEG

# G1

■ UL ■ +1 ■ +2 ■ +3

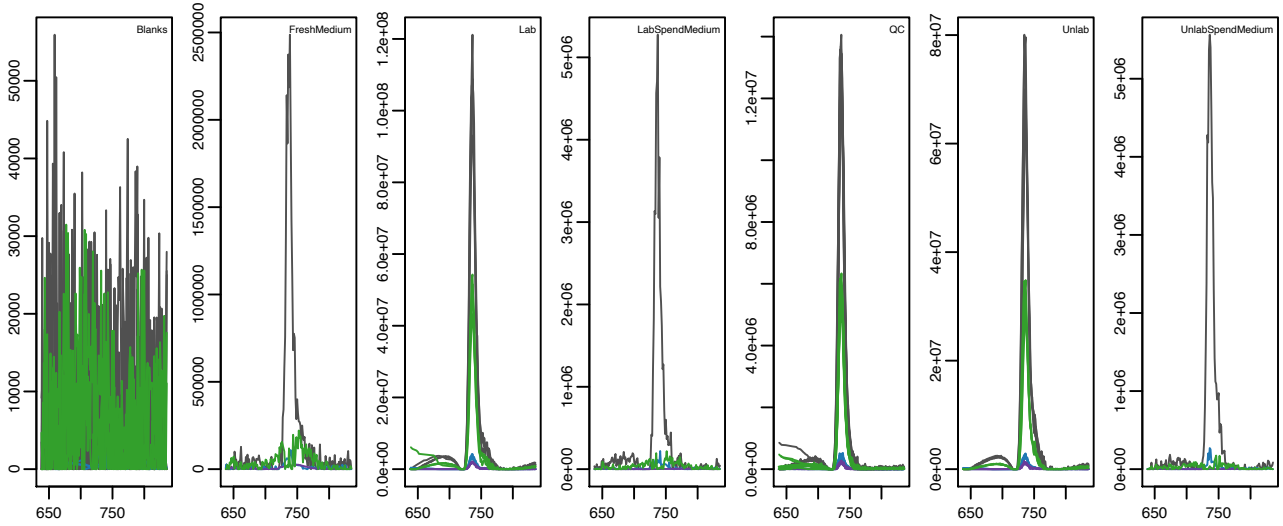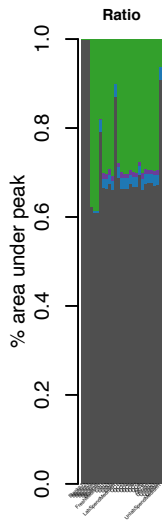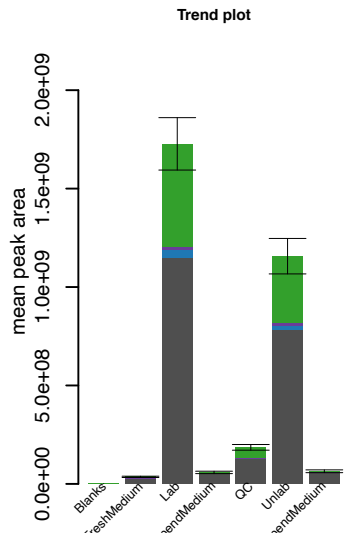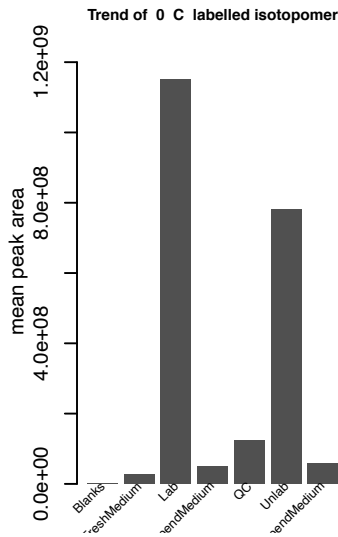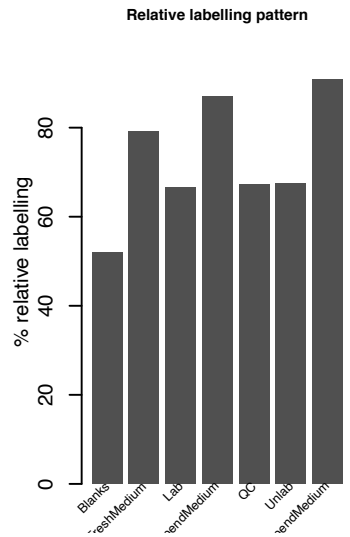

# L-Arginine

Formula: C<sub>6</sub>H<sub>14</sub>N<sub>4</sub>O<sub>2</sub> Mass: 174.112 Std.RT: 1209.6 Ion: NEG

# G1

■ UL ■ +1 ■ +2 ■ +3 ■ +4 ■ +5 ■ +6

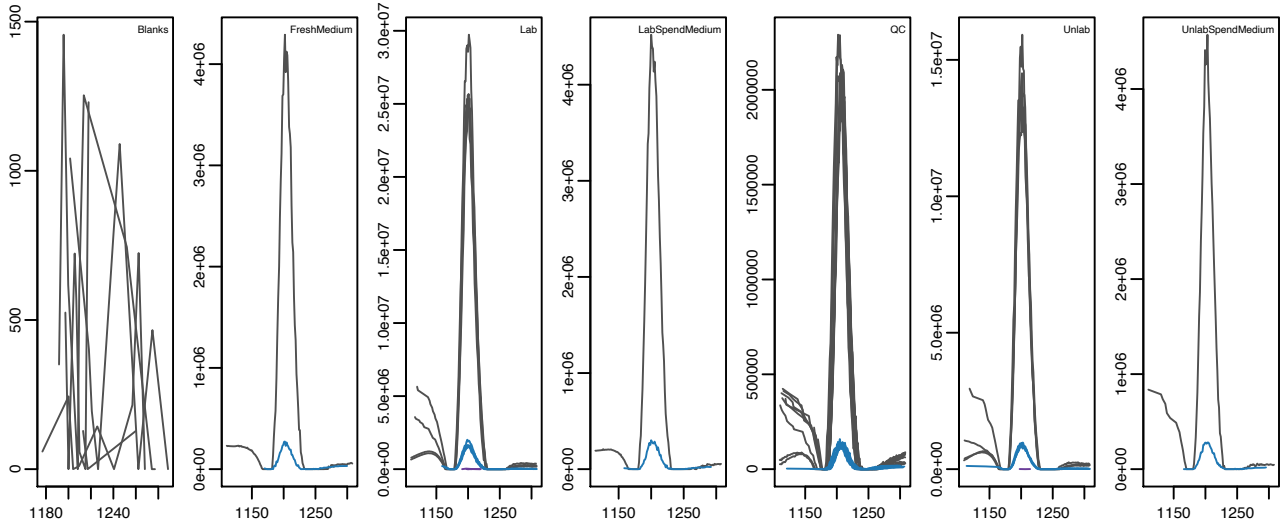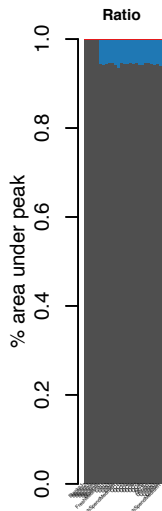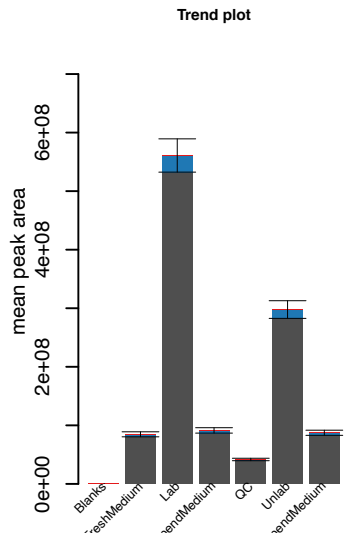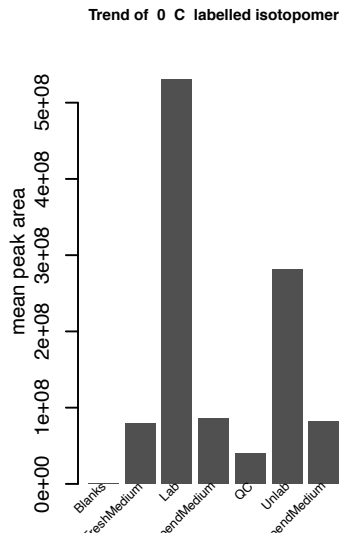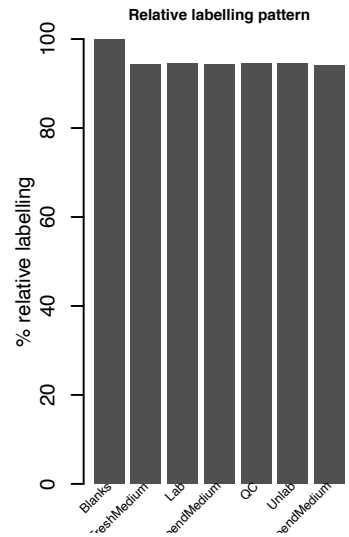

# L-Asparagine

Formula: C<sub>4</sub>H<sub>8</sub>N<sub>2</sub>O<sub>3</sub> Mass: 132.053 Std.RT: 754.8 Ion: NEG

# G1

■ UL ■ +1 ■ +2 ■ +3 ■ +4

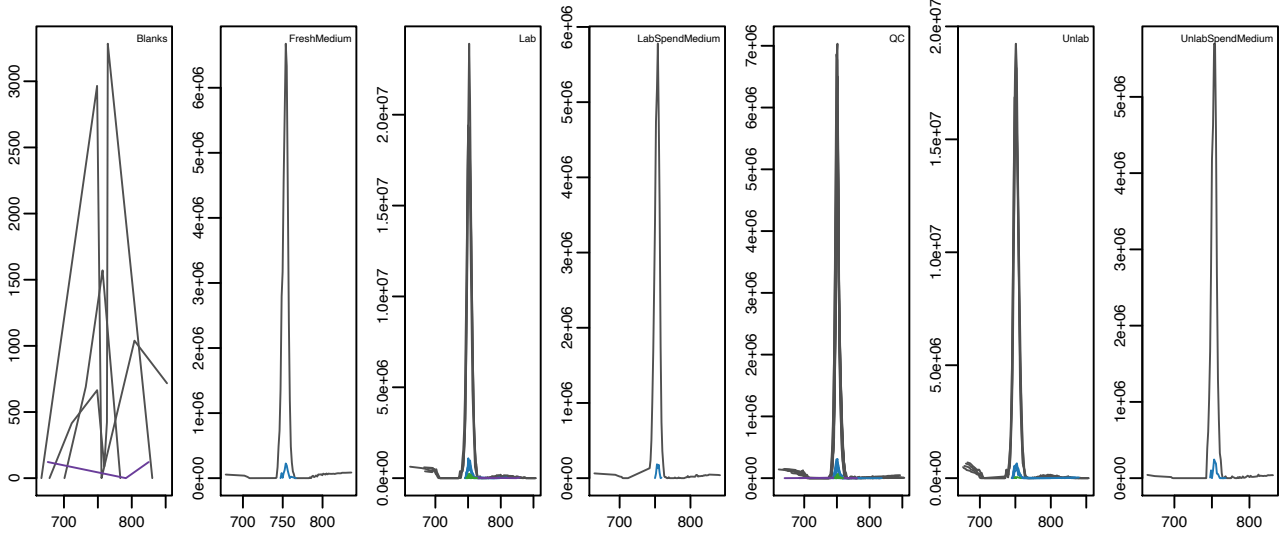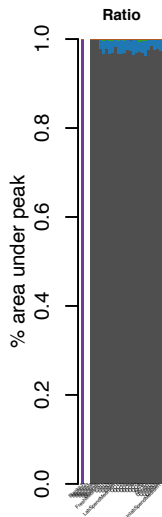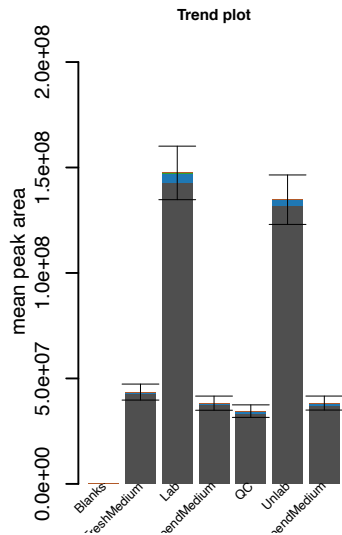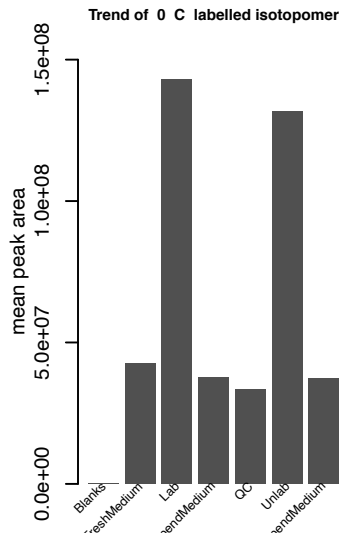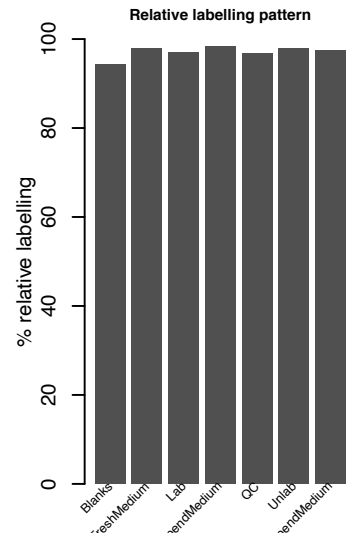

# L-Aspartate

Formula: C<sub>4</sub>H<sub>7</sub>NO<sub>4</sub> Mass: 133.038 Std.RT: 735.6 Ion: NEG

# G1

■ UL ■ +1 ■ +2 ■ +3 ■ +4

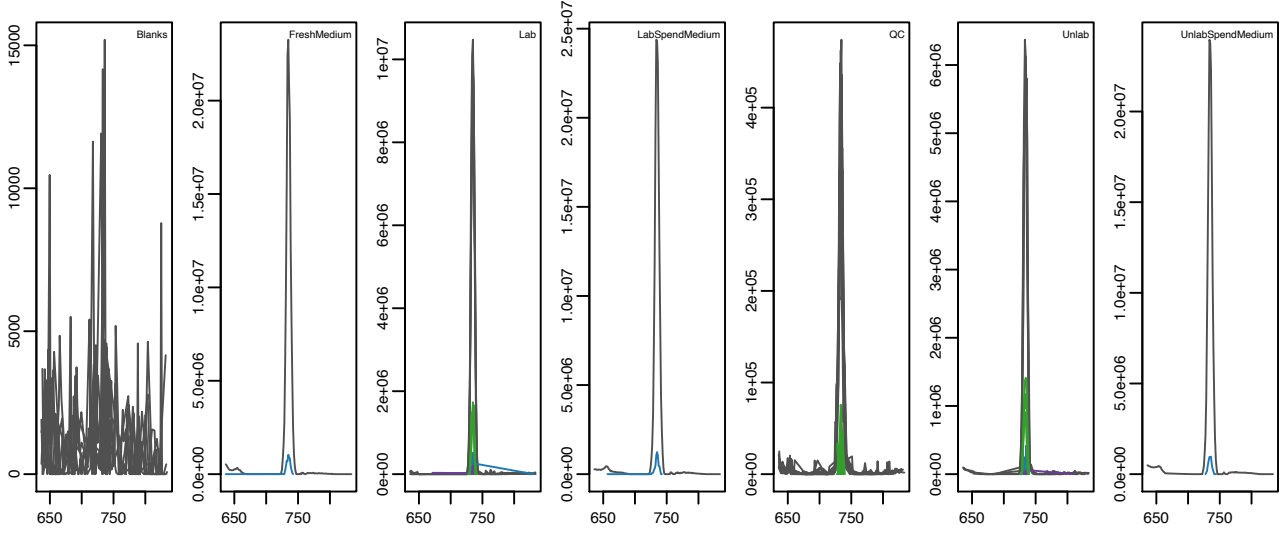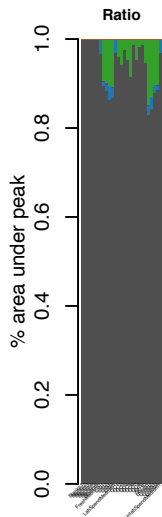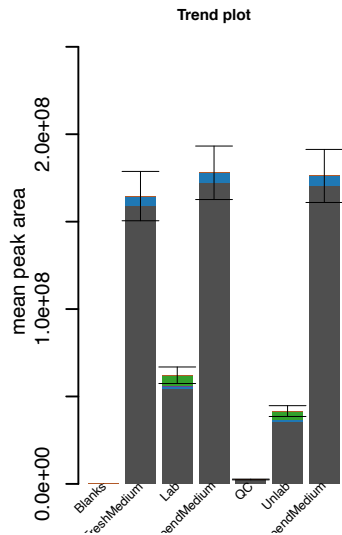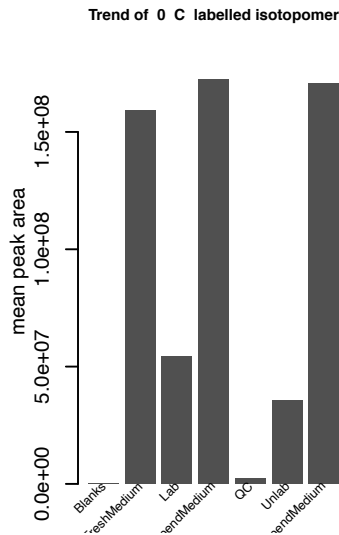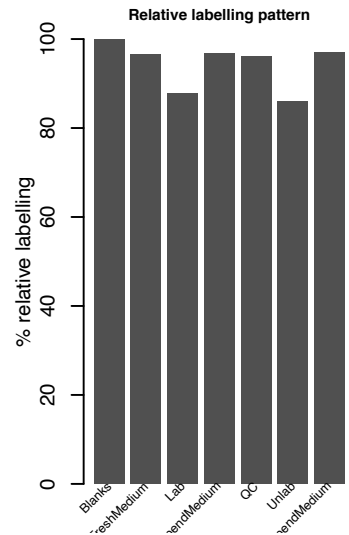

# L-Glutamate

Formula: C<sub>5</sub>H<sub>9</sub>NO<sub>4</sub> Mass: 147.053 Std.RT: 723.6 Ion: NEG

# G1

■ UL ■ +1 ■ +2 ■ +3 ■ +4 ■ +5

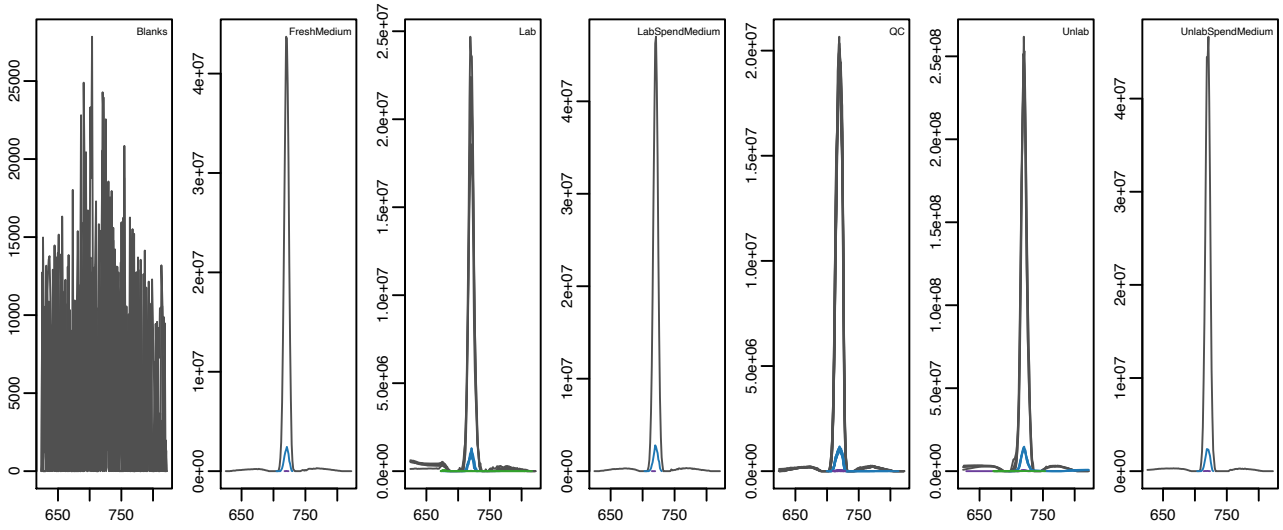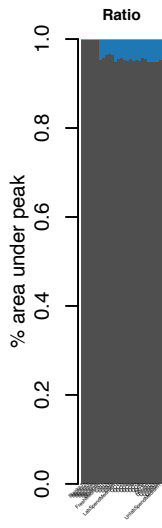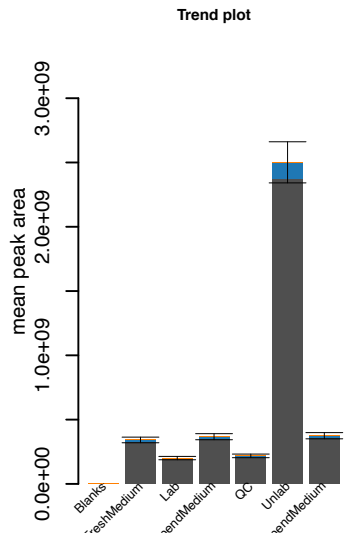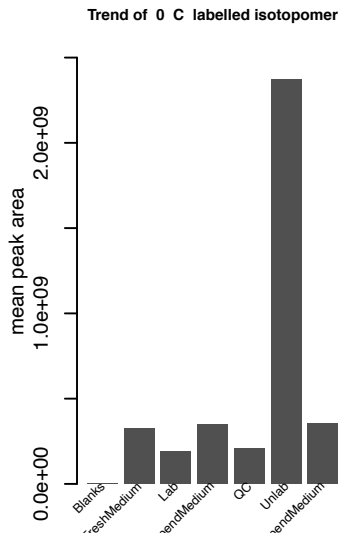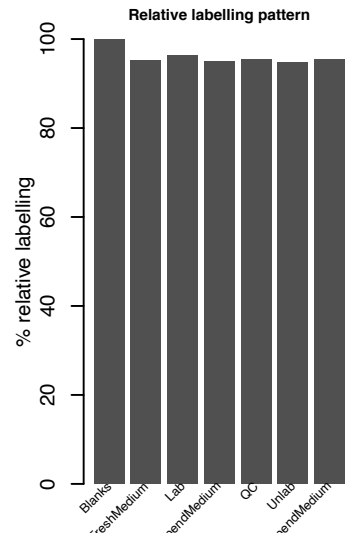

# L-Glutamine

Formula: C<sub>5</sub>H<sub>10</sub>N<sub>2</sub>O<sub>3</sub> Mass: 146.069 Std.RT: 739.2 Ion: NEG

# G1

■ UL ■ +1 ■ +2 ■ +3 ■ +4 ■ +5

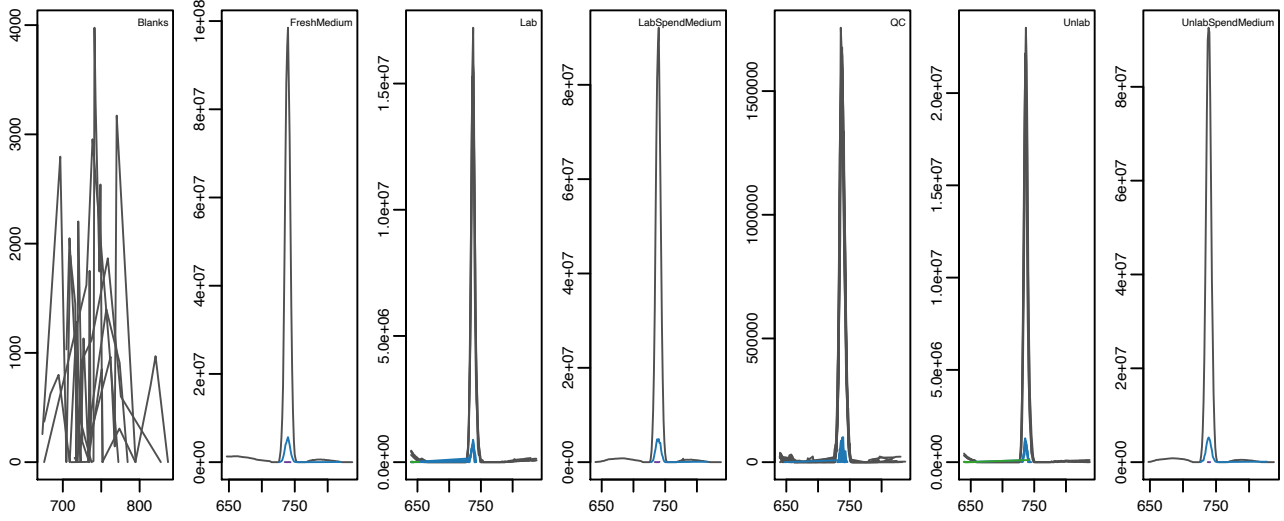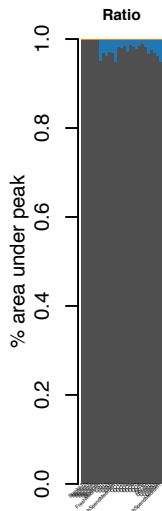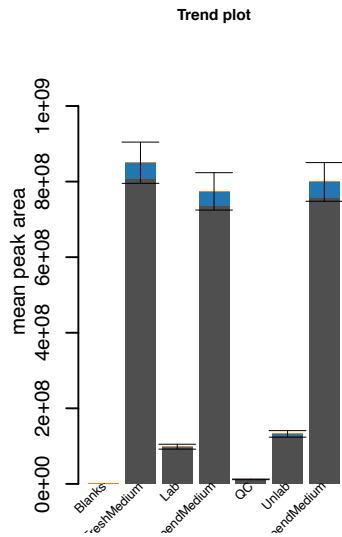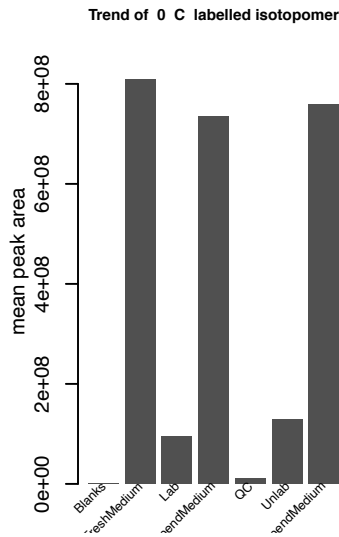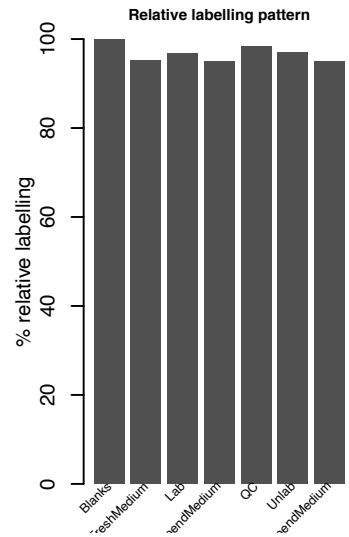

# L-Lysine

Formula: C<sub>6</sub>H<sub>14</sub>N<sub>2</sub>O<sub>2</sub> Mass: 146.106 Std.RT: 1111.8 Ion: NEG

# G1

■ UL ■ +1 ■ +2 ■ +3 ■ +4 ■ +5 ■ +6

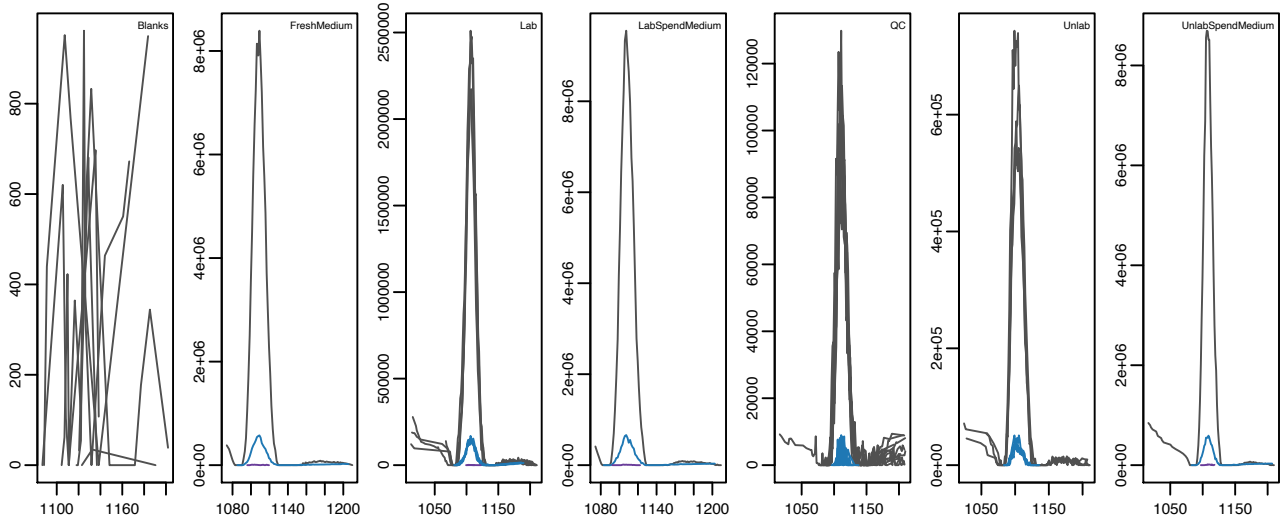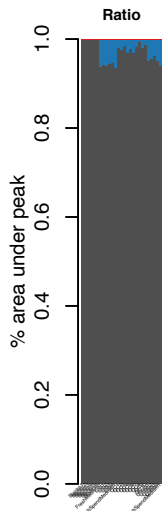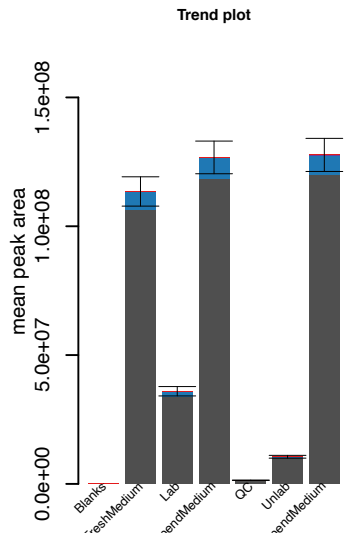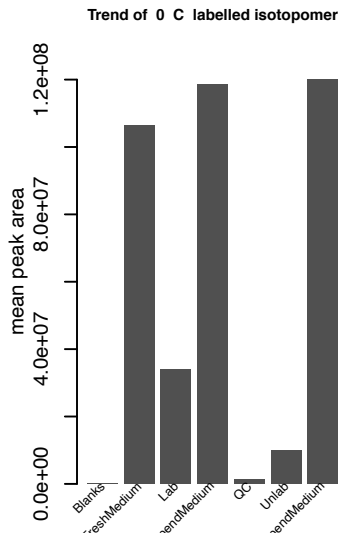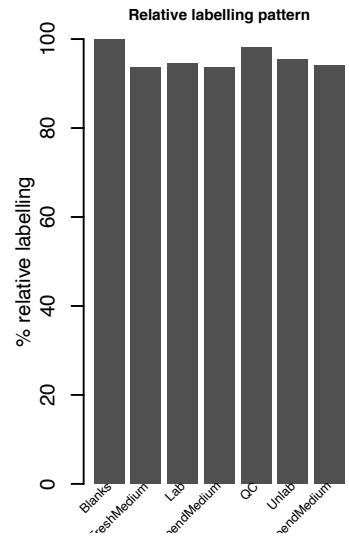

# L-Methionine

Formula: C<sub>5</sub>H<sub>11</sub>NO<sub>2</sub>S Mass: 149.051 Std.RT: 613.8 Ion: NEG

# G1

■ UL ■ +1 ■ +2 ■ +3 ■ +4 ■ +5

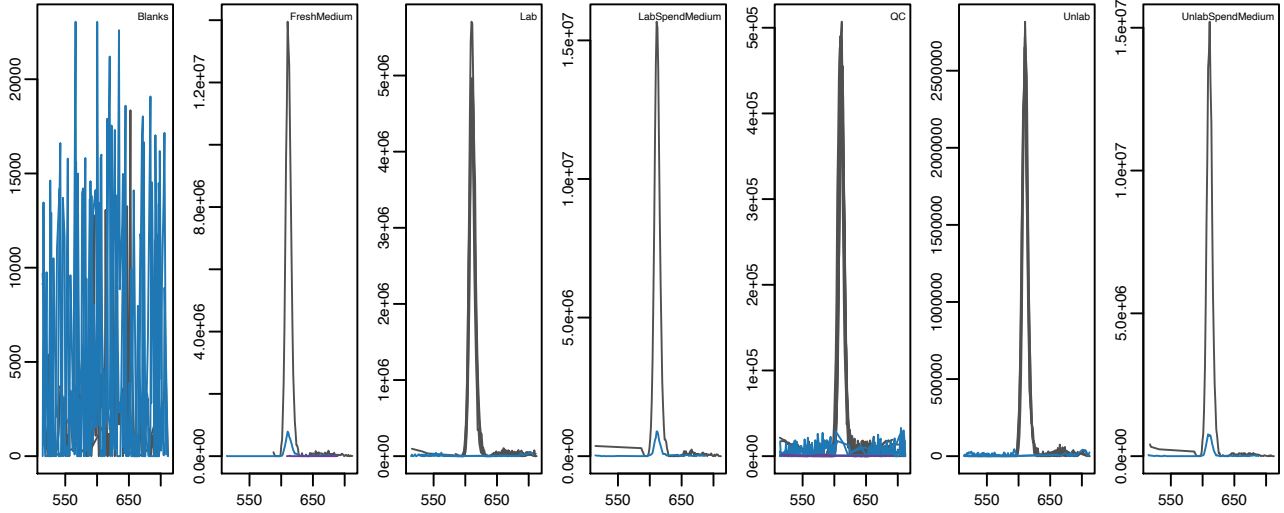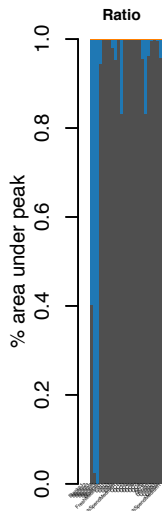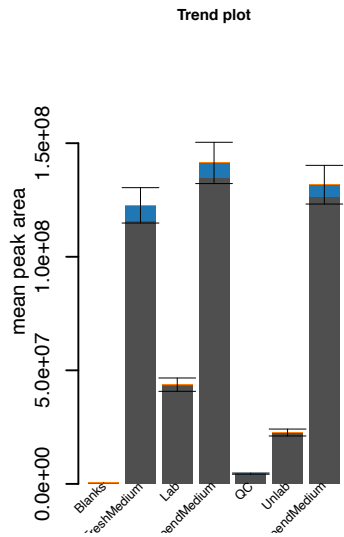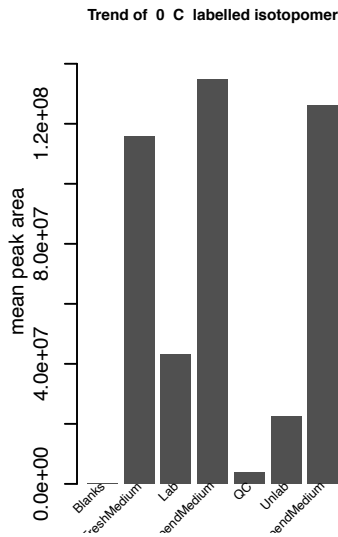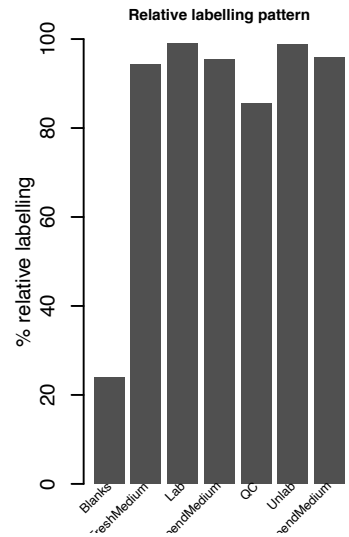



# L-Ornithine

Formula: C<sub>5</sub>H<sub>12</sub>N<sub>2</sub>O<sub>2</sub> Mass: 132.09 Std.RT: 1044 Ion: NEG

# G1

■ UL ■ +1 ■ +2 ■ +3 ■ +4 ■ +5

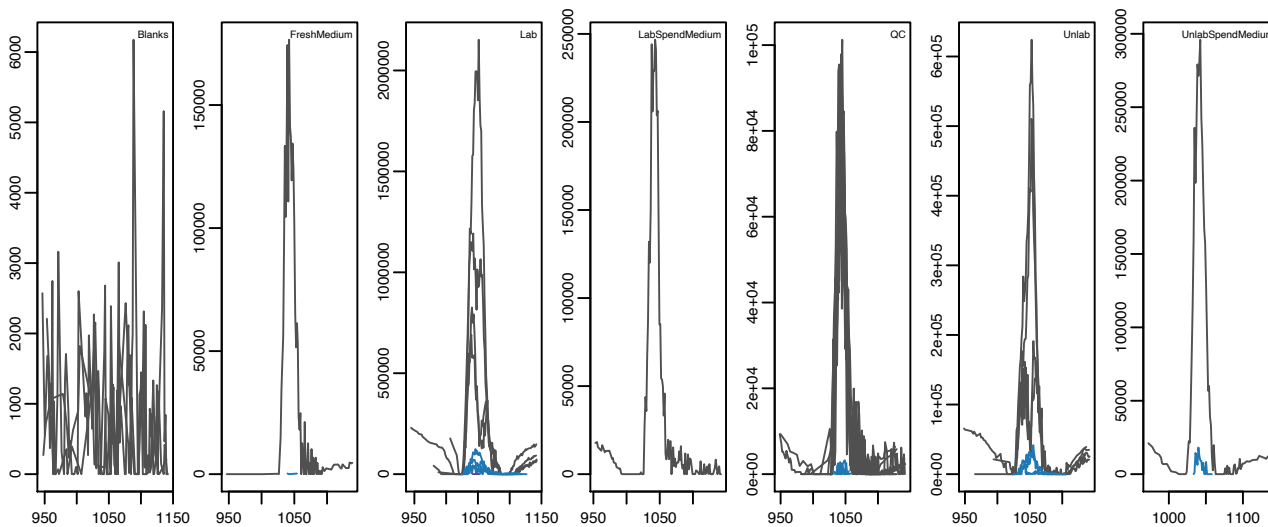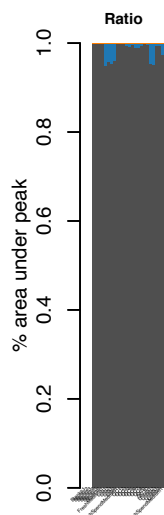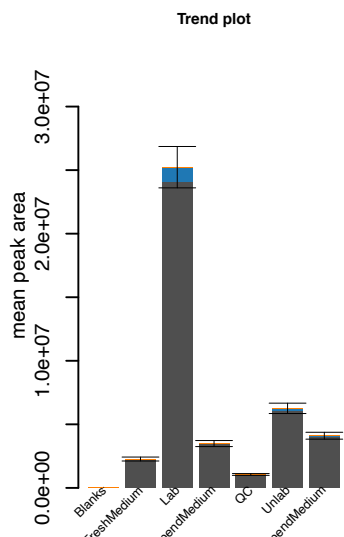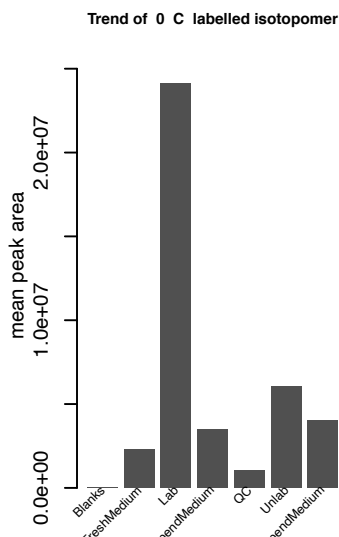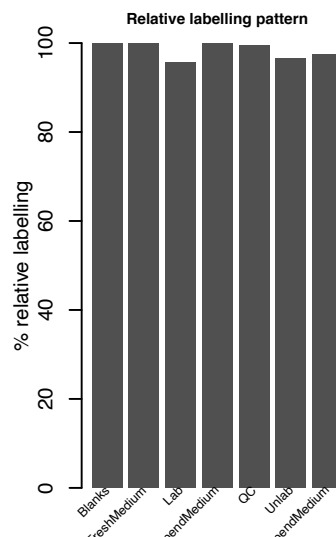

# L-Phenylalanine

Formula: C<sub>9</sub>H<sub>11</sub>NO<sub>2</sub> Mass: 165.079 Std.RT: 552.6 Ion: NEG

# G1

■ UL ■ +1 ■ +2 ■ +3 ■ +4 ■ +5 ■ +6 ■ +7 ■ +8 ■ +9

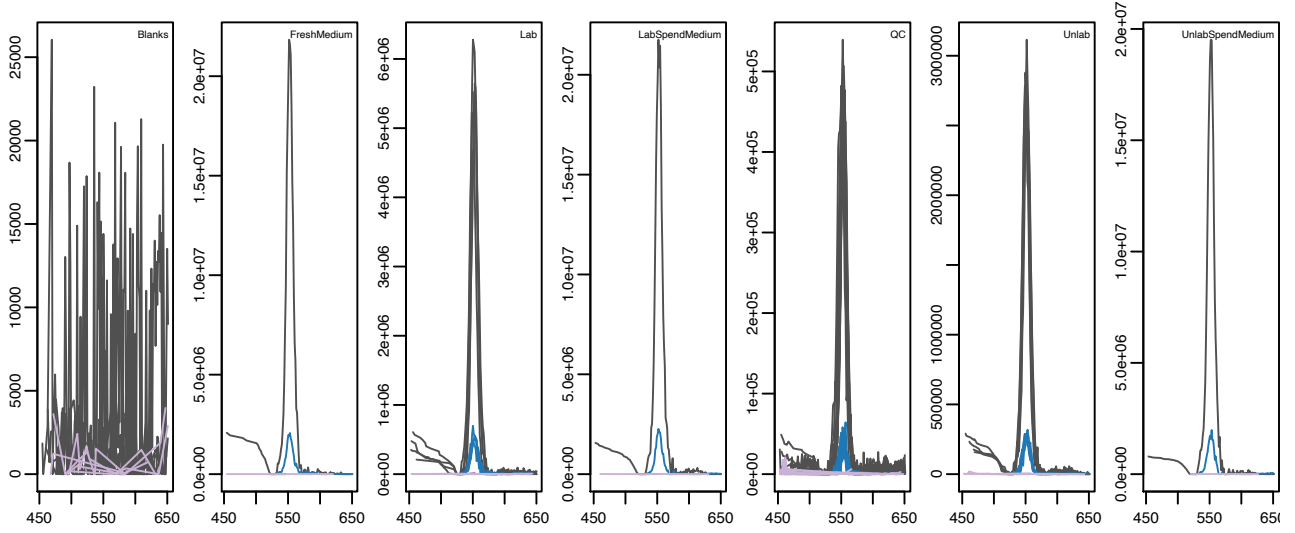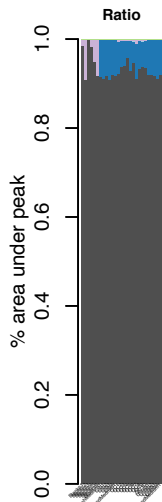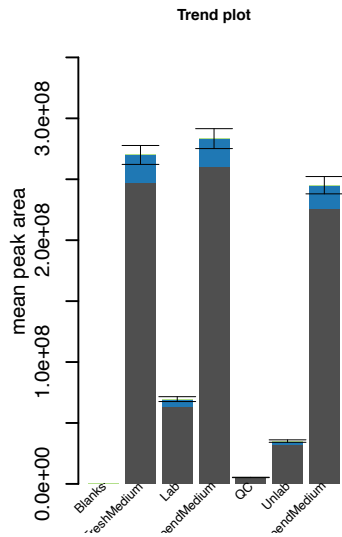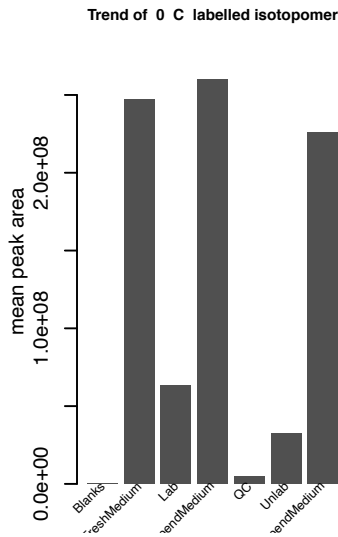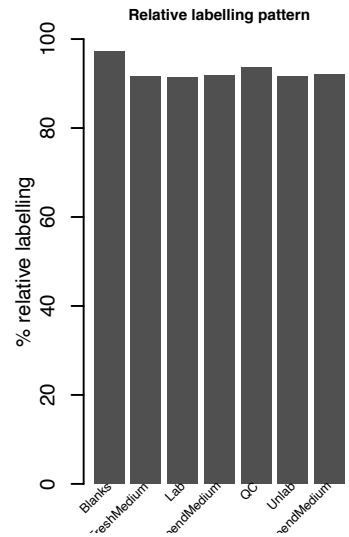

# L-Proline

Formula: C<sub>5</sub>H<sub>9</sub>NO<sub>2</sub> Mass: 115.063 Std.RT: 661.2 Ion: NEG

# G1

■ UL ■ +1 ■ +2 ■ +3 ■ +4 ■ +5

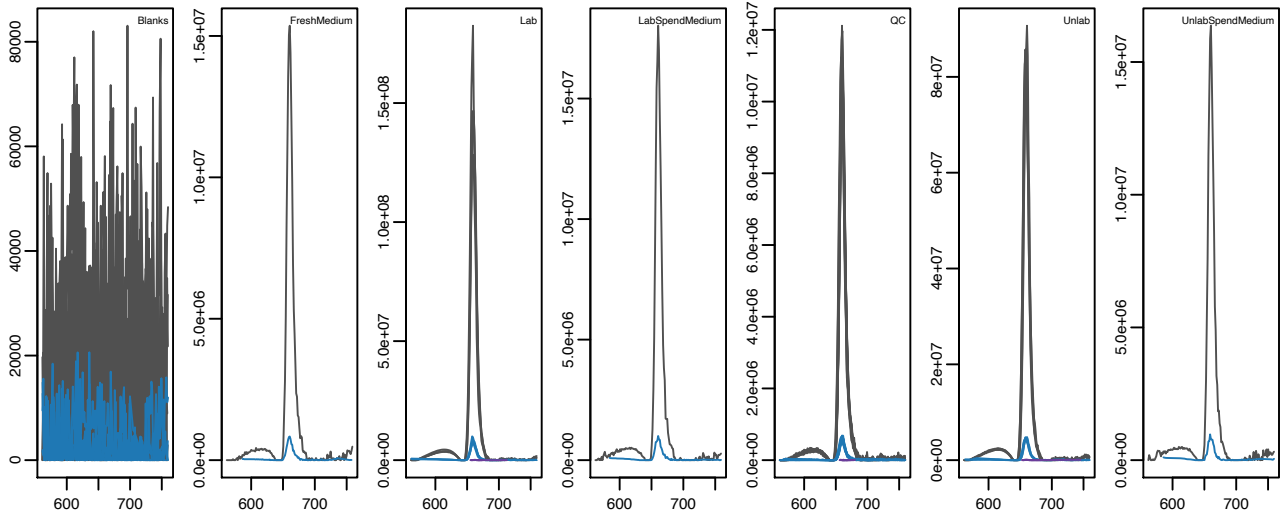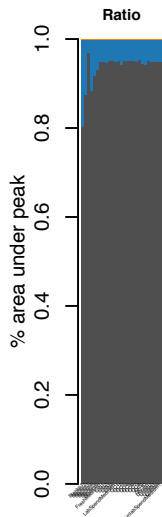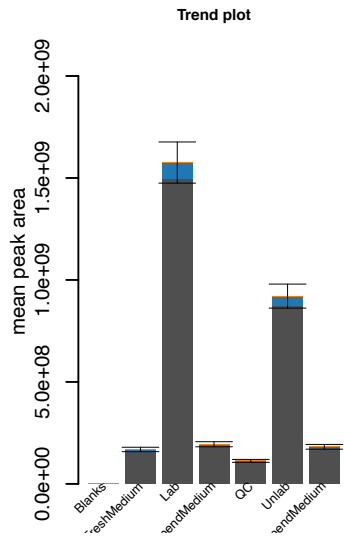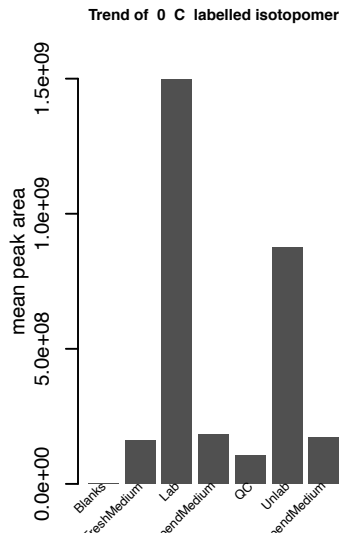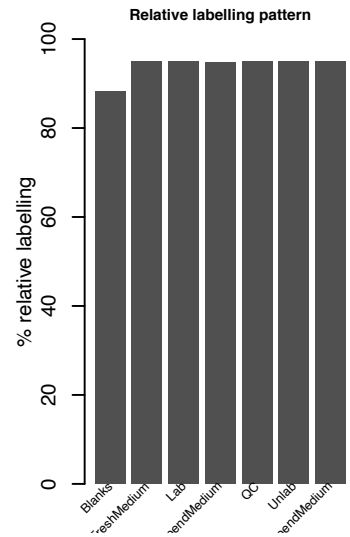

# L-Serine

Formula: C<sub>3</sub>H<sub>7</sub>NO<sub>3</sub> Mass: 105.043 Std.RT: 775.2 Ion: NEG

# G1

■ UL ■ +1 ■ +2 ■ +3

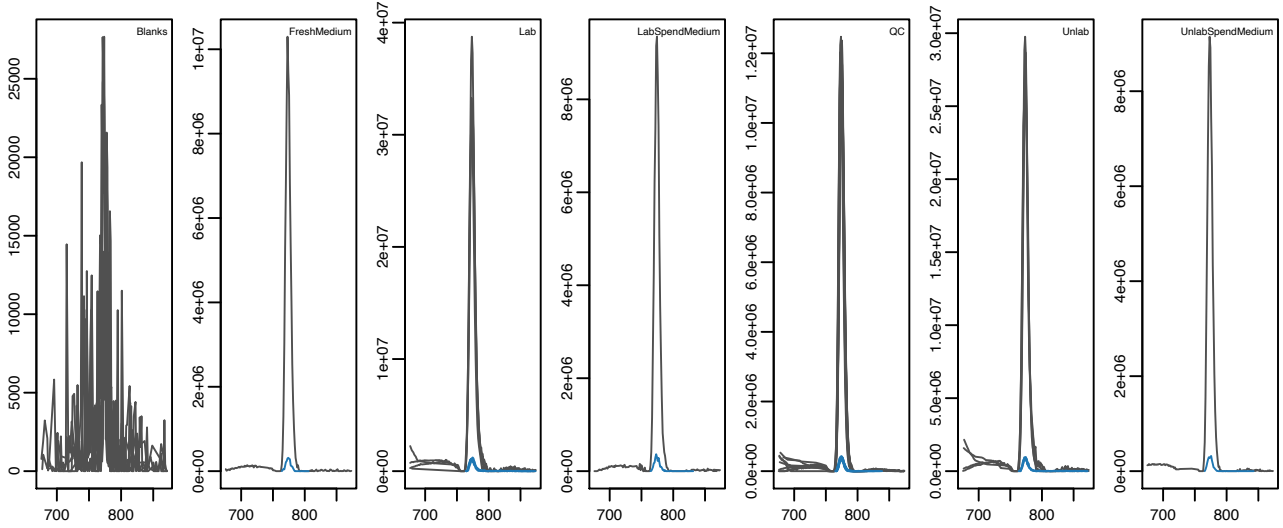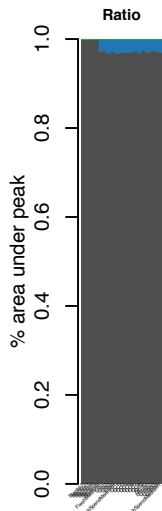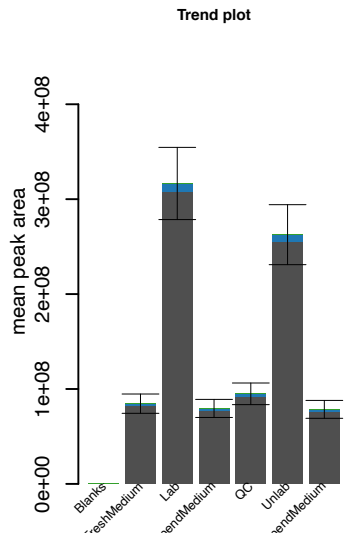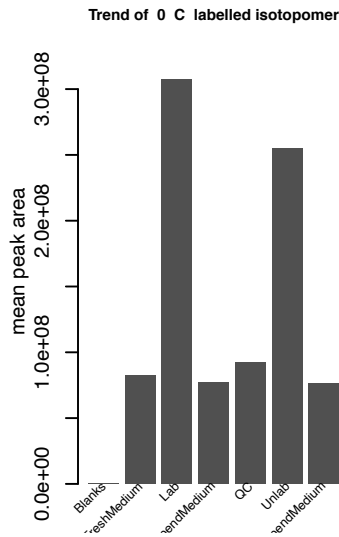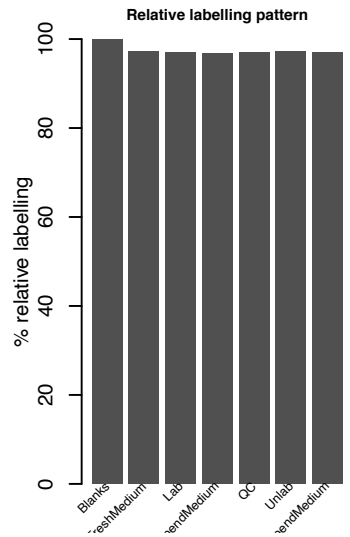

# L-Threonine

Formula: C<sub>4</sub>H<sub>9</sub>NO<sub>3</sub> Mass: 119.058 Std.RT: 728.4 Ion: NEG

# G1

■ UL ■ +1 ■ +2 ■ +3 ■ +4

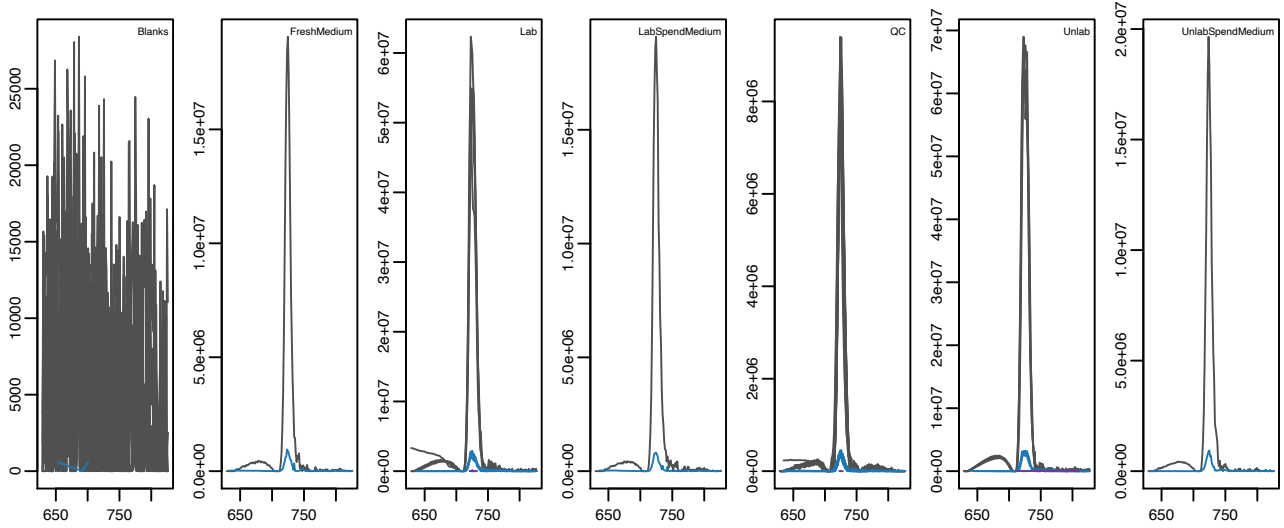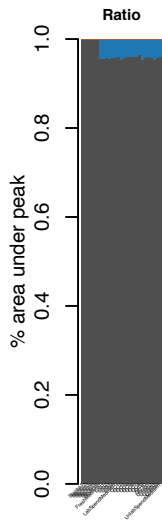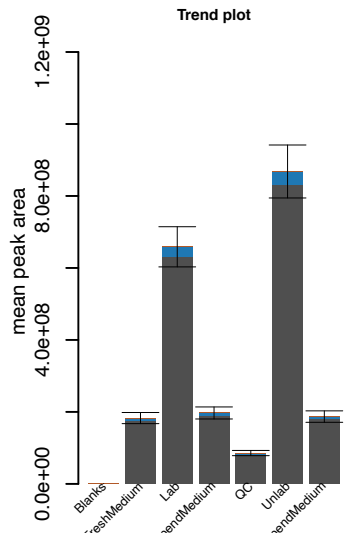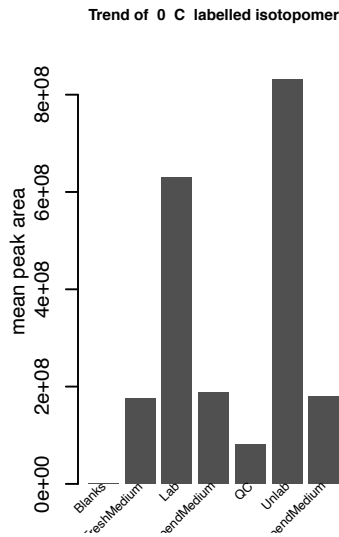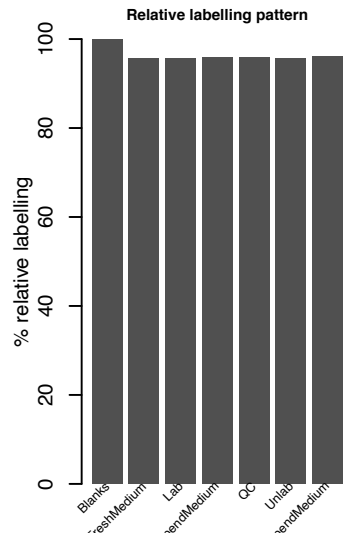

# L-Tryptophan

Formula: C<sub>11</sub>H<sub>12</sub>N<sub>2</sub>O<sub>2</sub> Mass: 204.09 Std.RT: 630 Ion: NEG

# G1

■ UL ■ +1 ■ +2 ■ +3 ■ +4 ■ +5 ■ +6 ■ +7 ■ +8 ■ +9 ■ +10 ■ +11

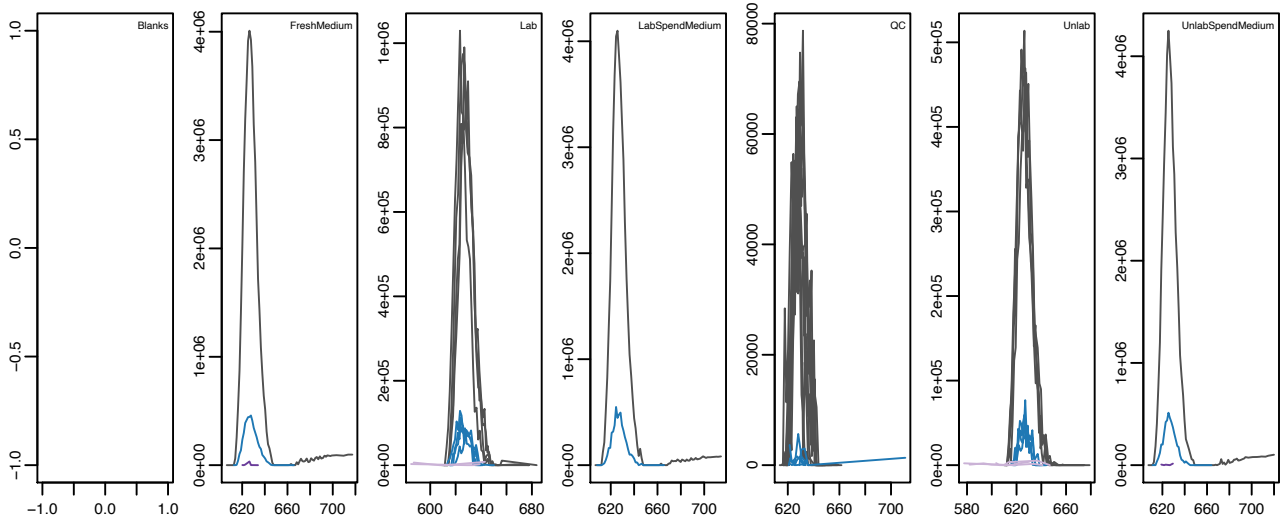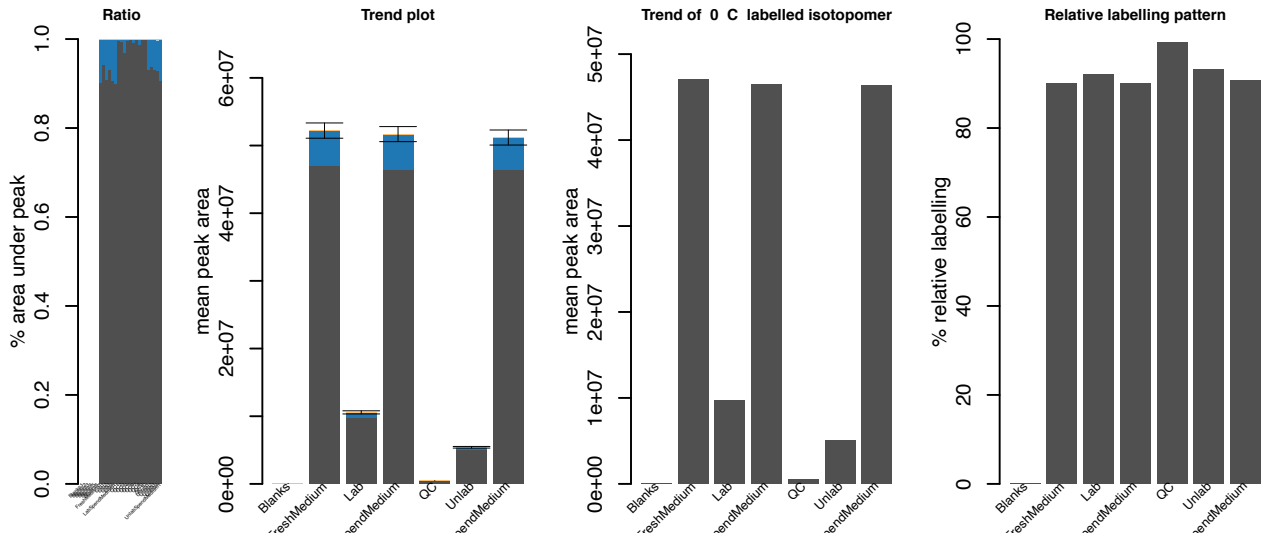

# L-Tyrosine

Formula: C<sub>9</sub>H<sub>11</sub>NO<sub>3</sub> Mass: 181.074 Std.RT: 680.4 Ion: NEG

# G1

■ UL ■ +1 ■ +2 ■ +3 ■ +4 ■ +5 ■ +6 ■ +7 ■ +8 ■ +9

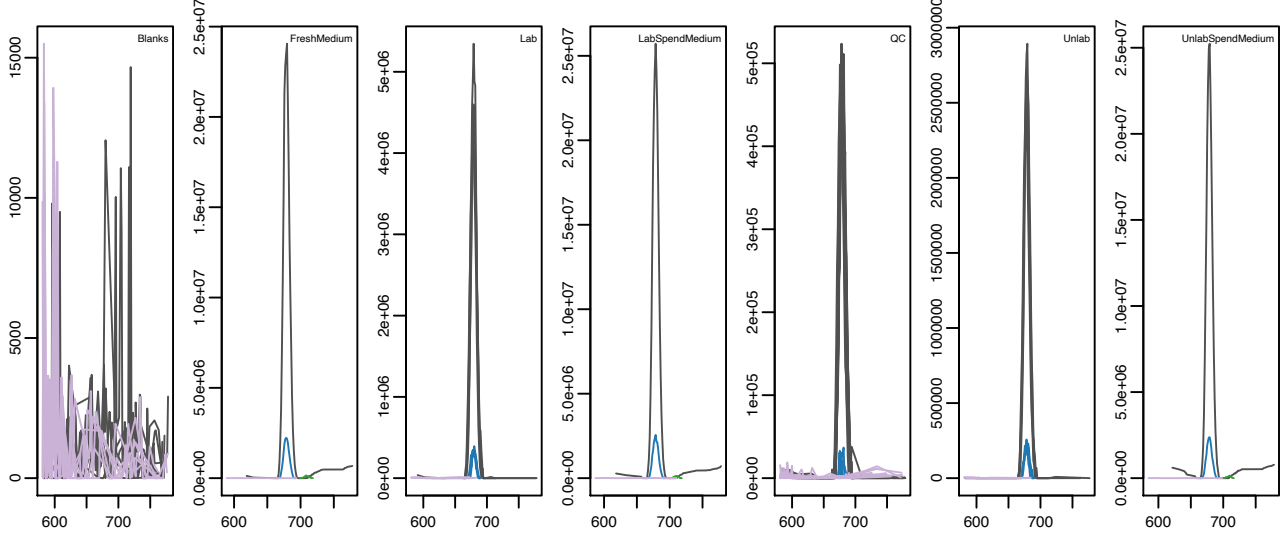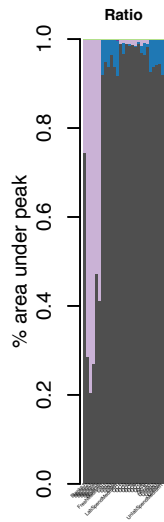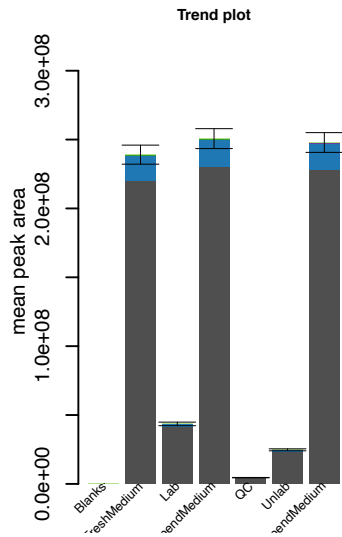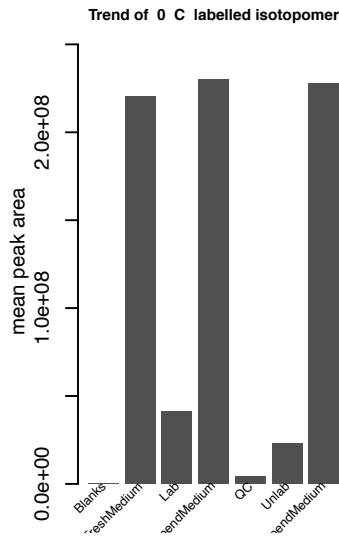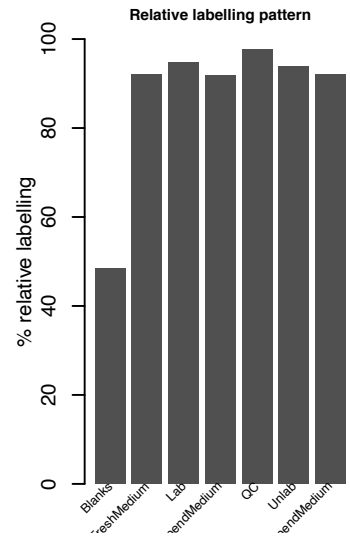

# L-Valine

Formula: C<sub>5</sub>H<sub>11</sub>NO<sub>2</sub> Mass: 117.079 Std.RT: 651 Ion: NEG

# G1

■UL ■+1 ■+2 ■+3 ■+4 ■+5

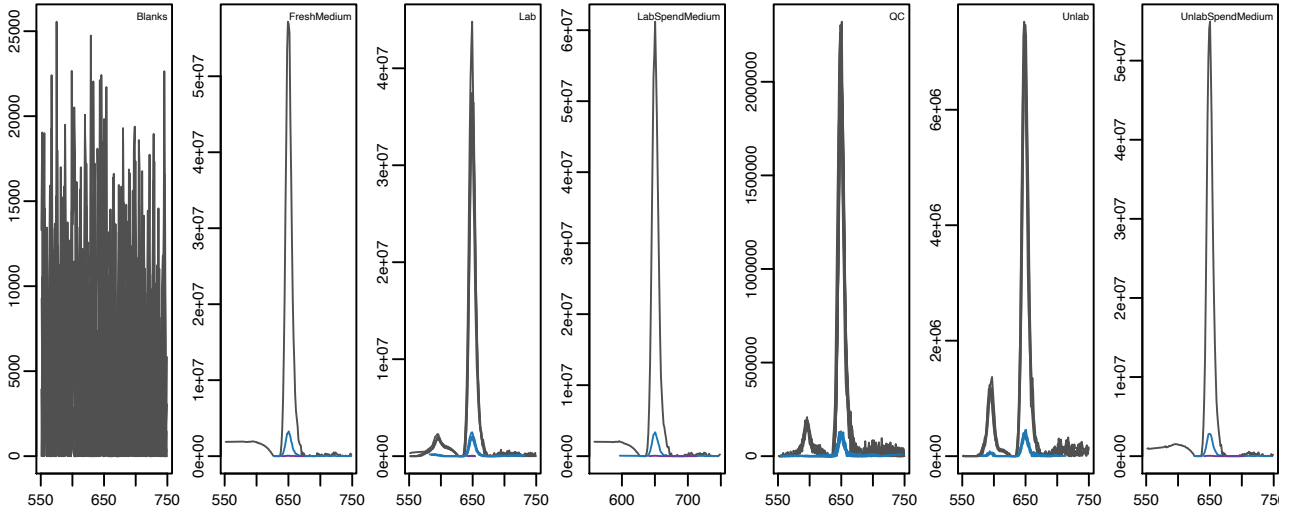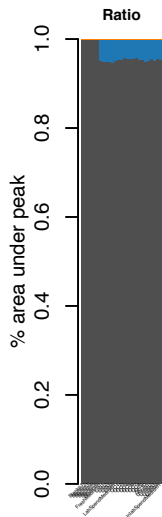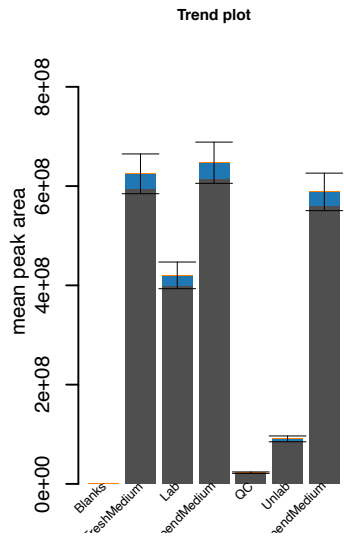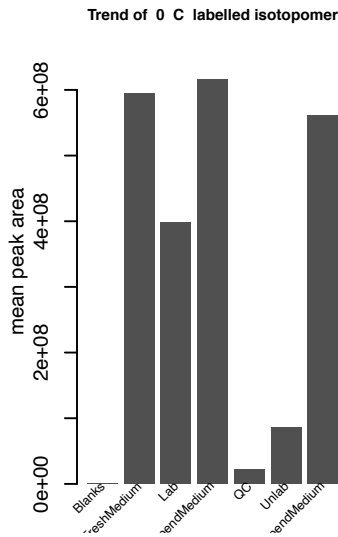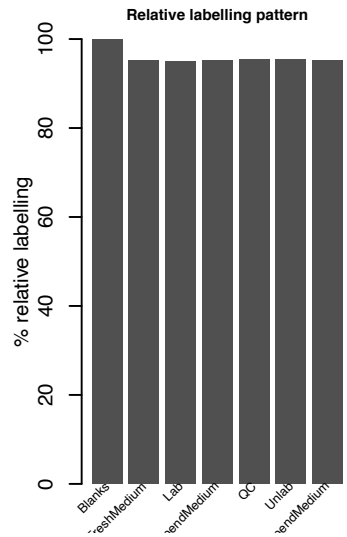



# L-isoIeucine

Formula: C<sub>6</sub>H<sub>13</sub>NO<sub>2</sub> Mass: 131.095 Std.RT: 623.4 Ion: NEG

# G1

■ UL ■ +1 ■ +2 ■ +3 ■ +4 ■ +5 ■ +6

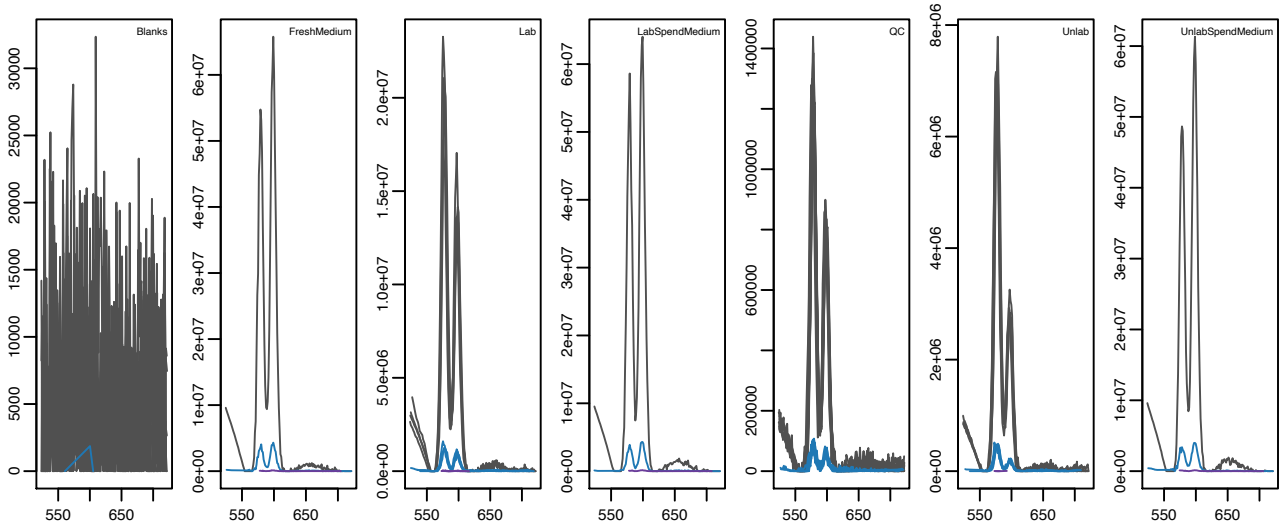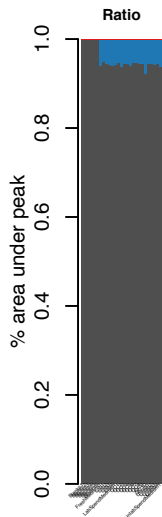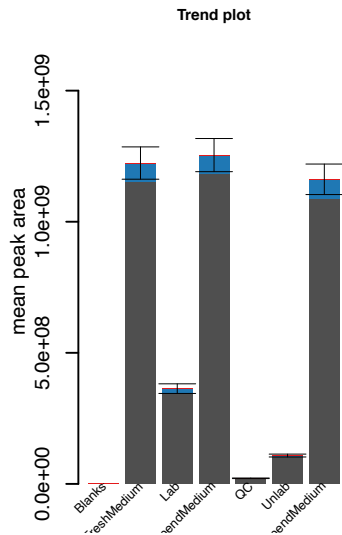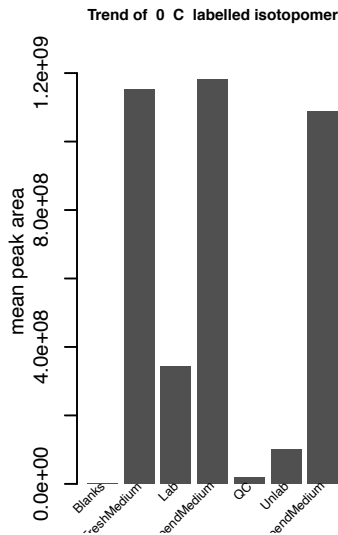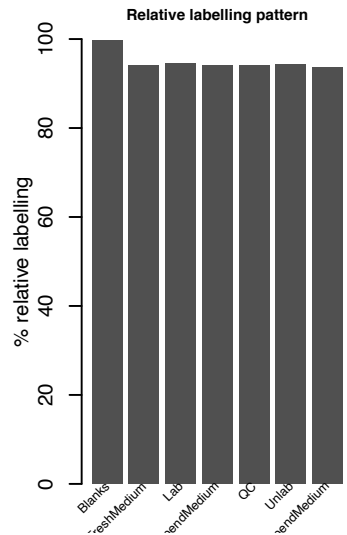

# N-Acetylornithine

Formula: C<sub>7</sub>H<sub>14</sub>N<sub>2</sub>O<sub>3</sub> Mass: 174.1 Std.RT: 735 Ion: NEG

# G1

■ UL ■ +1 ■ +2 ■ +3 ■ +4 ■ +5 ■ +6 ■ +7

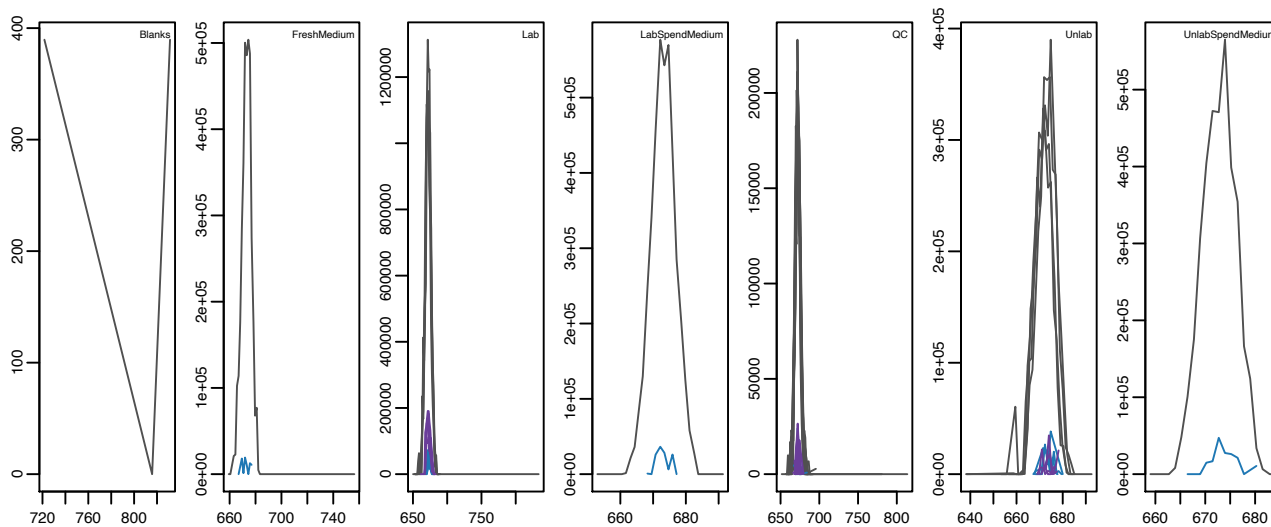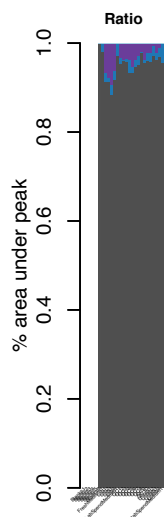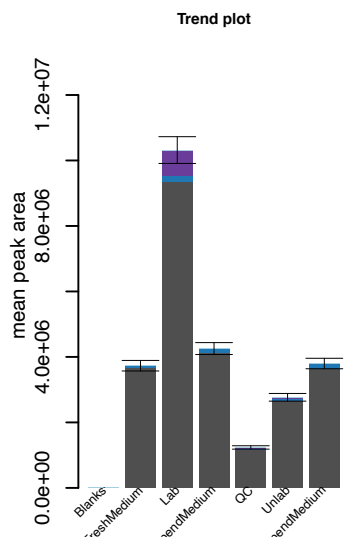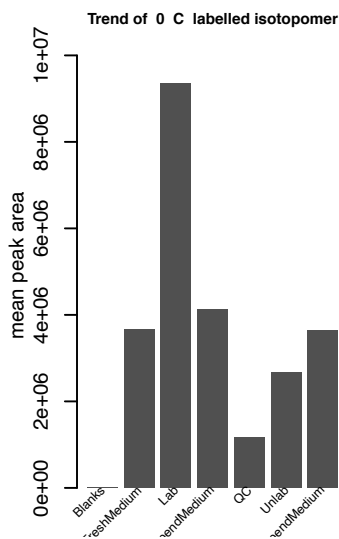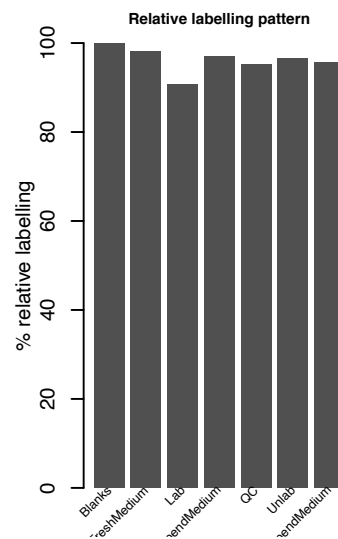



# Nicotinamide

Formula: C<sub>6</sub>H<sub>6</sub>N<sub>2</sub>O Mass: 122.048 Std.RT: 389.4 Ion: NEG

# G1

■ UL ■ +1 ■ +2 ■ +3 ■ +4 ■ +5 ■ +6

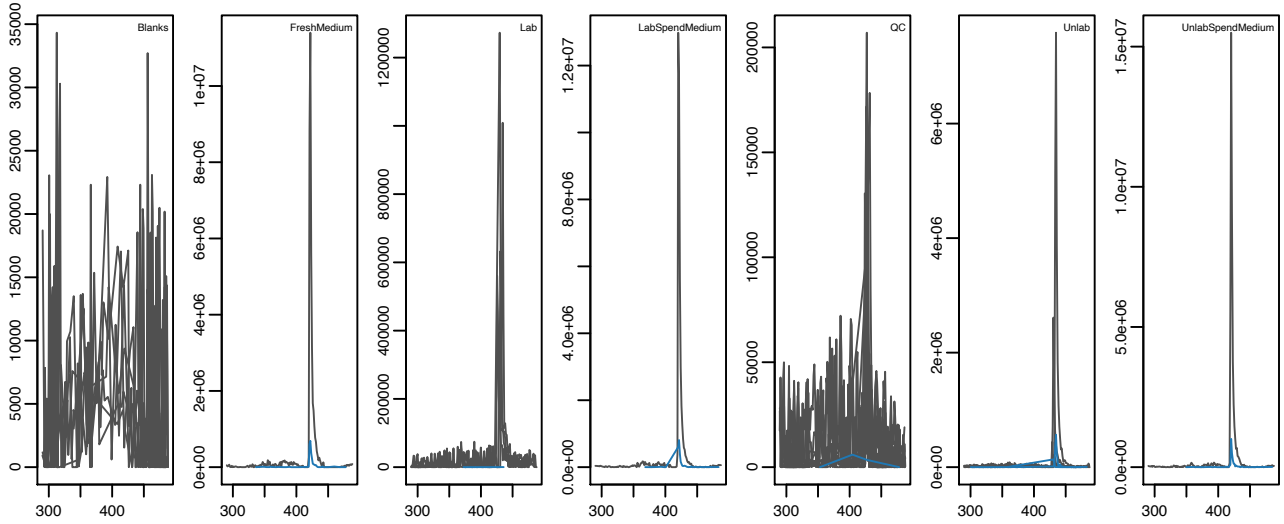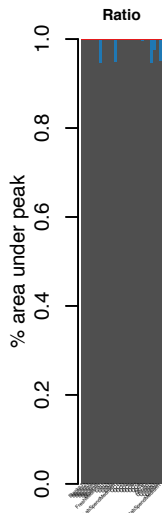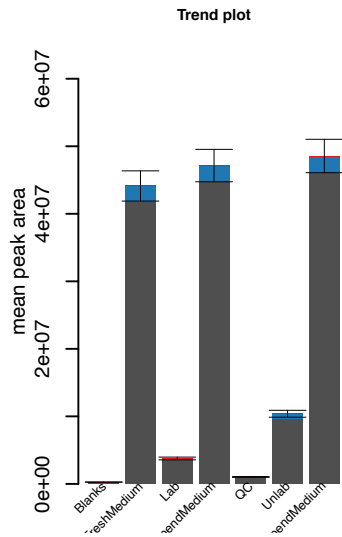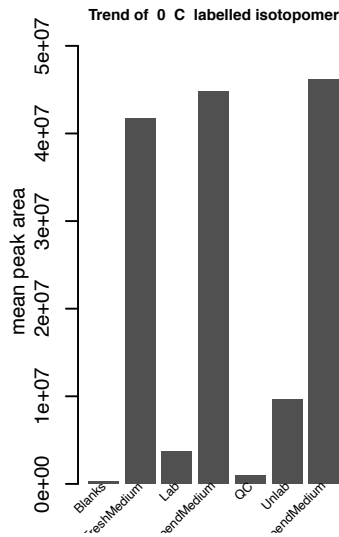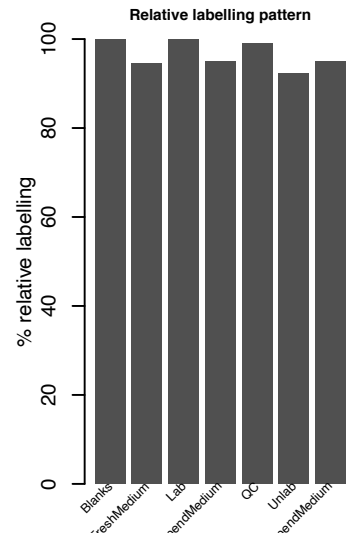

# Nicotinate

Formula: C<sub>6</sub>H<sub>5</sub>NO<sub>2</sub> Mass: 123.032 Std.RT: 435 Ion: NEG

# G1

■ UL ■ +1 ■ +2 ■ +3 ■ +4 ■ +5 ■ +6

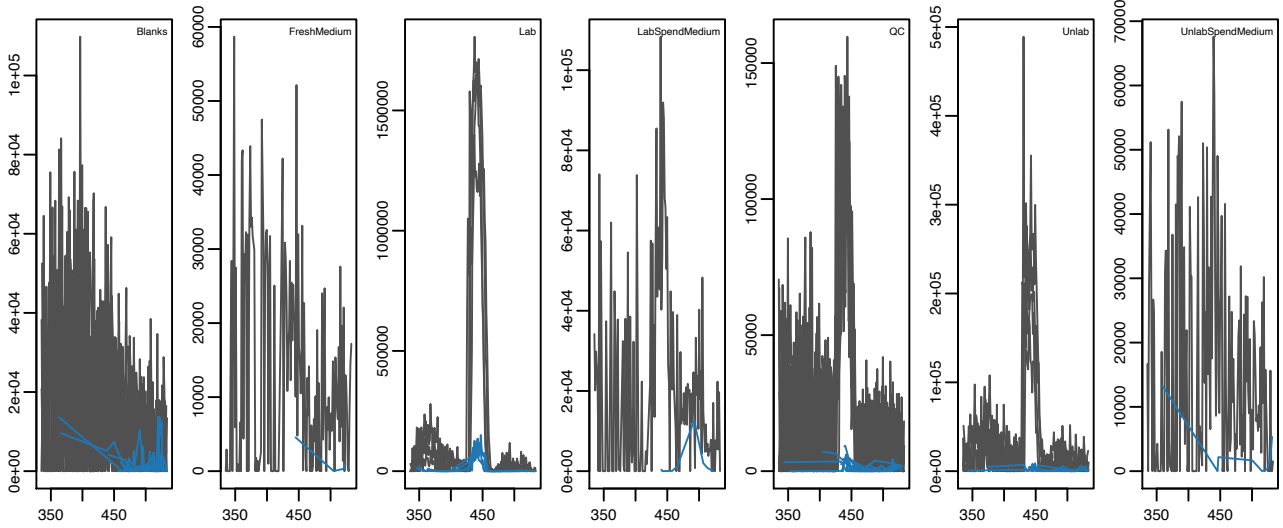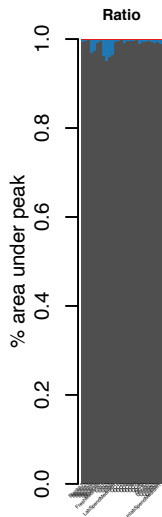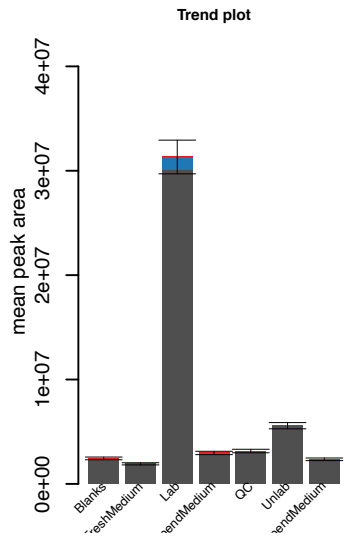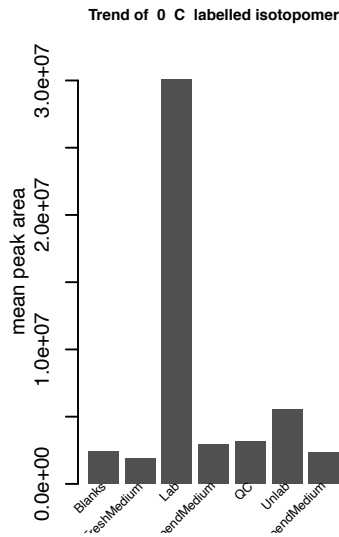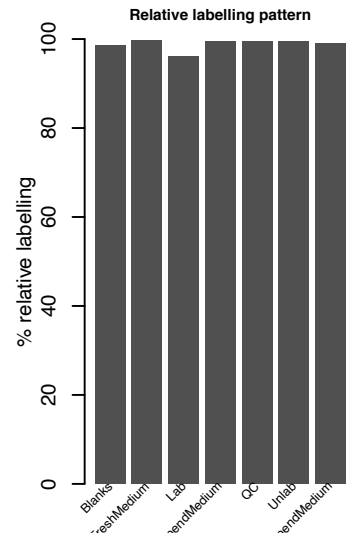

# O-Acetyl-L-serine

Formula: C<sub>5</sub>H<sub>9</sub>NO<sub>4</sub> Mass: 147.053 Std.RT: 701.4 Ion: NEG

# G1

■ UL ■ +1 ■ +2 ■ +3 ■ +4 ■ +5

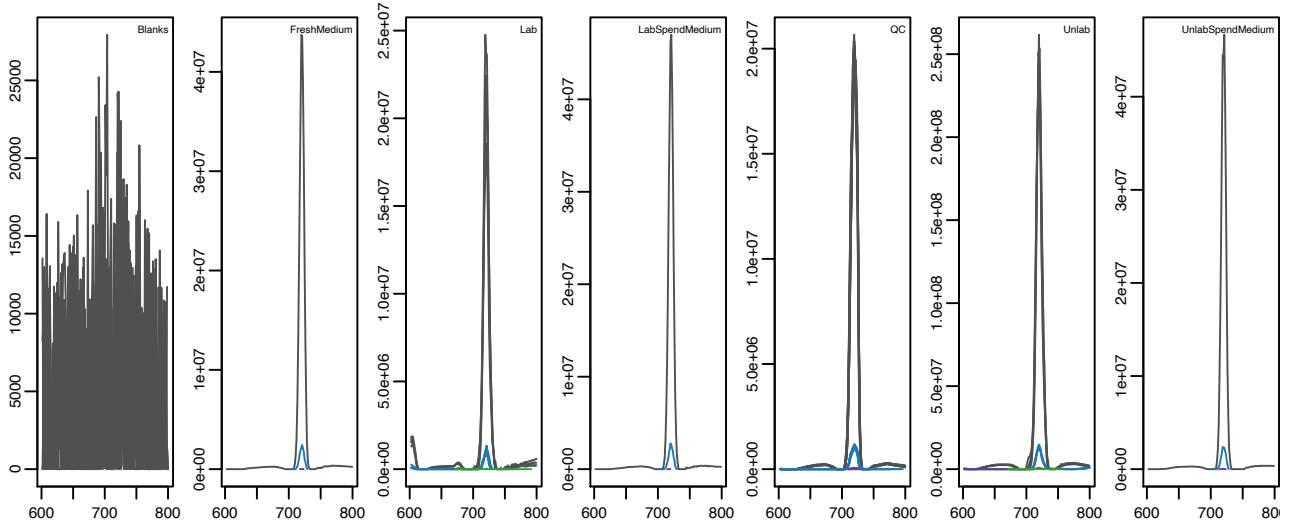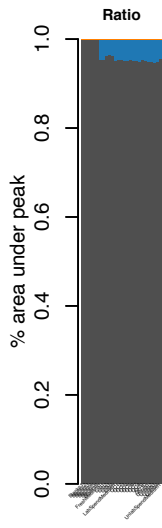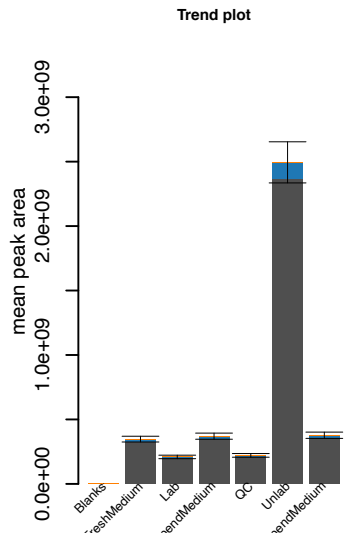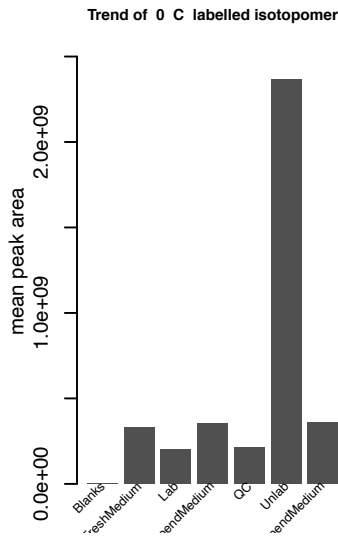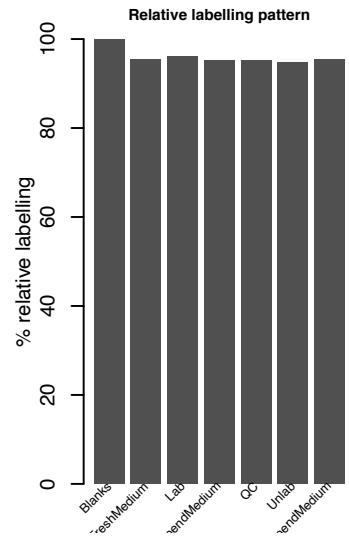

# Orotate

Formula: C<sub>5</sub>H<sub>4</sub>N<sub>2</sub>O<sub>4</sub> Mass: 156.017 Std.RT: 586.8 Ion: NEG

# G1

■ UL ■ +1 ■ +2 ■ +3 ■ +4 ■ +5

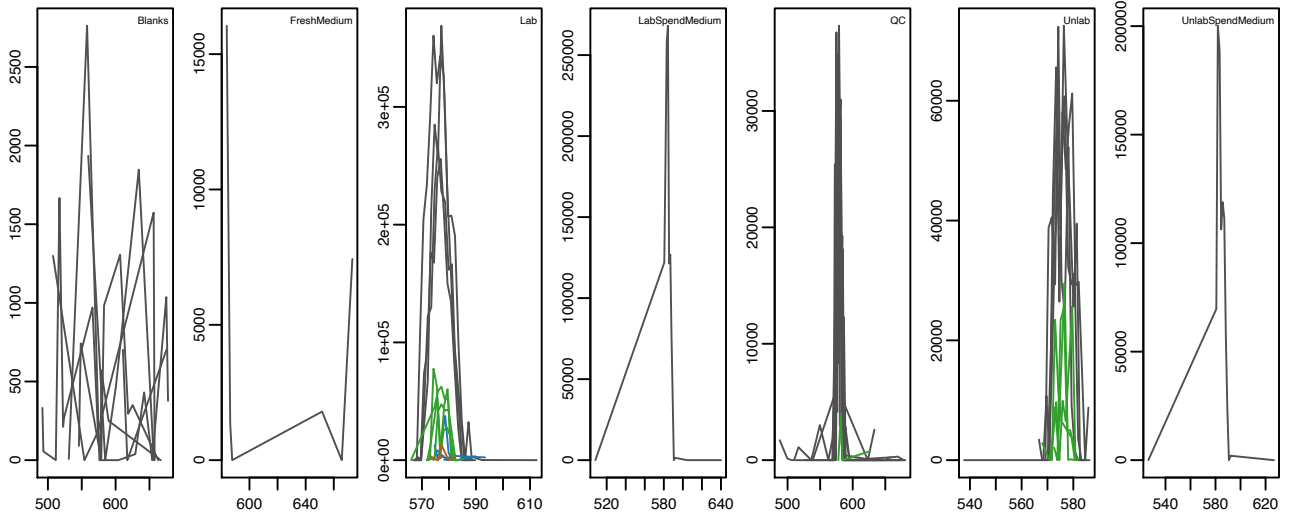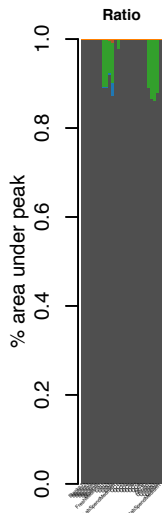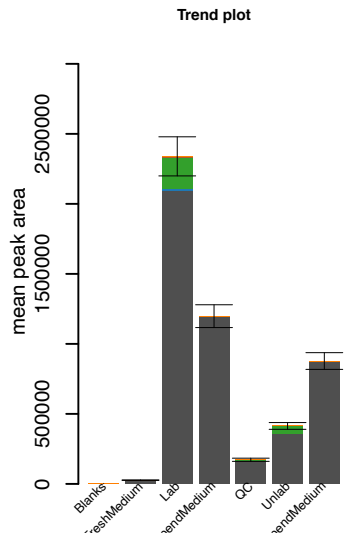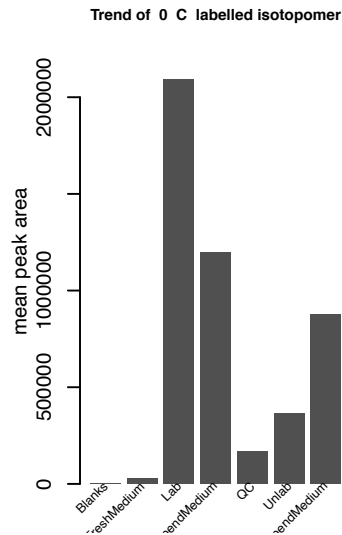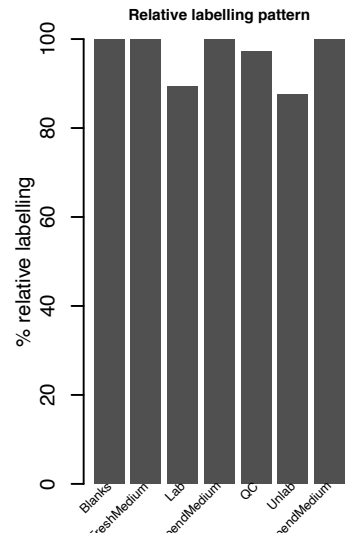

# Pantothenate

Formula: C<sub>9</sub>H<sub>17</sub>NO<sub>5</sub> Mass: 219.111 Std.RT: 487.2 Ion: NEG

# G1

■ UL ■ +1 ■ +2 ■ +3 ■ +4 ■ +5 ■ +6 ■ +7 ■ +8 ■ +9

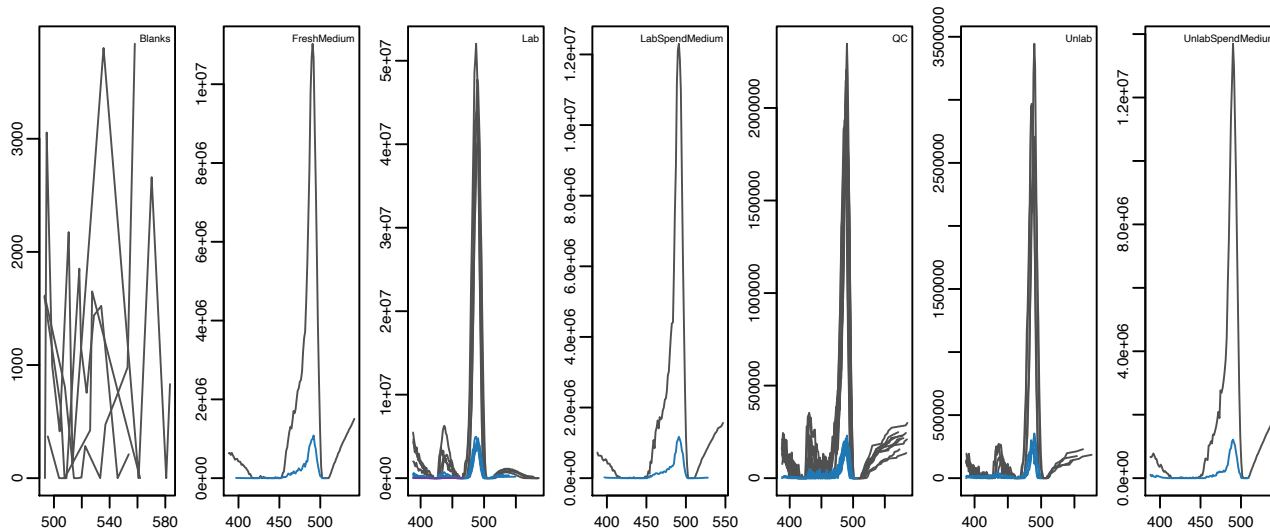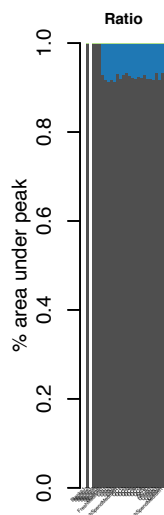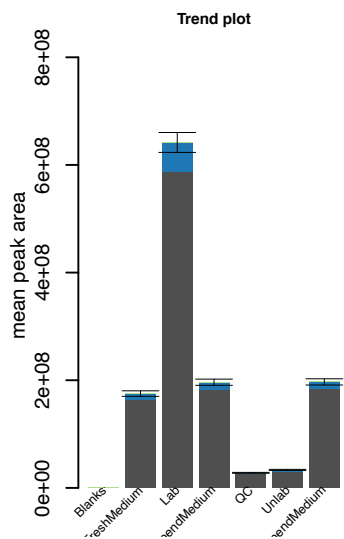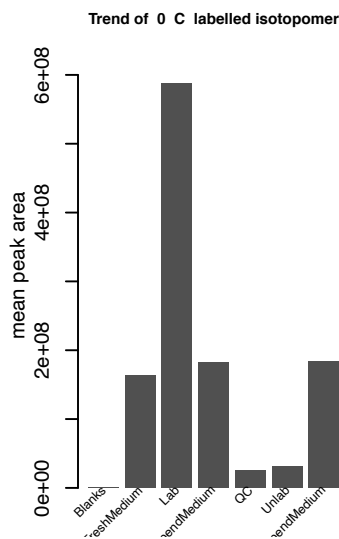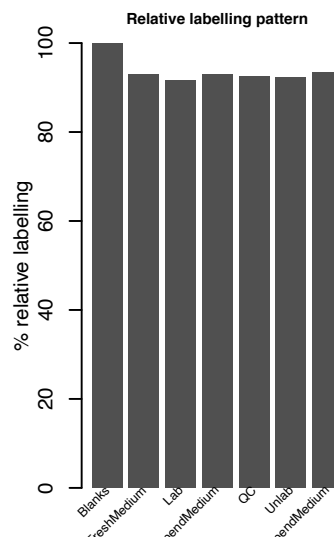



# Phenylpyruvate

Formula: C<sub>9</sub>H<sub>8</sub>O<sub>3</sub> Mass: 164.047 Std.RT: 274.2 Ion: NEG

# G1

■ UL ■+1 ■+2 ■+3 ■+4 ■+5 ■+6 ■+7 ■+8 ■+9

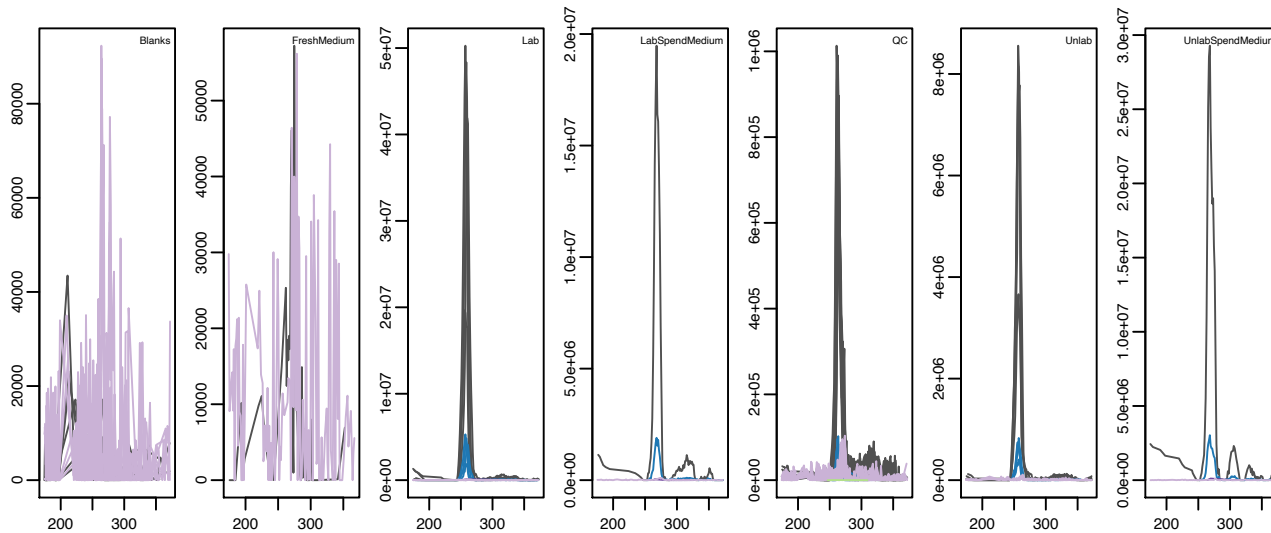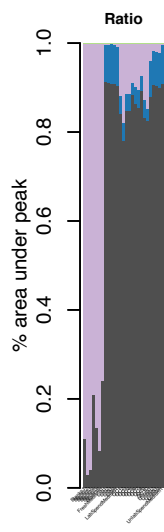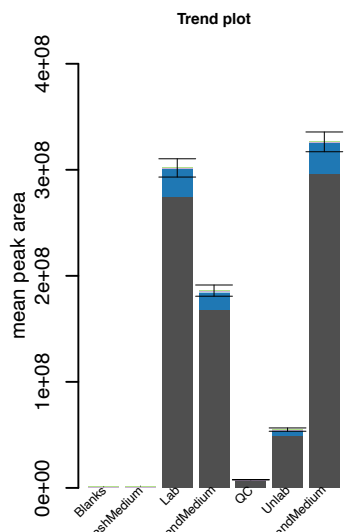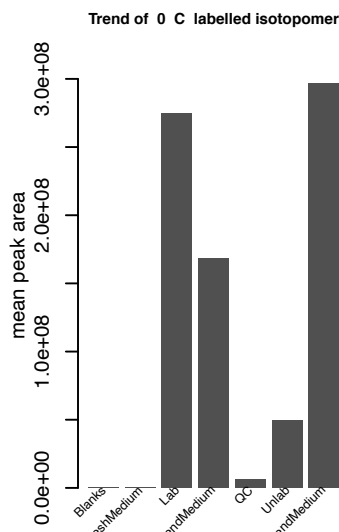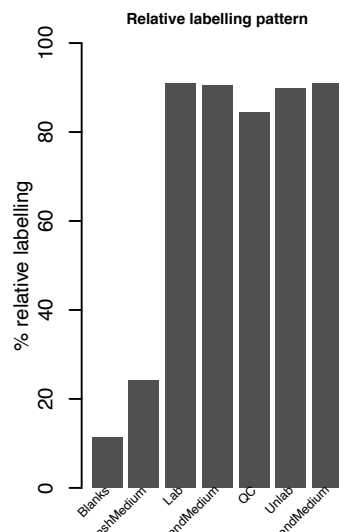

# Phosphoenolpyruvate

Formula: C<sub>3</sub>H<sub>5</sub>O<sub>6</sub>P Mass: 167.982 Std.RT: 811.8 Ion: NEG

# G1

■ UL ■ +1 ■ +2 ■ +3

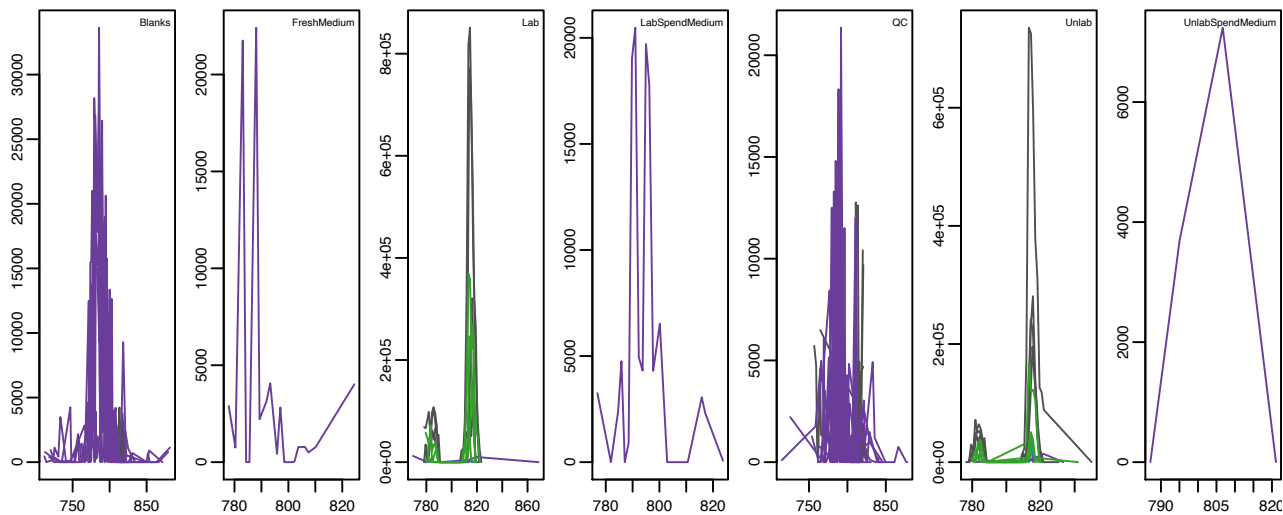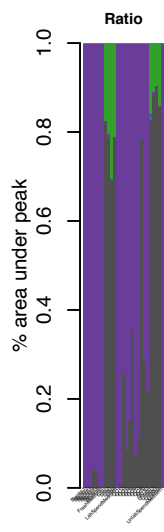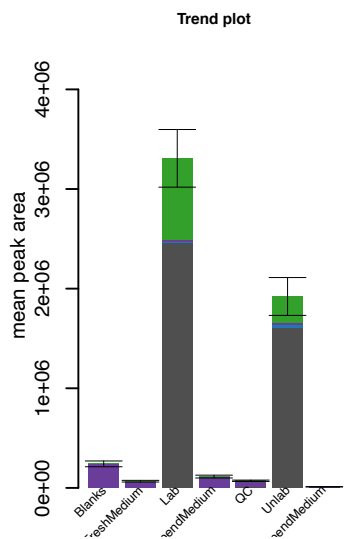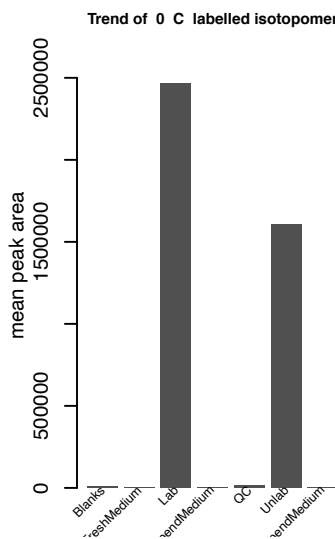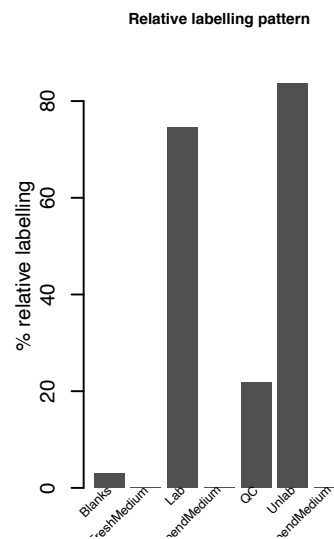

# Pyruvate

Formula: C3H4O3 Mass: 88.016 Std.RT: 490.2 Ion: NEG

# G1

■UL ■+1 ■+2 ■+3

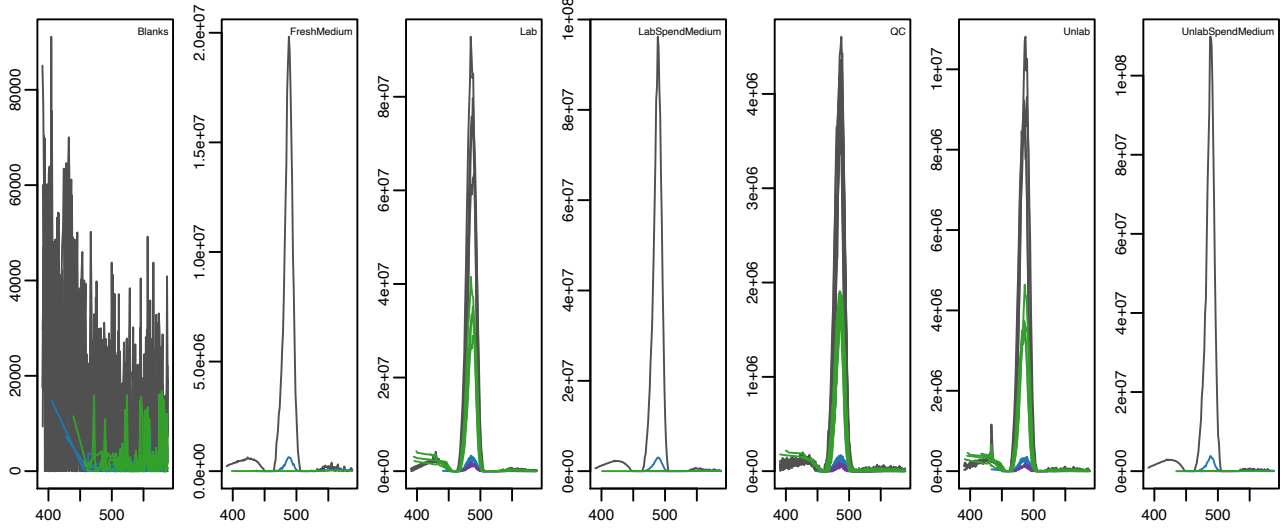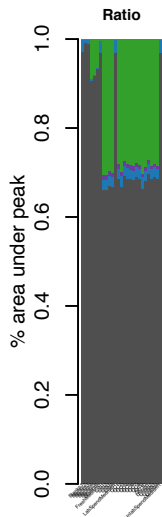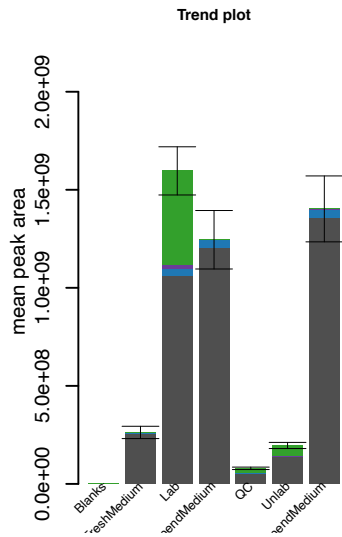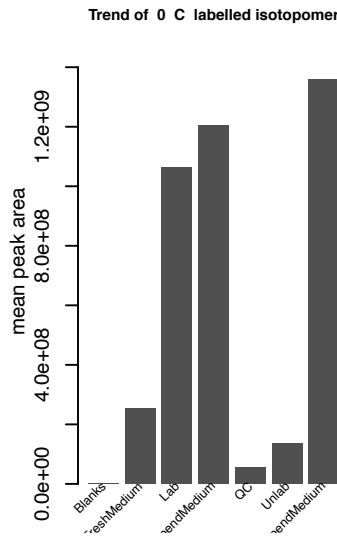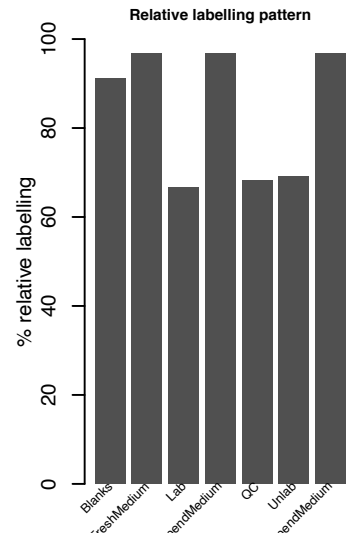

# Succinate

Formula: C<sub>4</sub>H<sub>6</sub>O<sub>4</sub> Mass: 118.027 Std.RT: 744.6 Ion: NEG

# G1

■ UL ■ +1 ■ +2 ■ +3 ■ +4

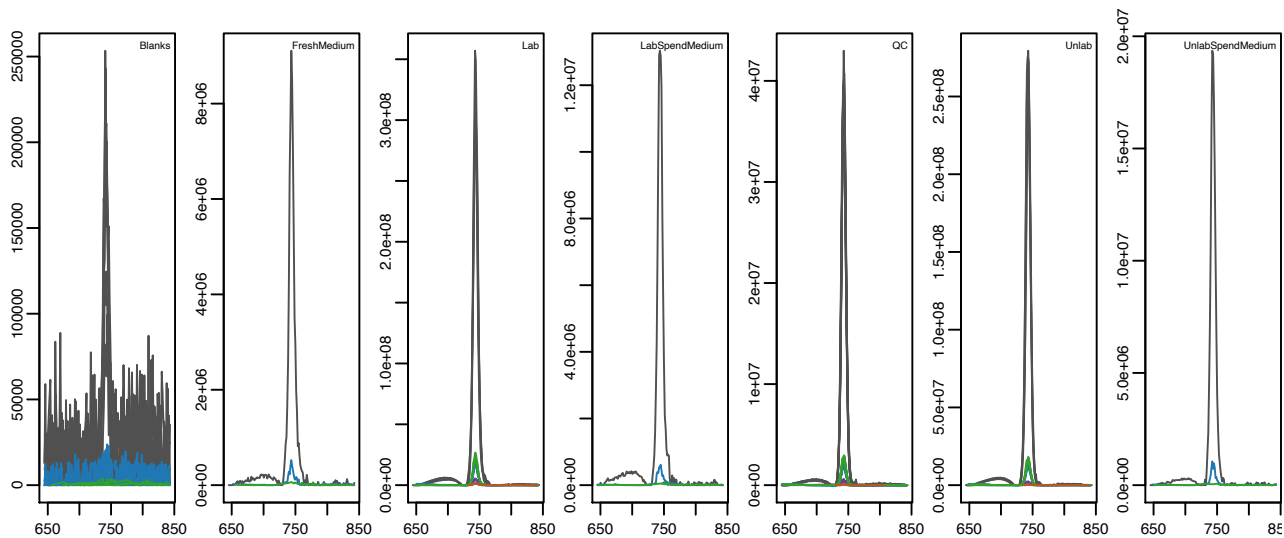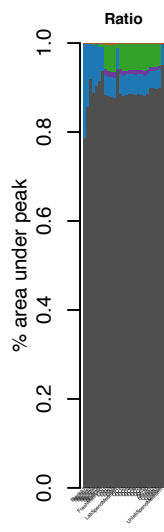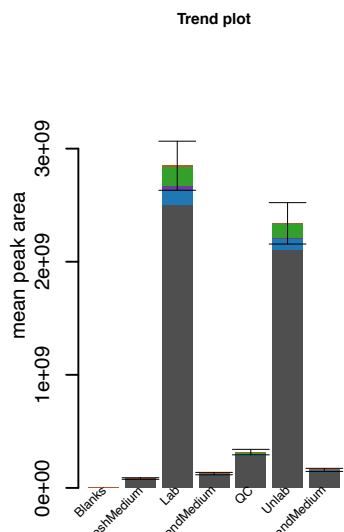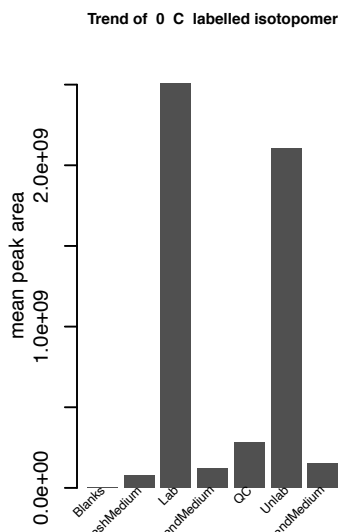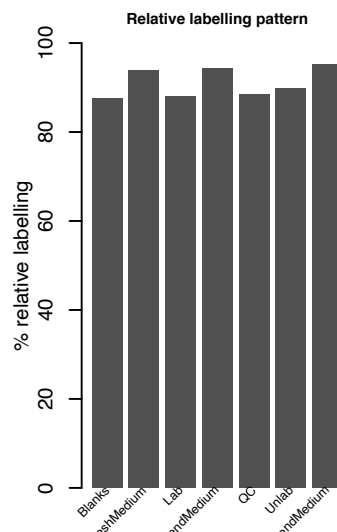

# UMP

Formula: C<sub>9</sub>H<sub>13</sub>N<sub>2</sub>O<sub>9</sub>P Mass: 324.036 Std.RT: 694.8 Ion: NEG

# G1

■UL ■+1 ■+2 ■+3 ■+4 ■+5 ■+6 ■+7 ■+8 ■+9

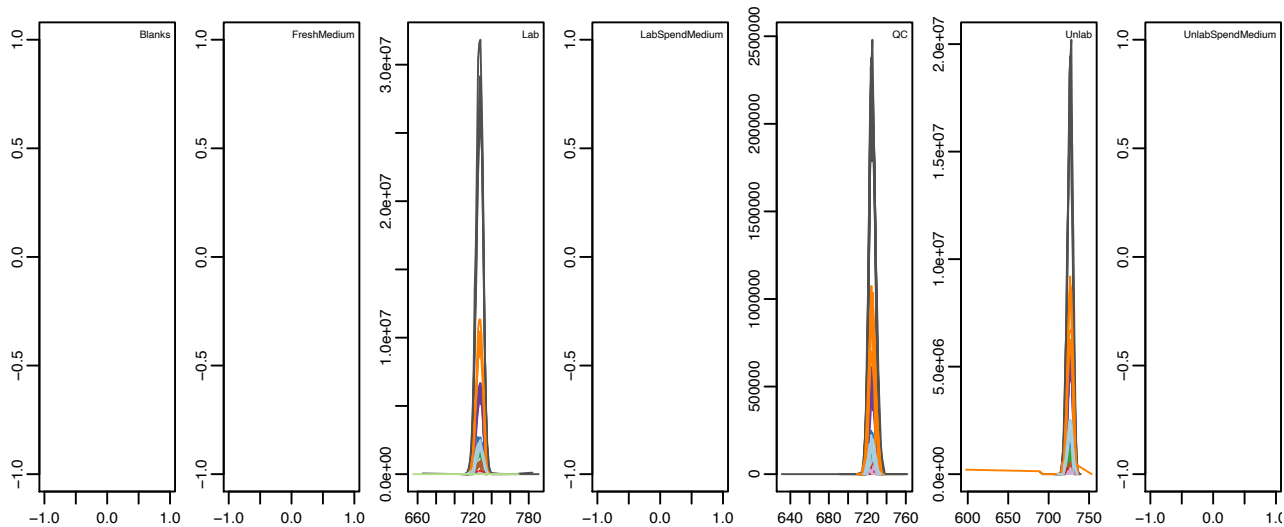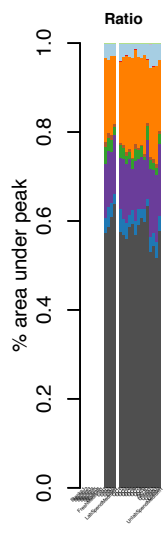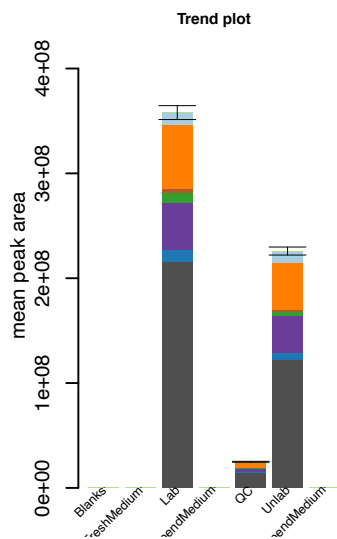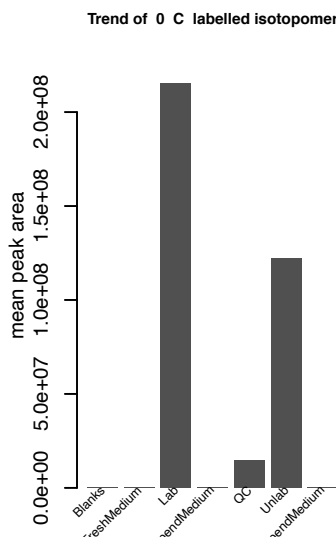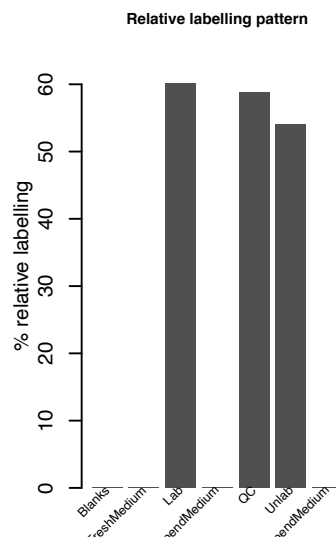

# Uracil

Formula: C<sub>4</sub>H<sub>4</sub>N<sub>2</sub>O<sub>2</sub> Mass: 112.027 Std.RT: 483.6 Ion: NEG

# G1

■ UL ■ +1 ■ +2 ■ +3 ■ +4

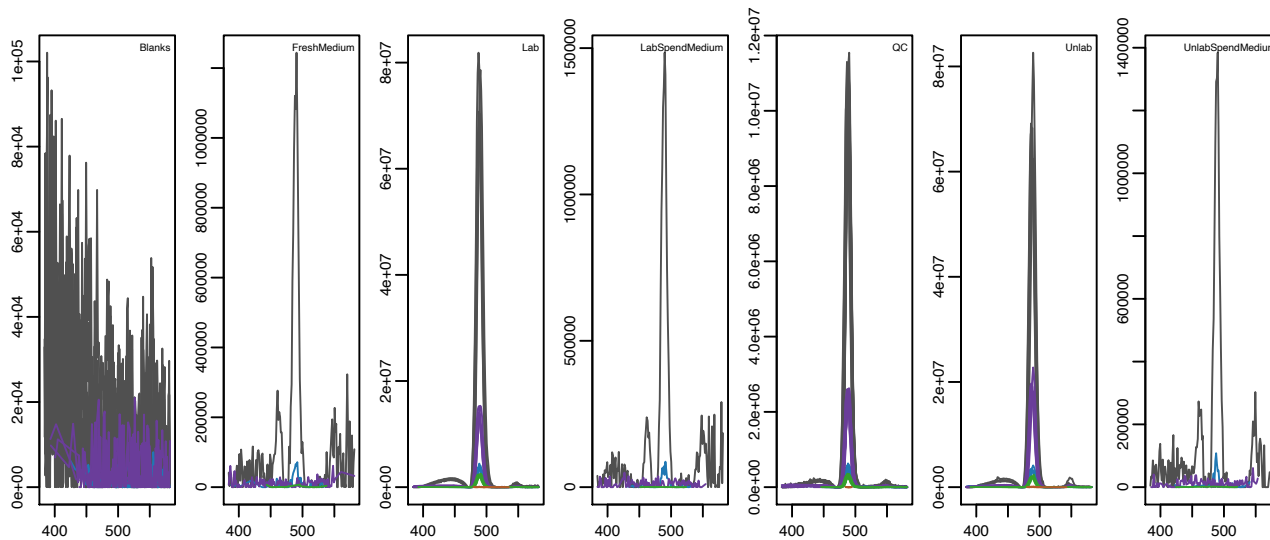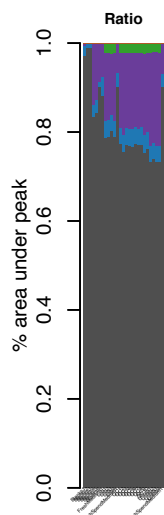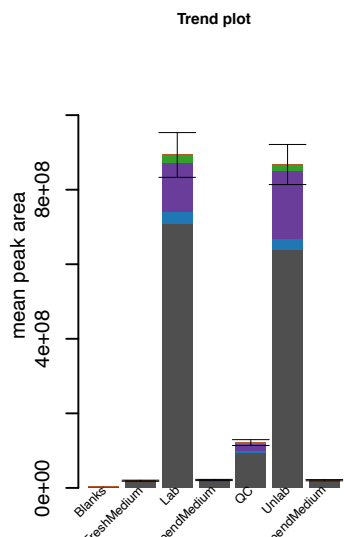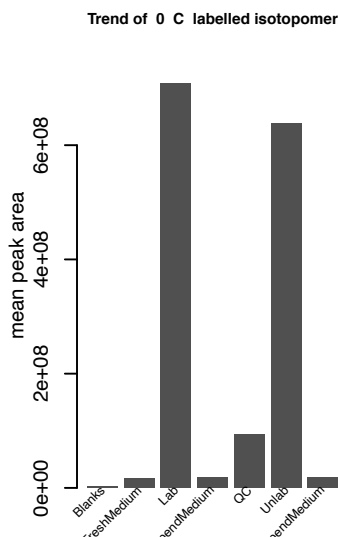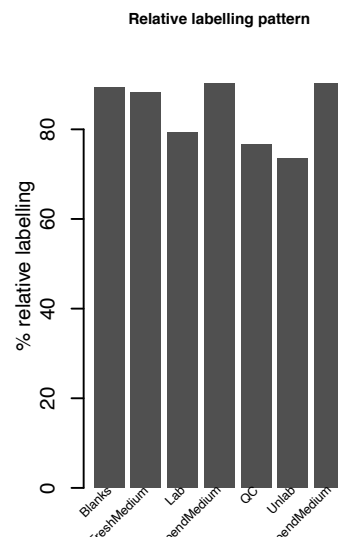

# Uridine

Formula: C<sub>9</sub>H<sub>12</sub>N<sub>2</sub>O<sub>6</sub> Mass: 244.07 Std.RT: 549 Ion: NEG

# G1

■ UL ■ +1 ■ +2 ■ +3 ■ +4 ■ +5 ■ +6 ■ +7 ■ +8 ■ +9

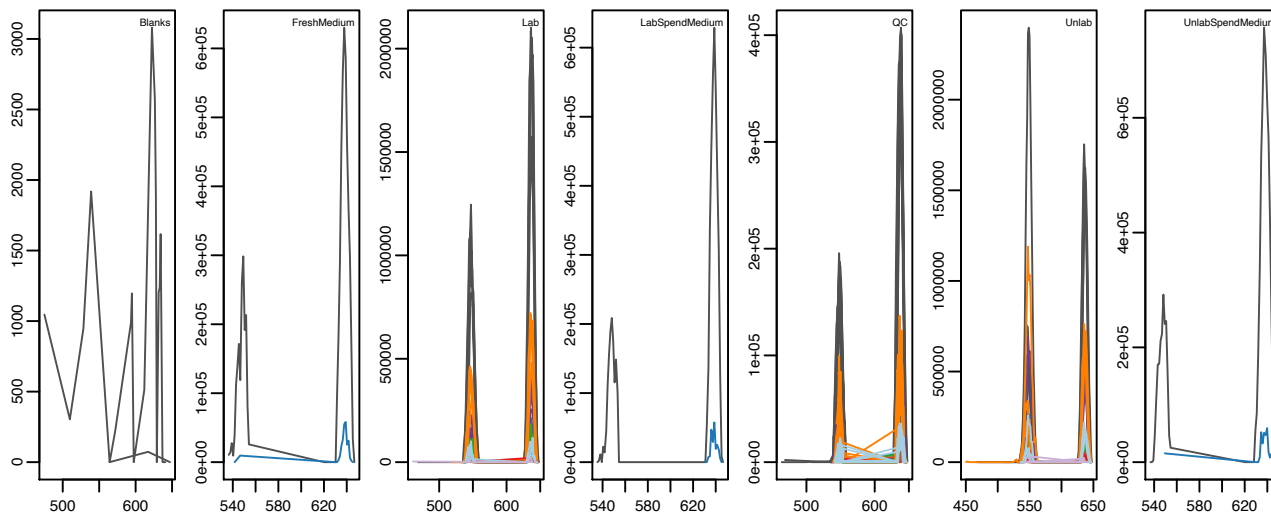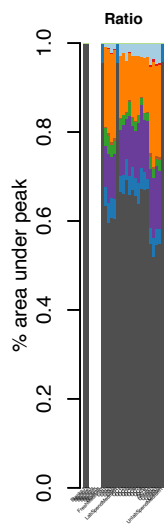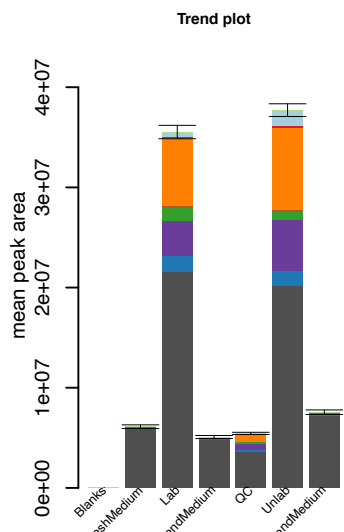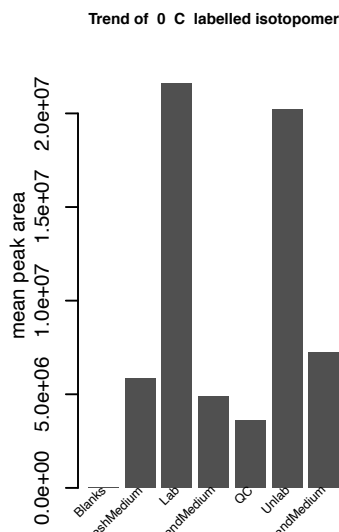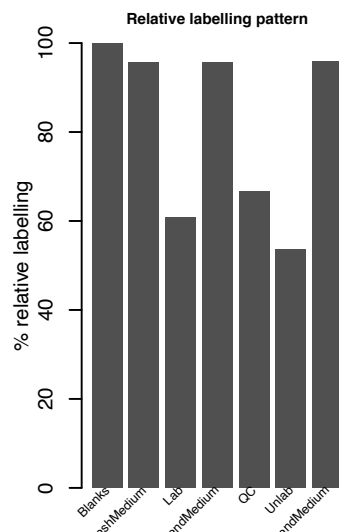

# Xanthine

Formula: C<sub>5</sub>H<sub>4</sub>N<sub>4</sub>O<sub>2</sub> Mass: 152.033 Std.RT: 630.6 Ion: NEG

# G1

■ UL ■ +1 ■ +2 ■ +3 ■ +4 ■ +5

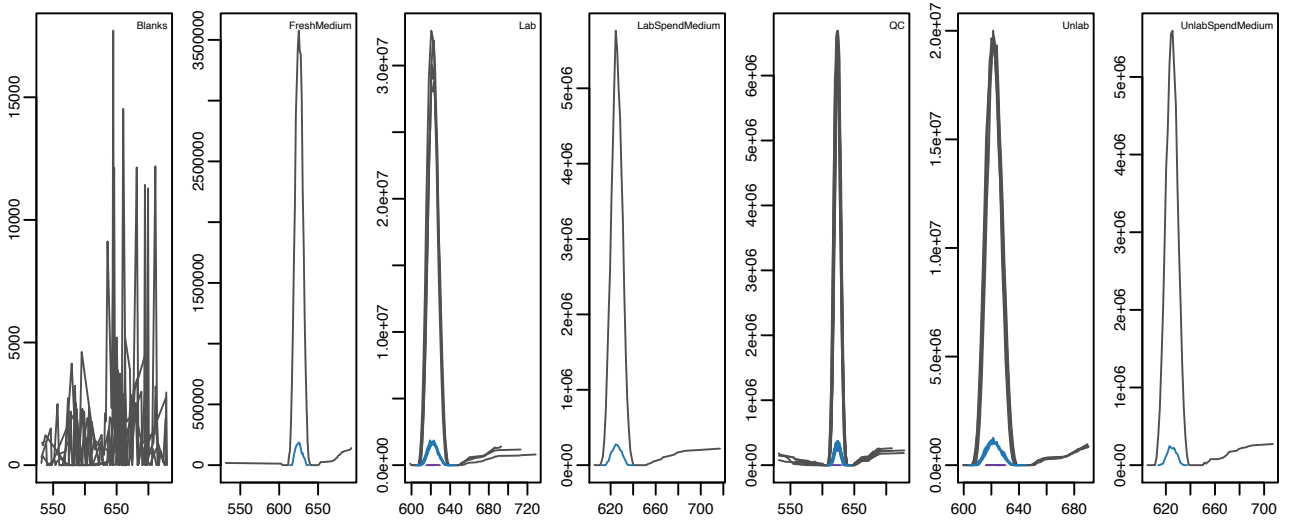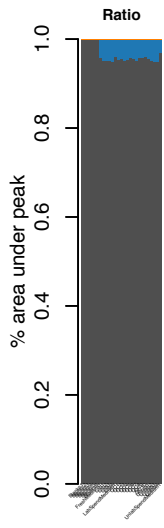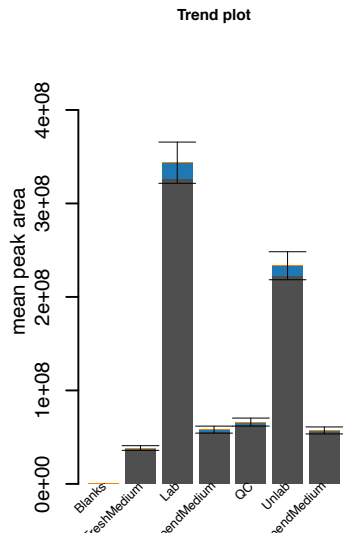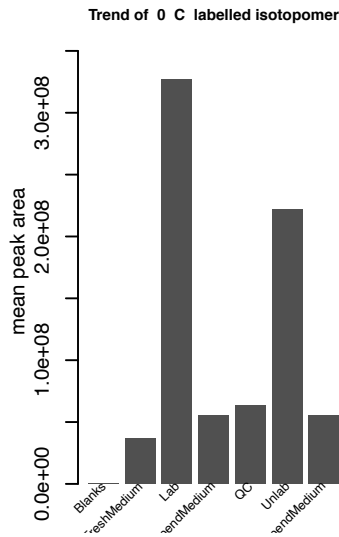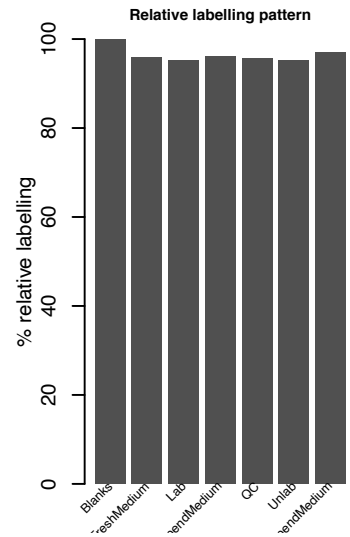



# sn-Glycerol 3-phosphate

Formula: C3H9O6P Mass: 172.014 Std.RT: 720.6 Ion: NEG

# G1

■ UL ■ +1 ■ +2 ■ +3

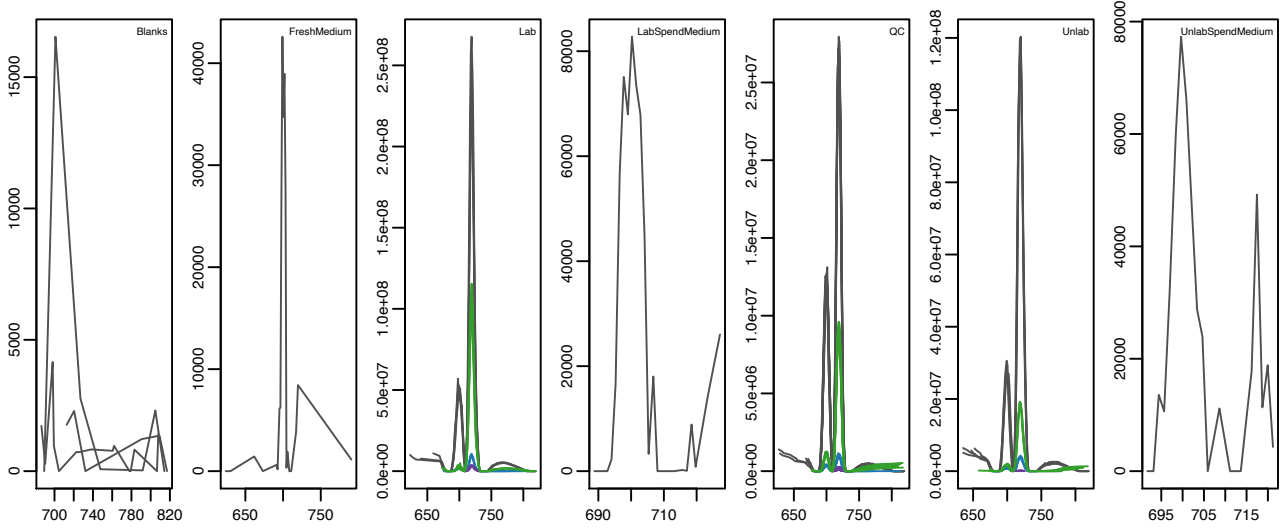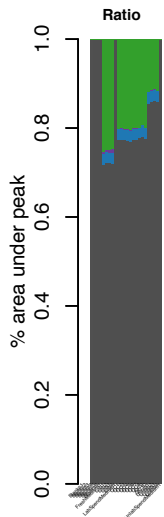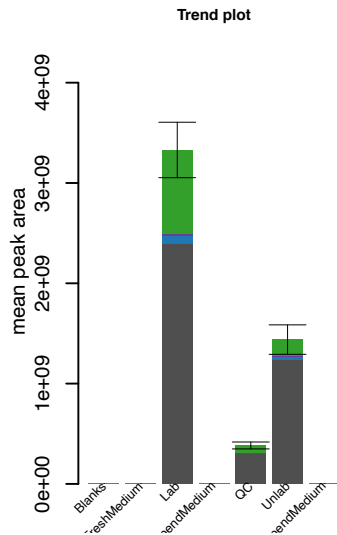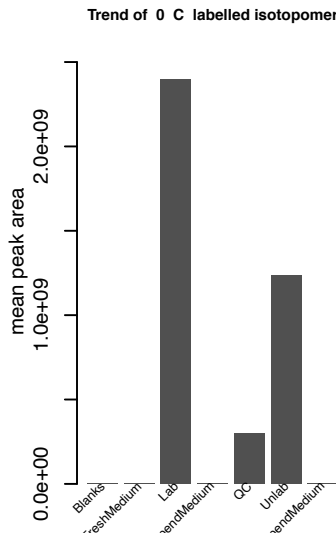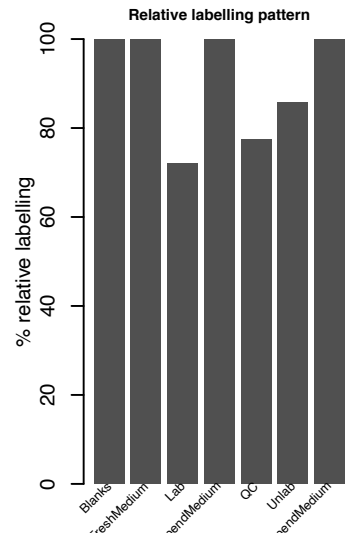

# sn-glycero-3-Phosphocholine

Formula: C<sub>8</sub>H<sub>20</sub>NO<sub>6</sub>P Mass: 257.103 Std.RT: 700.8 Ion: NEG

# G1

■ UL ■ +1 ■ +2 ■ +3 ■ +4 ■ +5 ■ +6 ■ +7 ■ +8

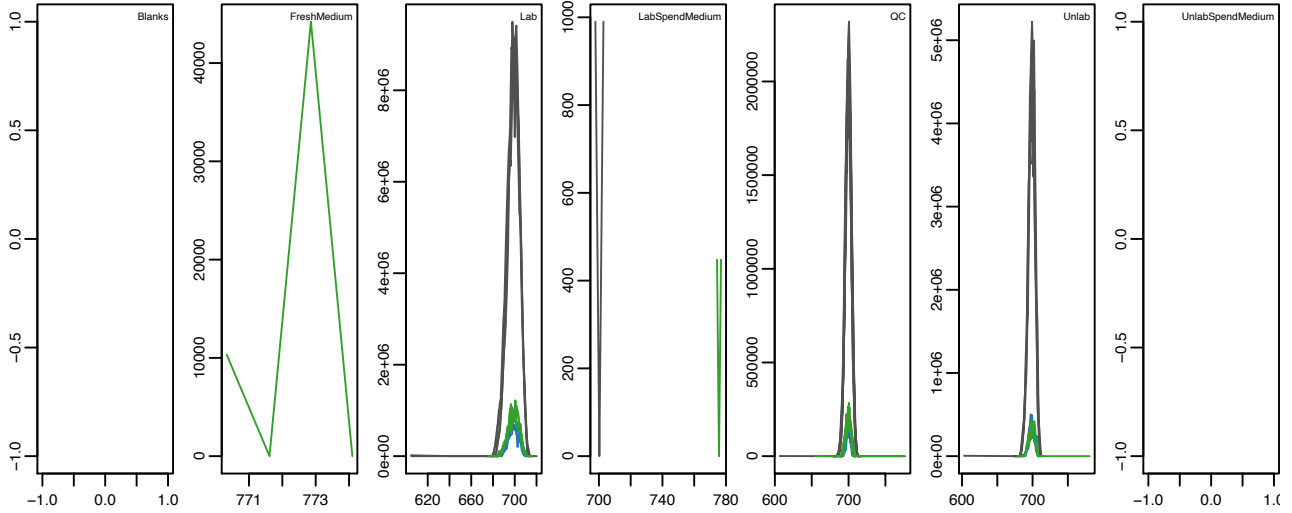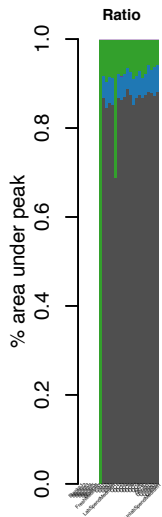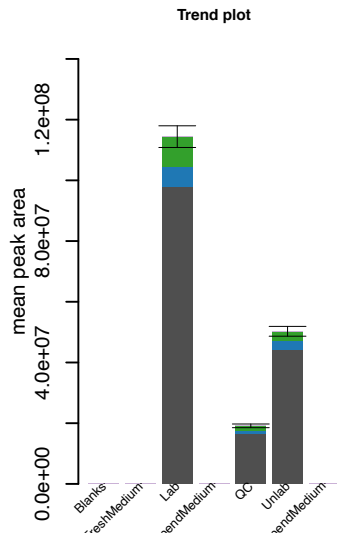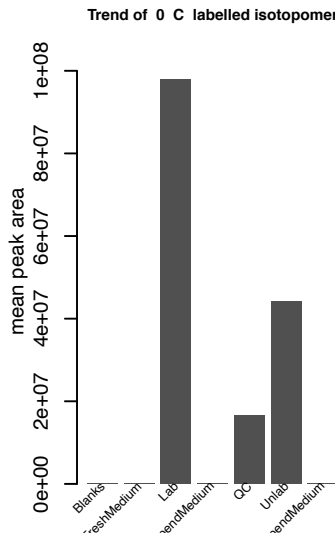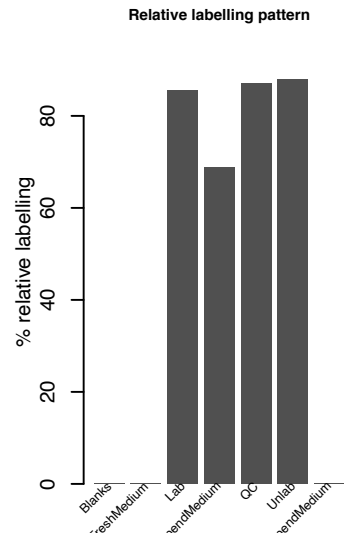

# thymine

Formula: C<sub>5</sub>H<sub>6</sub>N<sub>2</sub>O<sub>2</sub> Mass: 126.043 Std.RT: 418.2 Ion: NEG

# G1

■ UL ■ +1 ■ +2 ■ +3 ■ +4 ■ +5

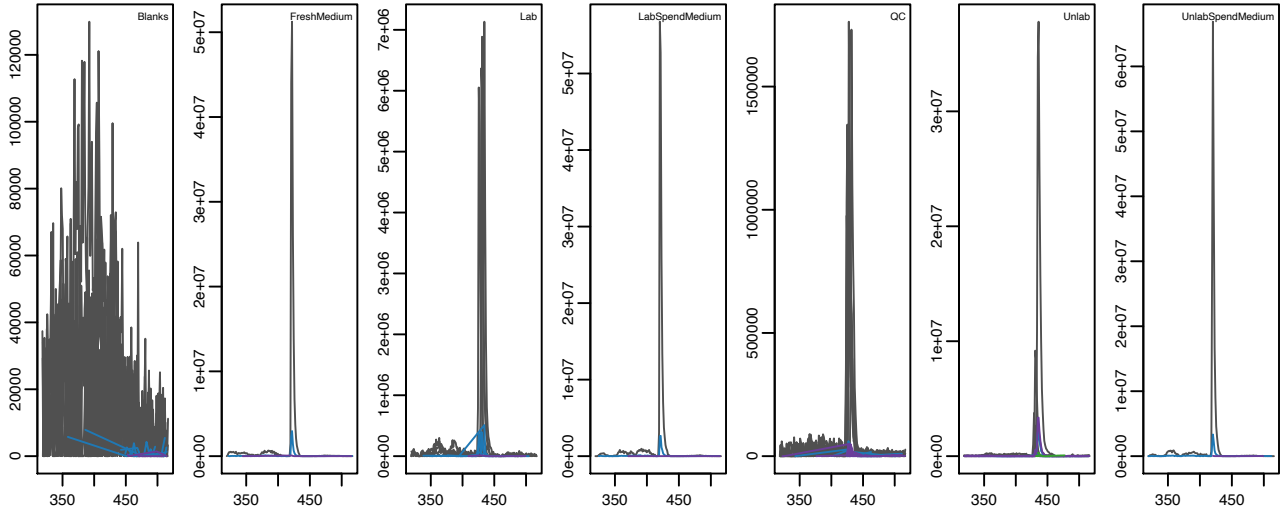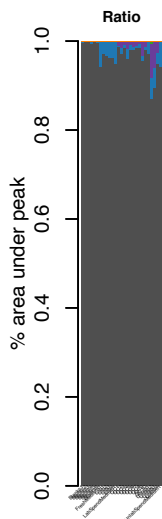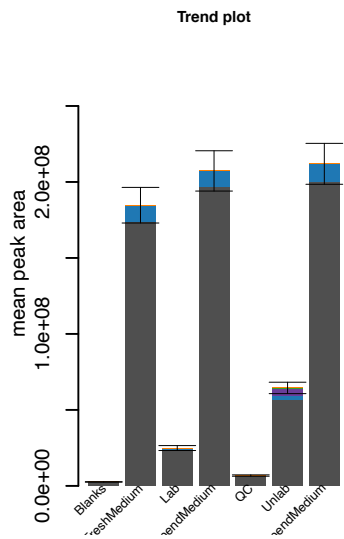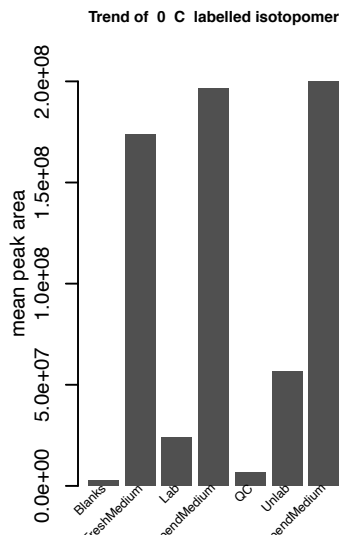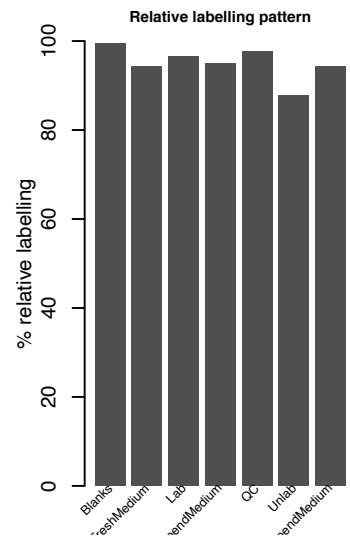

# 3'\_5'-Cyclic AMP

Formula: C<sub>10</sub>H<sub>12</sub>N<sub>5</sub>O<sub>6</sub>P Mass: 329.053 Std.RT: 526.8 Ion: POS

# G1

■UL ■+1 ■+2 ■+3 ■+4 ■+5 ■+6 ■+7 ■+8 ■+9 ■+10

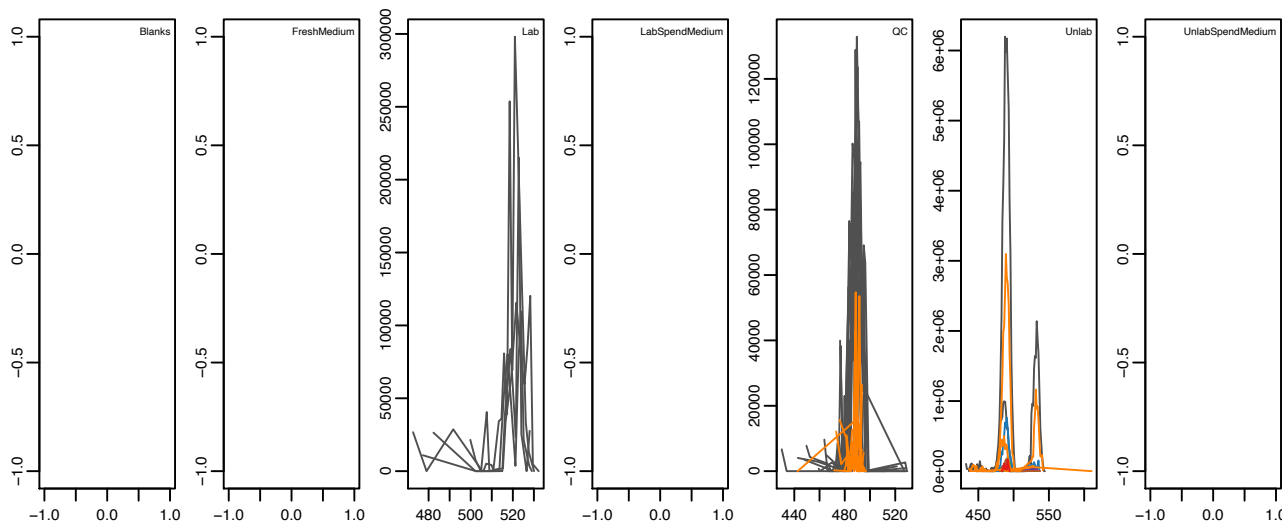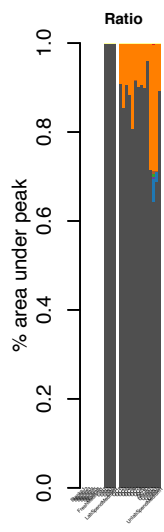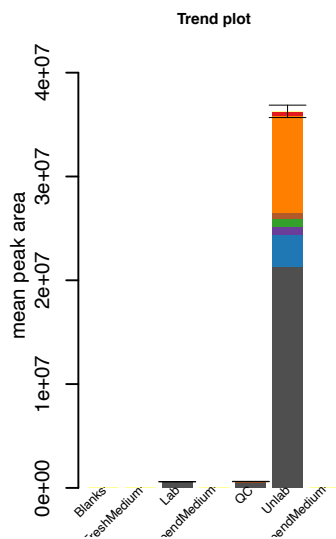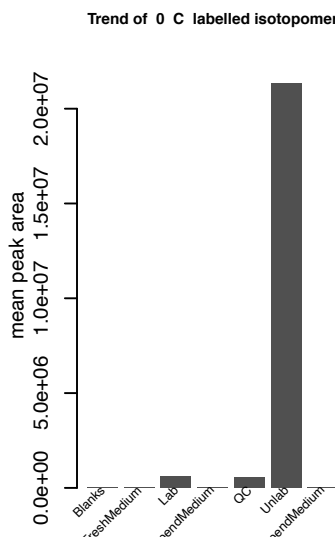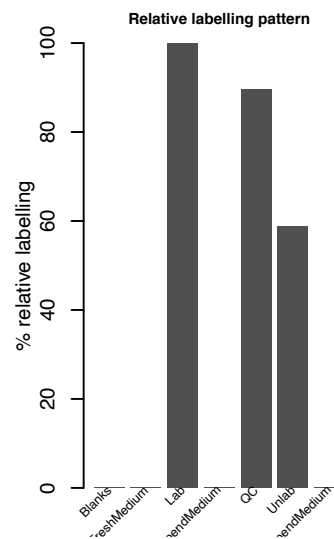

# 5'-Methylthioadenosine

Formula: C<sub>11</sub>H<sub>15</sub>N<sub>5</sub>O<sub>3</sub>S Mass: 297.09 Std.RT: 363 Ion: POS

# G1

■UL ■+1 ■+2 ■+3 ■+4 ■+5 ■+6 ■+7 ■+8 ■+9 ■+10 ■+11

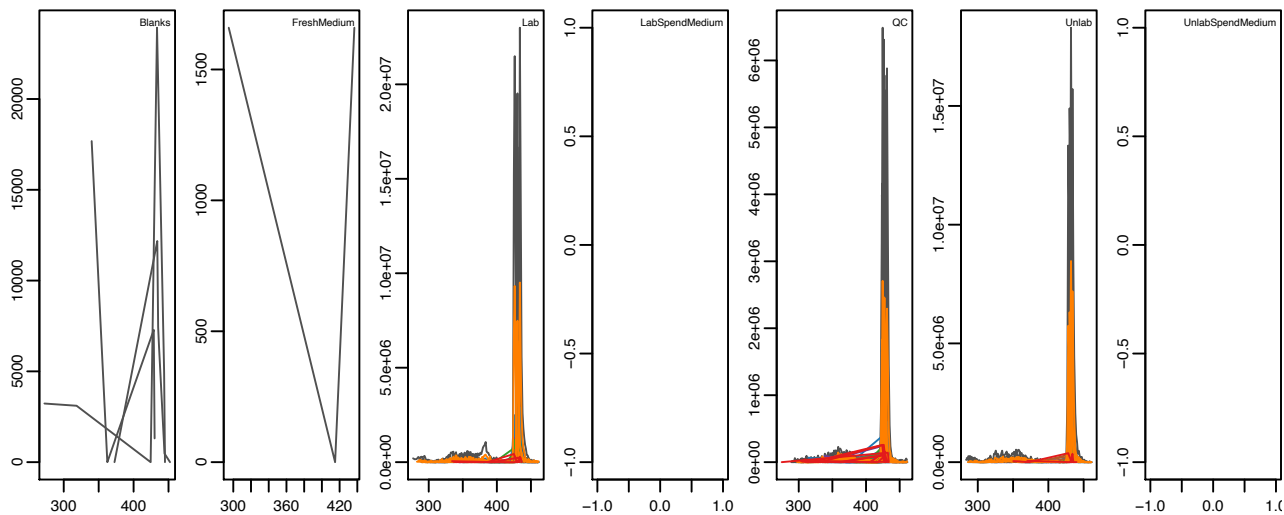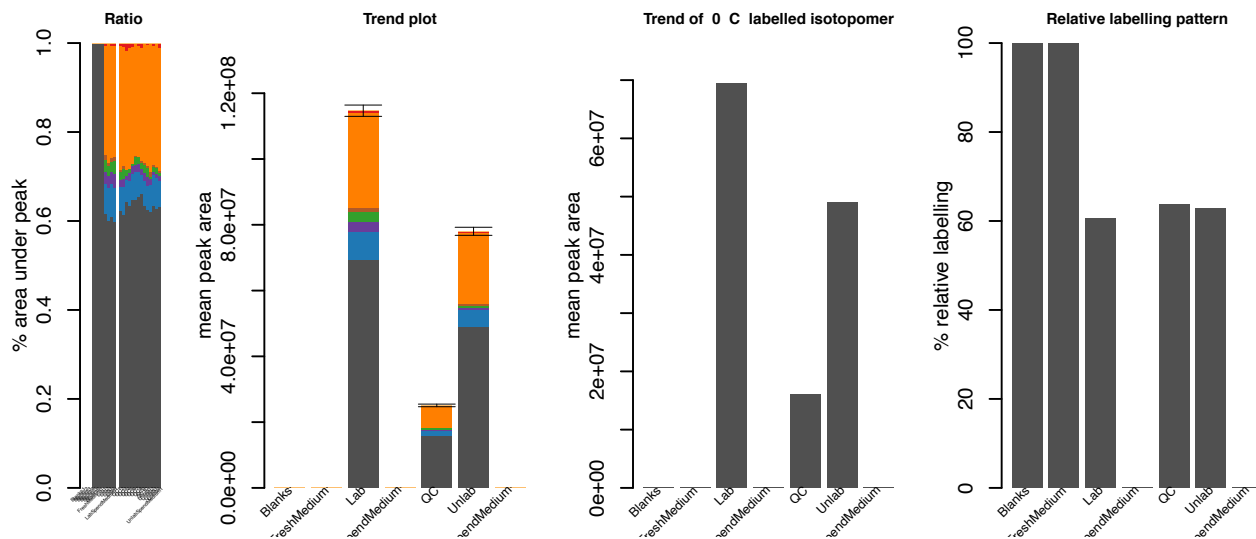

# ADP

Formula: C<sub>10</sub>H<sub>15</sub>N<sub>5</sub>O<sub>10</sub>P<sub>2</sub> Mass: 427.029 Std.RT: 714 Ion: POS

# G1

■UL ■+1 ■+2 ■+3 ■+4 ■+5 ■+6 ■+7 ■+8 ■+9 ■+10

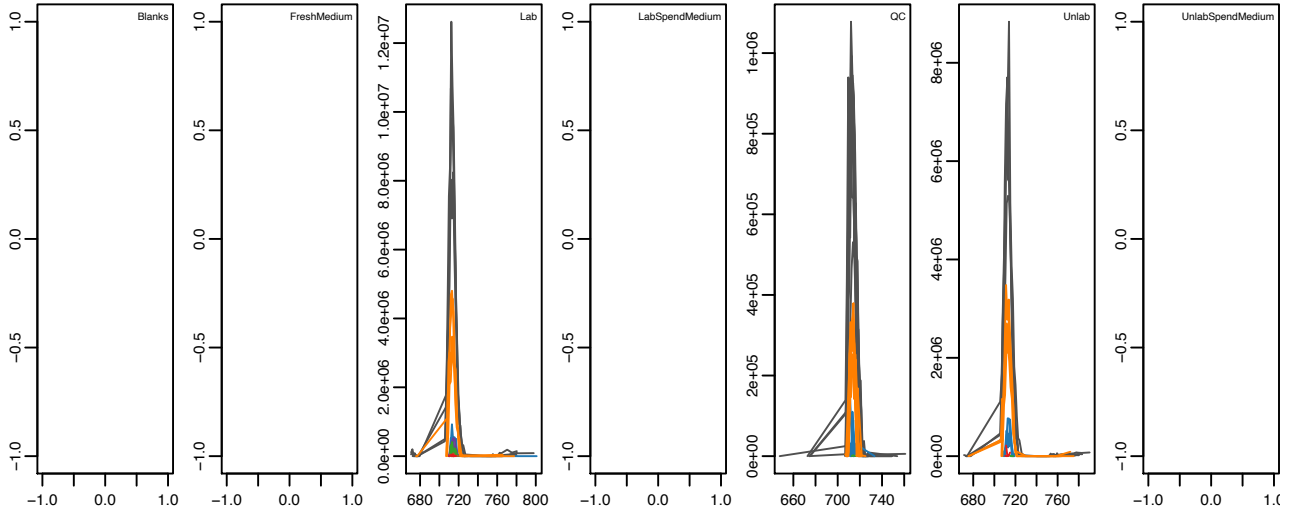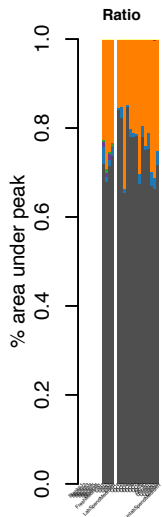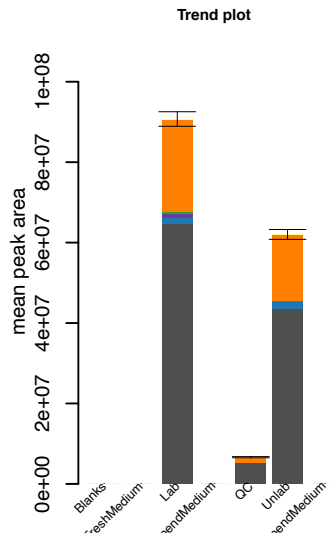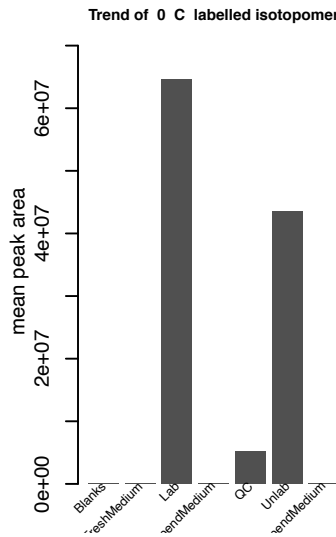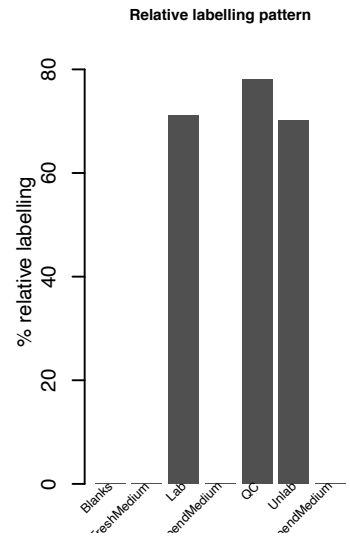

# AMP

Formula: C<sub>10</sub>H<sub>14</sub>N<sub>5</sub>O<sub>7</sub>P Mass: 347.063 Std.RT: 670.8 Ion: POS

# G1

■ UL ■ +1 ■ +2 ■ +3 ■ +4 ■ +5 ■ +6 ■ +7 ■ +8 ■ +9 ■ +10

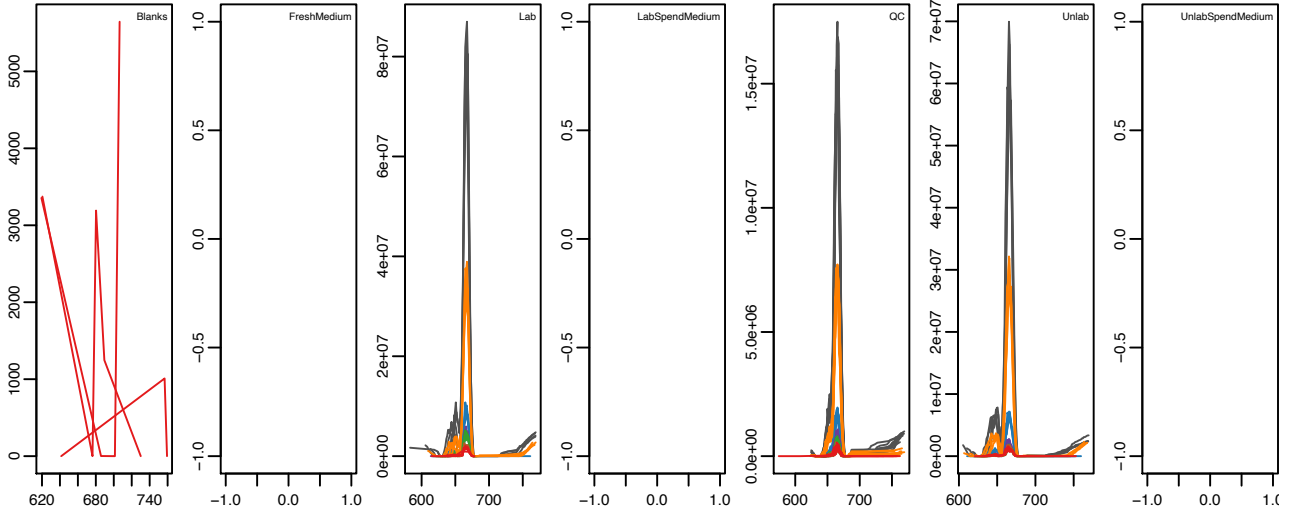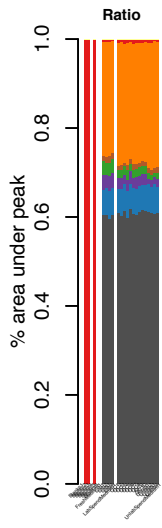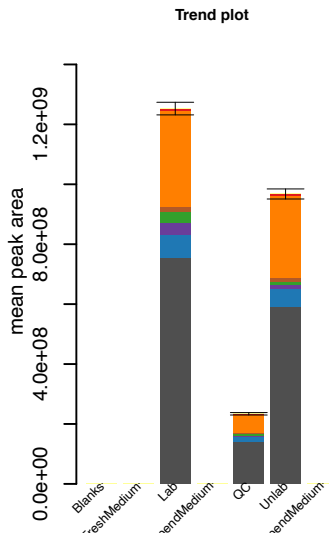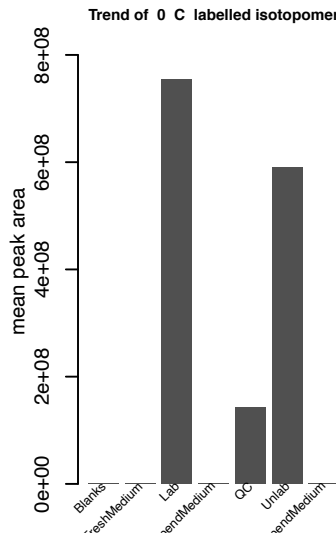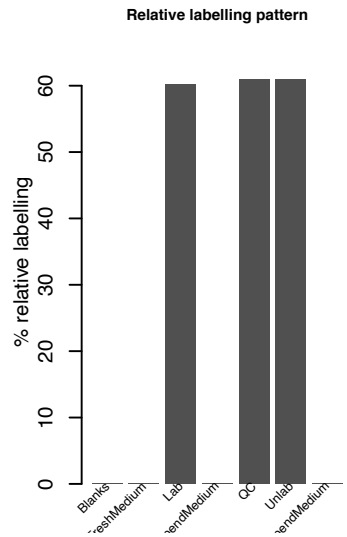

# Acetylcholine

Formula: C<sub>7</sub>H<sub>15</sub>NO<sub>2</sub> Mass: 145.11 Std.RT: 823.2 Ion: POS

# G1

■ UL ■ +1 ■ +2 ■ +3 ■ +4 ■ +5 ■ +6 ■ +7

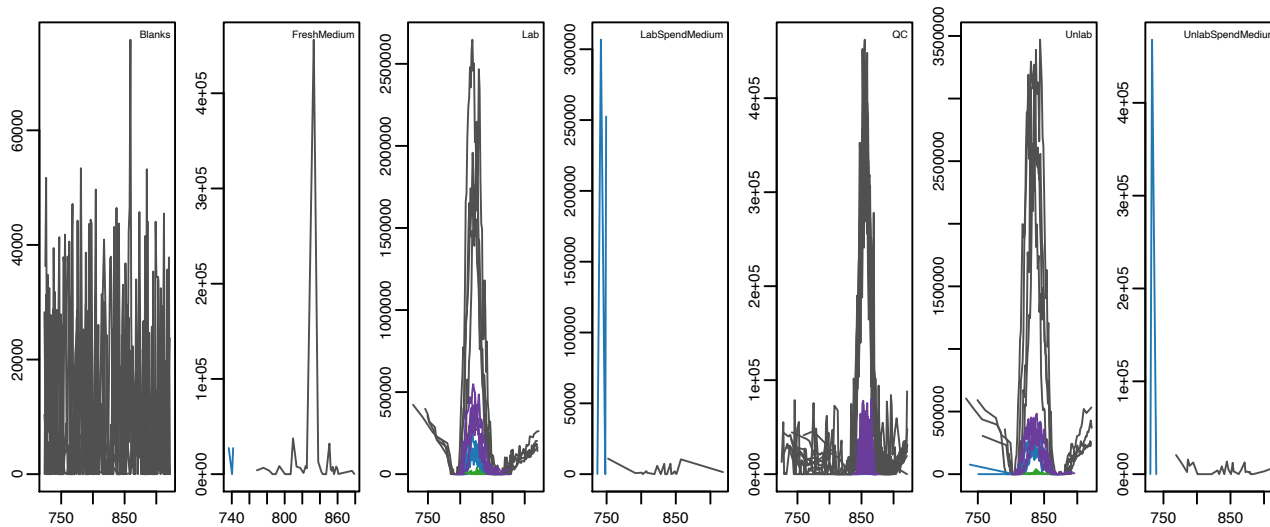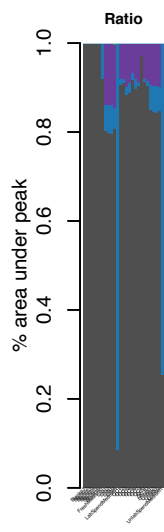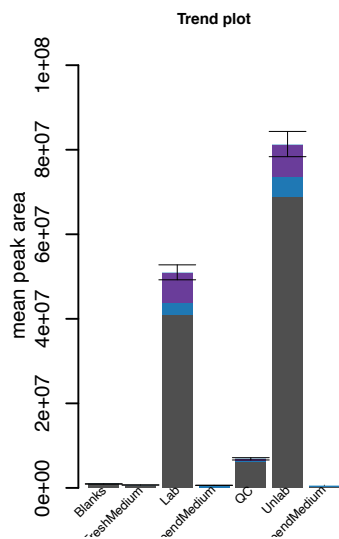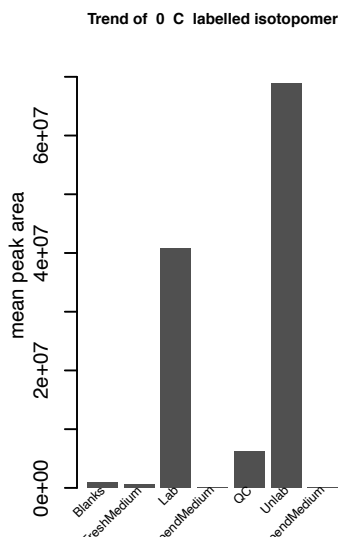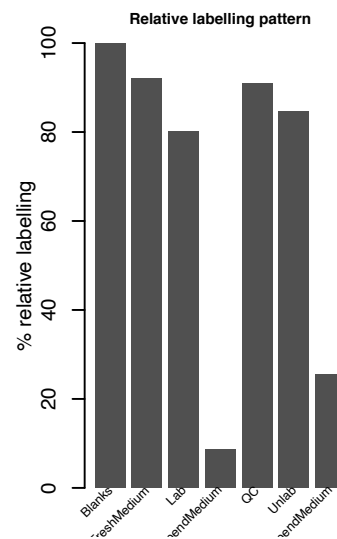



# Adenine

Formula: C<sub>5</sub>H<sub>5</sub>N<sub>5</sub> Mass: 135.054 Std.RT: 523.8 Ion: POS

# G1

■ UL ■ +1 ■ +2 ■ +3 ■ +4 ■ +5

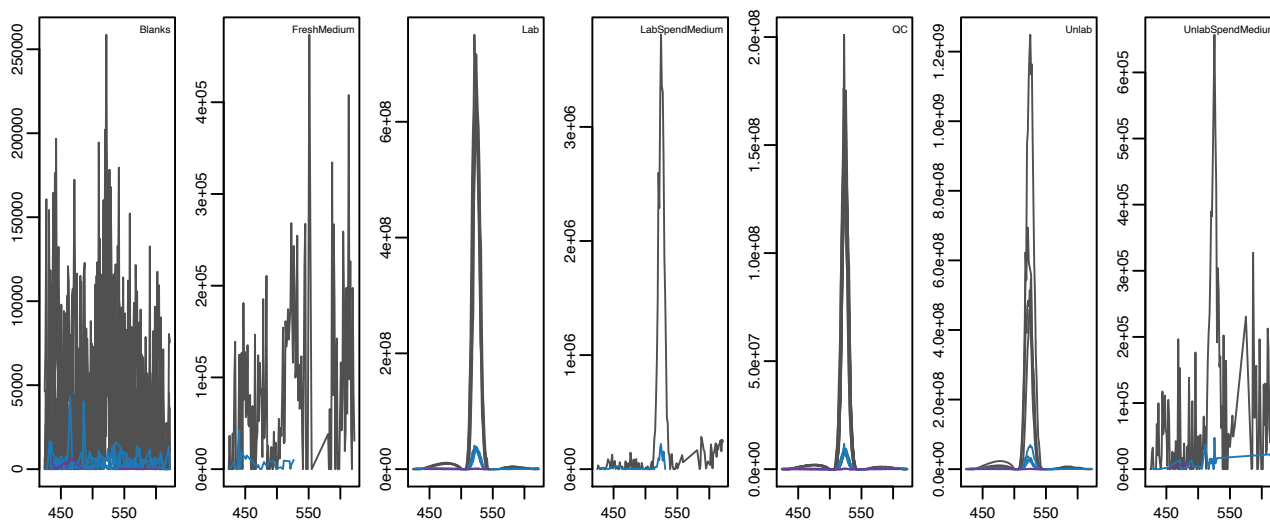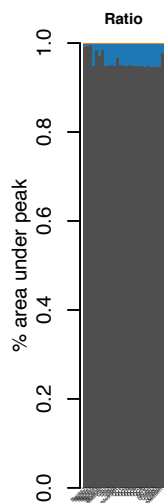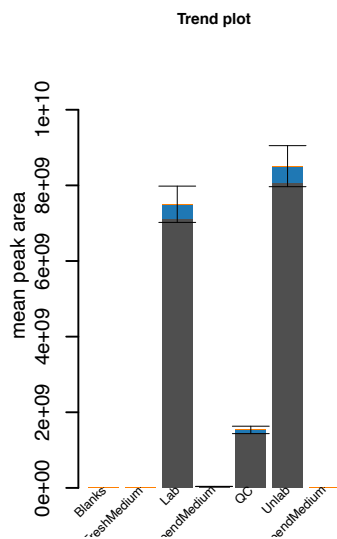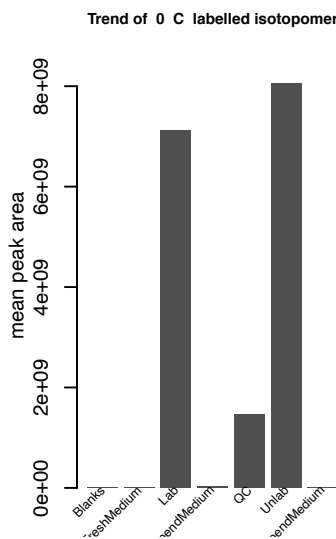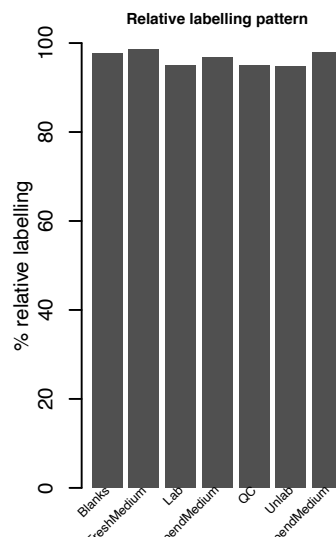

# Adenosine

Formula: C<sub>10</sub>H<sub>13</sub>N<sub>5</sub>O<sub>4</sub> Mass: 267.097 Std.RT: 494.4 Ion: POS

# G1

■UL ■+1 ■+2 ■+3 ■+4 ■+5 ■+6 ■+7 ■+8 ■+9 ■+10

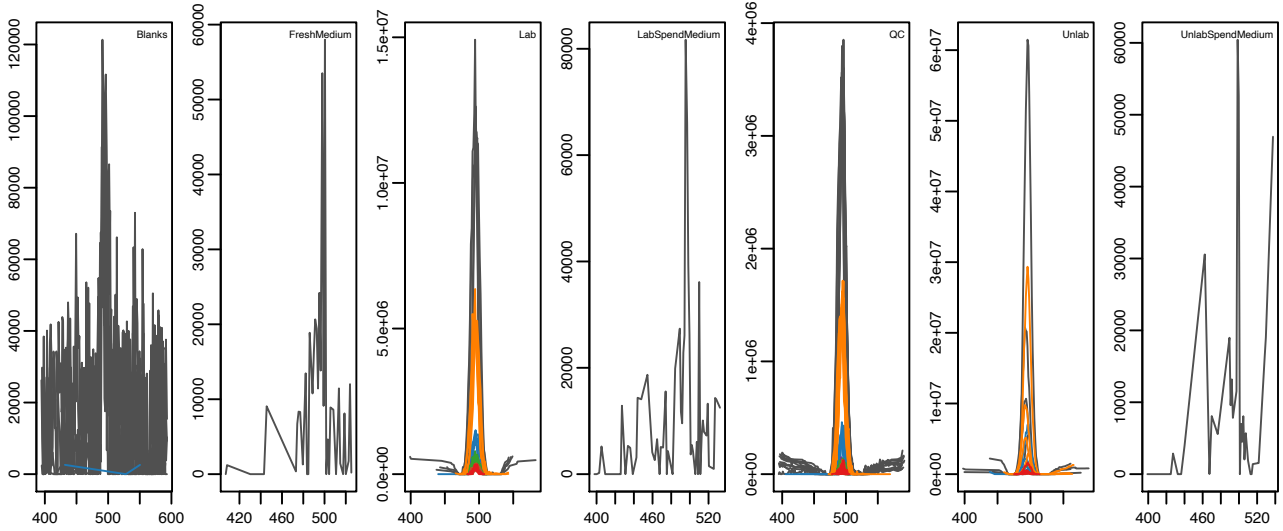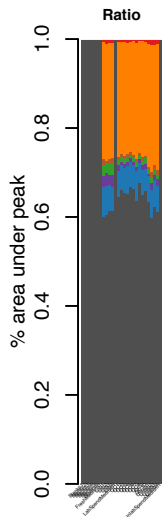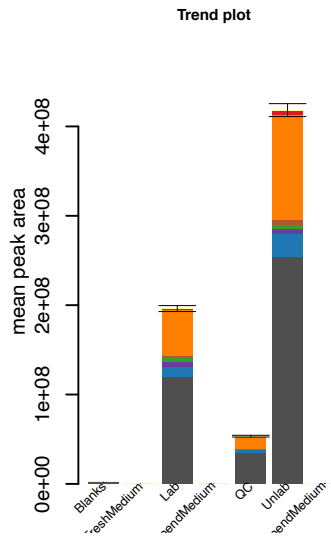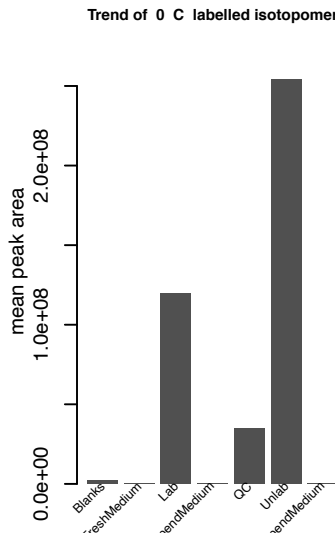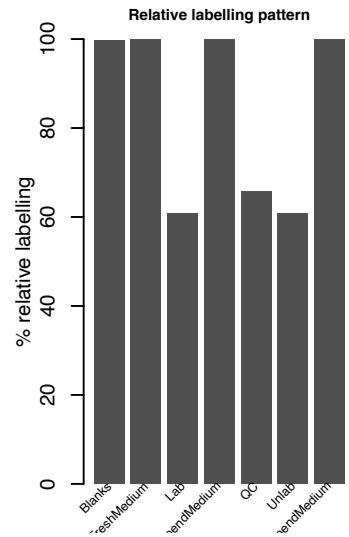

# Adenosine 2'\_5'-bisphosphate

Formula: C<sub>10</sub>H<sub>15</sub>N<sub>5</sub>O<sub>10</sub>P<sub>2</sub> Mass: 427.029 Std.RT: 761.4 Ion: POS

G1

■UL ■+1 ■+2 ■+3 ■+4 ■+5 ■+6 ■+7 ■+8 ■+9 ■+10

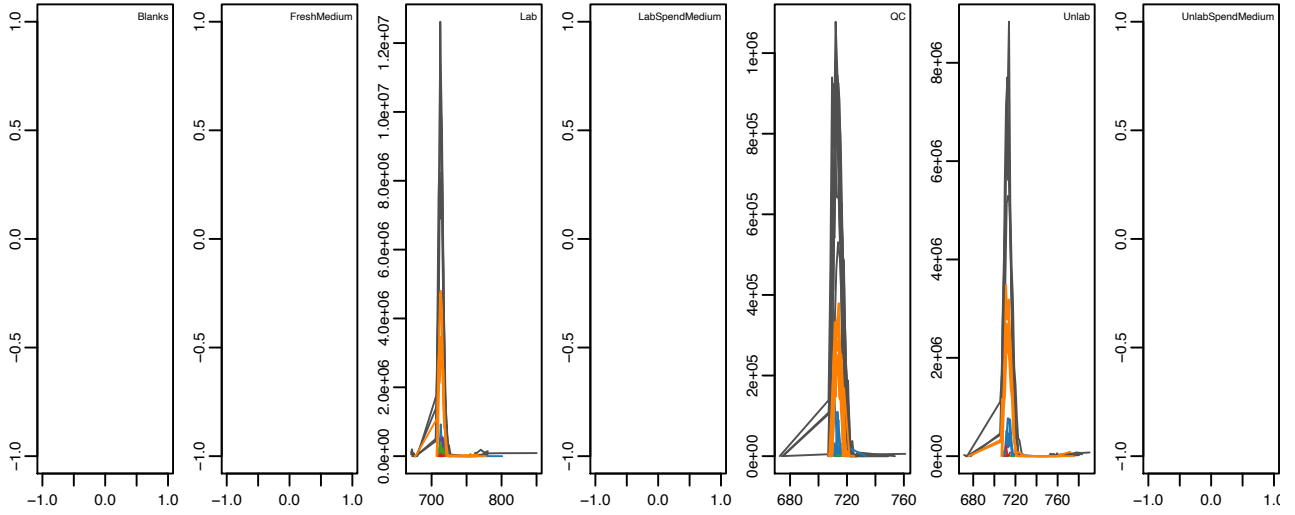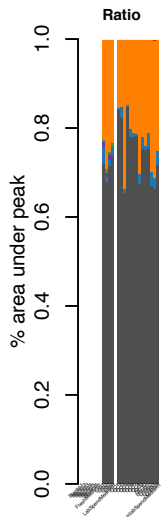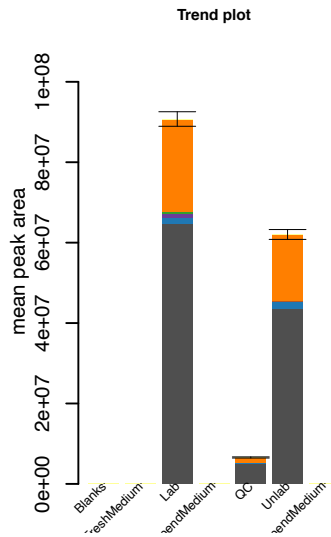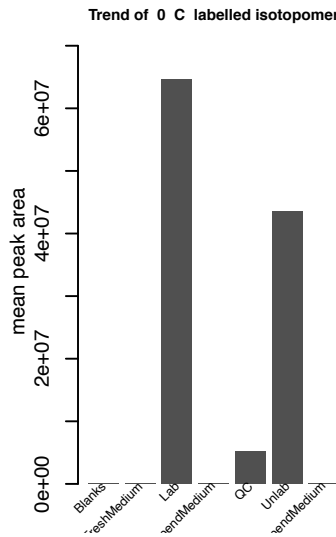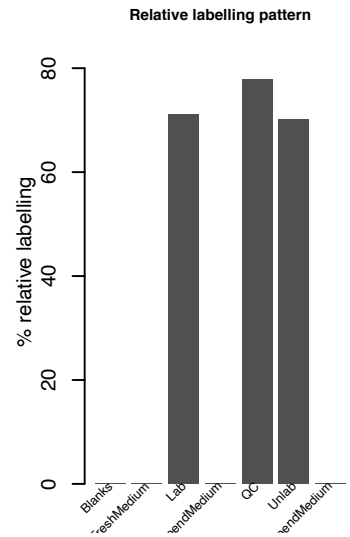

# Choline

Formula: C<sub>5</sub>H<sub>13</sub>NO Mass: 103.1 Std.RT: 1069.8 Ion: POS

# G1

■ UL ■ +1 ■ +2 ■ +3 ■ +4 ■ +5

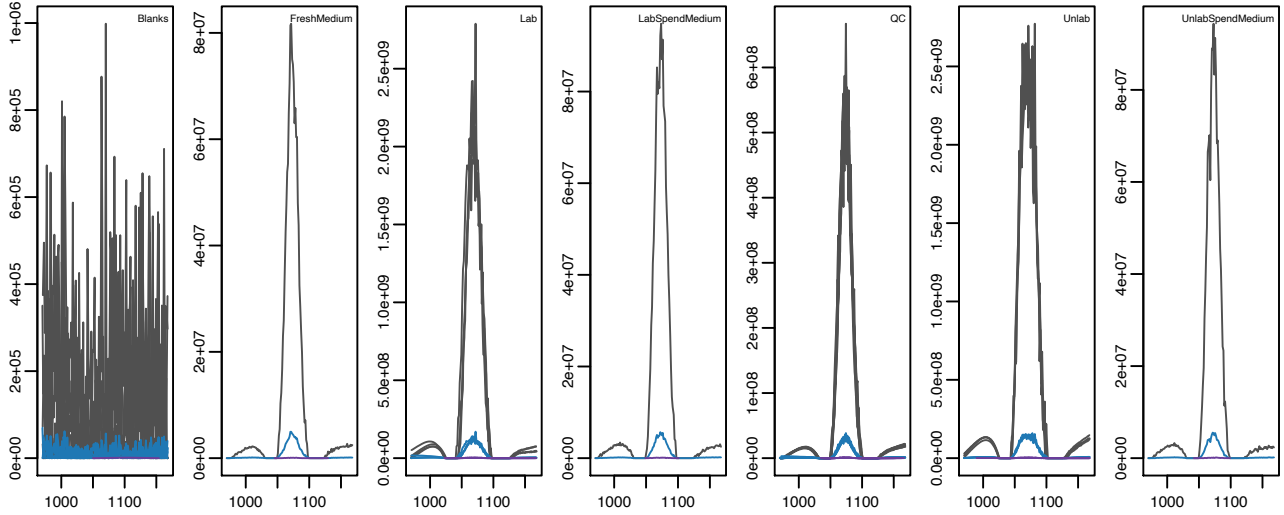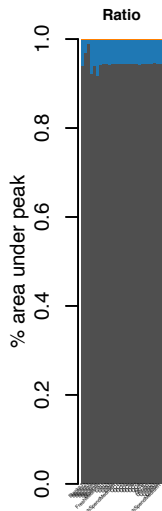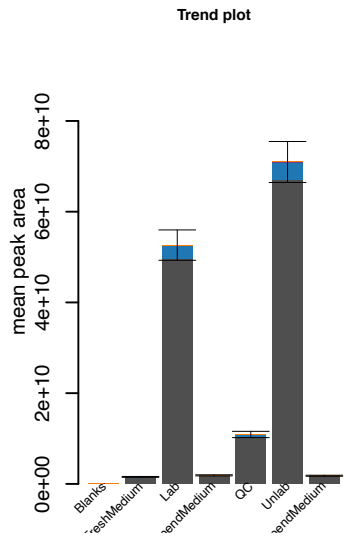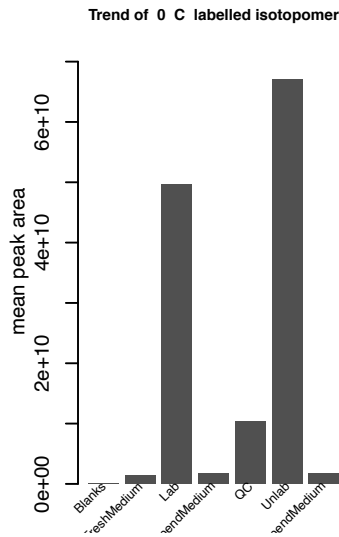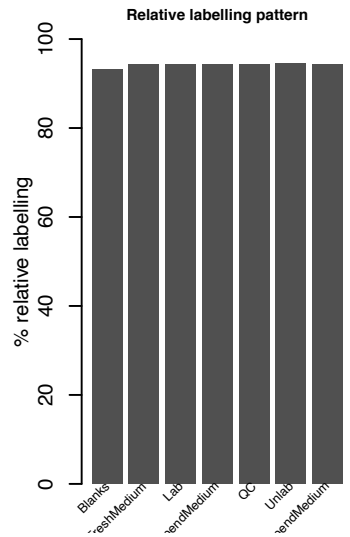

# Choline phosphate

Formula: C<sub>5</sub>H<sub>14</sub>NO<sub>4</sub>P Mass: 183.066 Std.RT: 706.2 Ion: POS

# G1

■ UL ■ +1 ■ +2 ■ +3 ■ +4 ■ +5

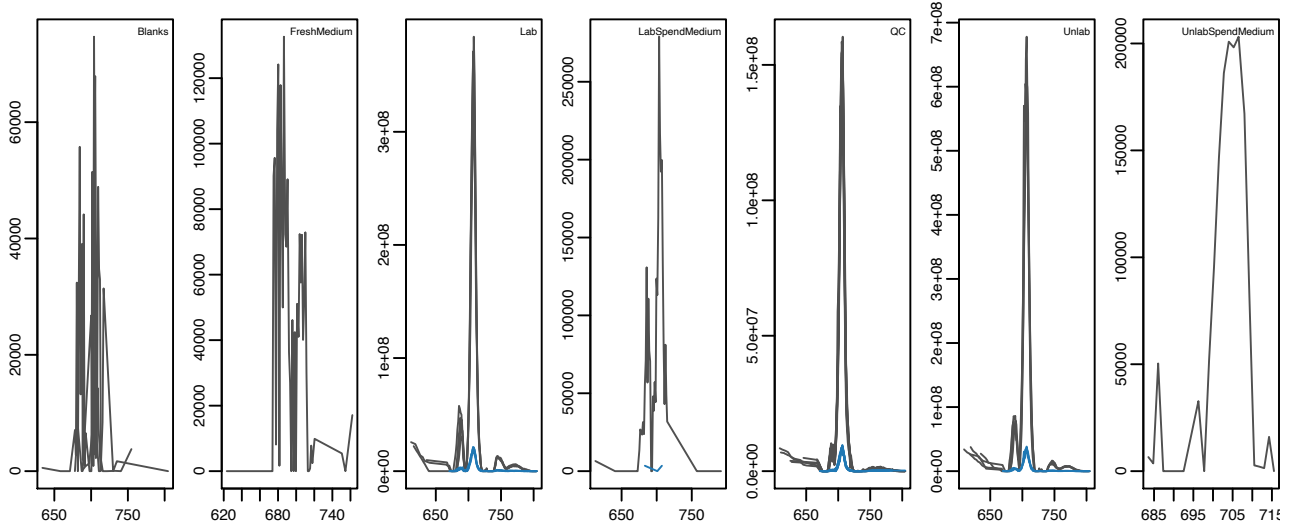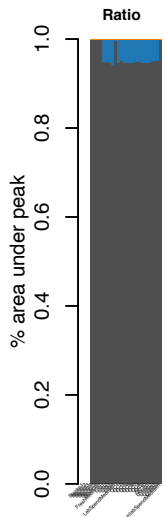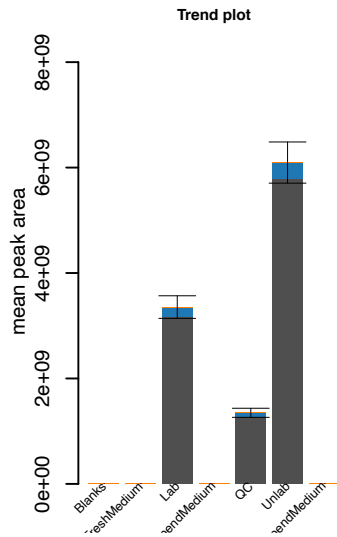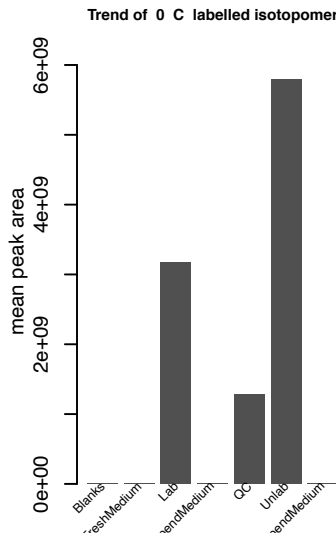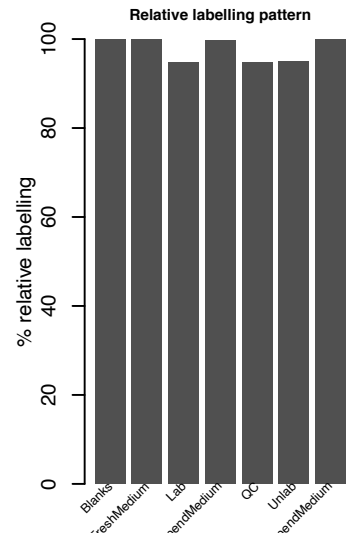

# Cytidine

Formula: C<sub>9</sub>H<sub>13</sub>N<sub>3</sub>O<sub>5</sub> Mass: 243.086 Std.RT: 633.6 Ion: POS

# G1

■ UL ■ +1 ■ +2 ■ +3 ■ +4 ■ +5 ■ +6 ■ +7 ■ +8 ■ +9

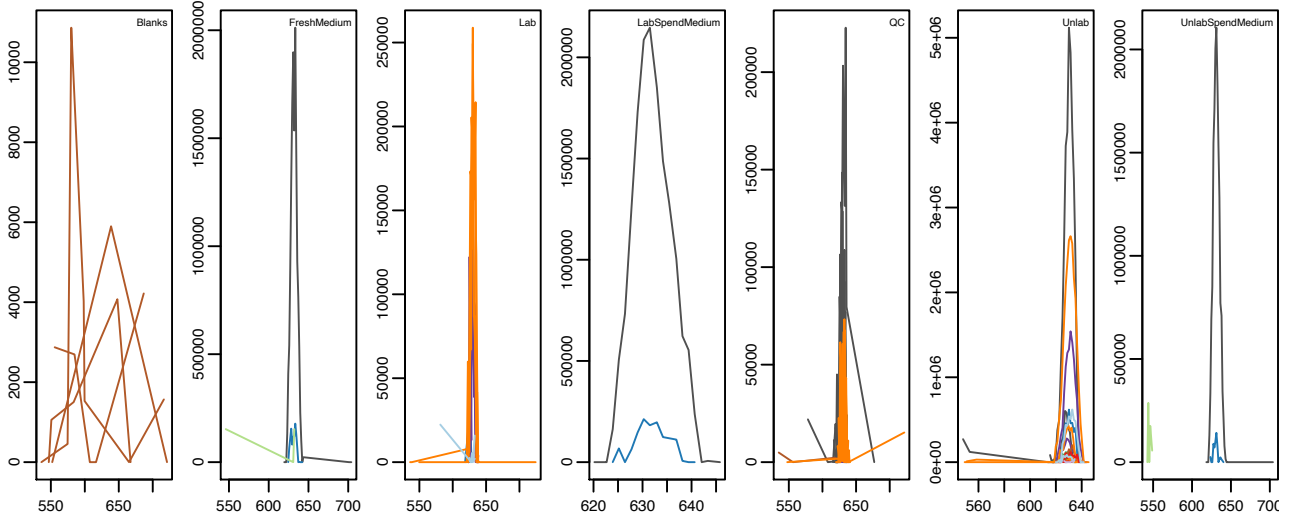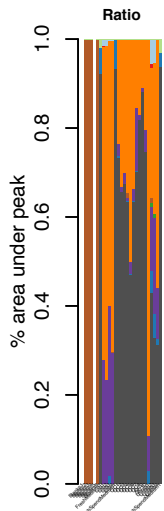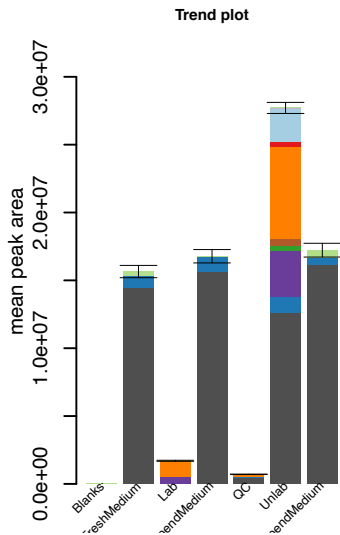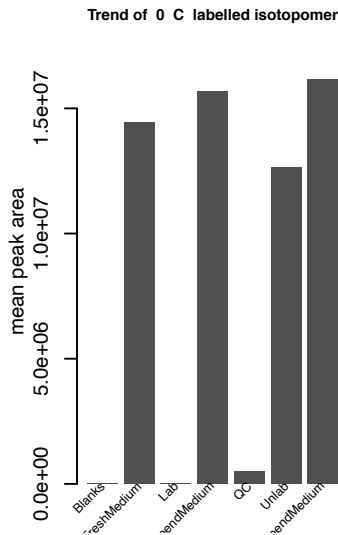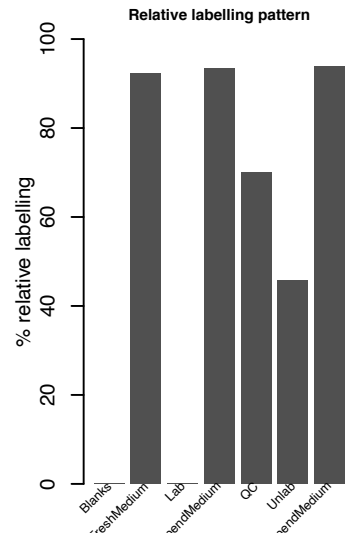

# D-Glucosamine-6-phosphate

Formula: C<sub>6</sub>H<sub>14</sub>NO<sub>8</sub>P Mass: 259.046 Std.RT: 759 Ion: POS

# G1

■ UL ■ +1 ■ +2 ■ +3 ■ +4 ■ +5 ■ +6

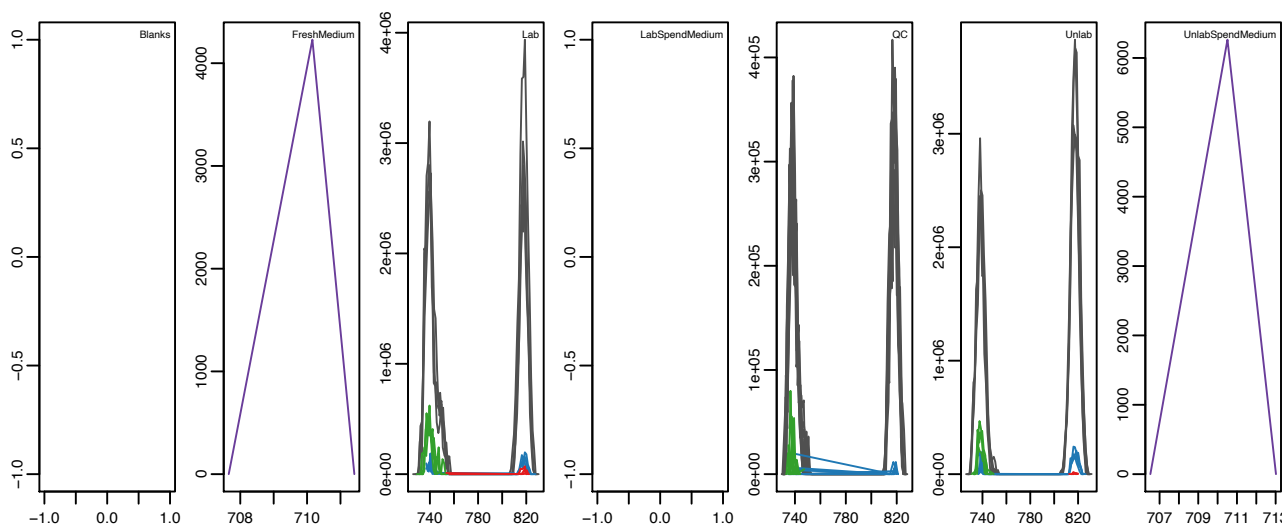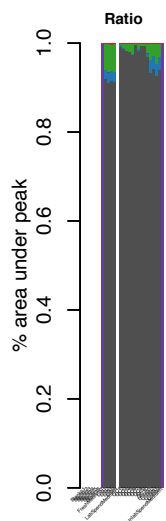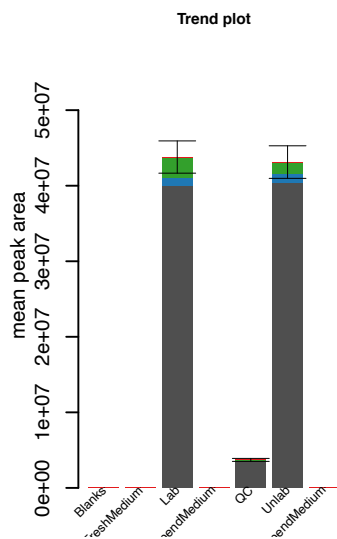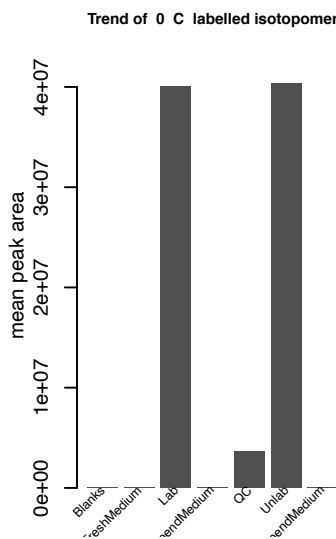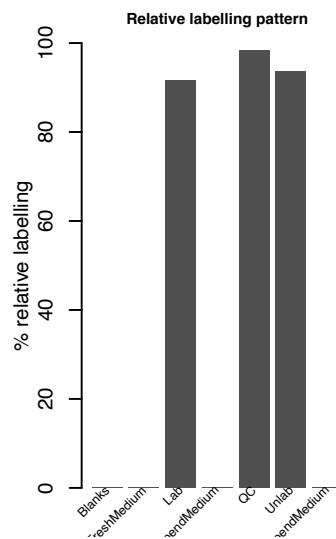

# GDP

Formula: C<sub>10</sub>H<sub>15</sub>N<sub>5</sub>O<sub>11</sub>P<sub>2</sub> Mass: 443.024 Std.RT: 816 Ion: POS

# G1

■UL ■+1 ■+2 ■+3 ■+4 ■+5 ■+6 ■+7 ■+8 ■+9 ■+10

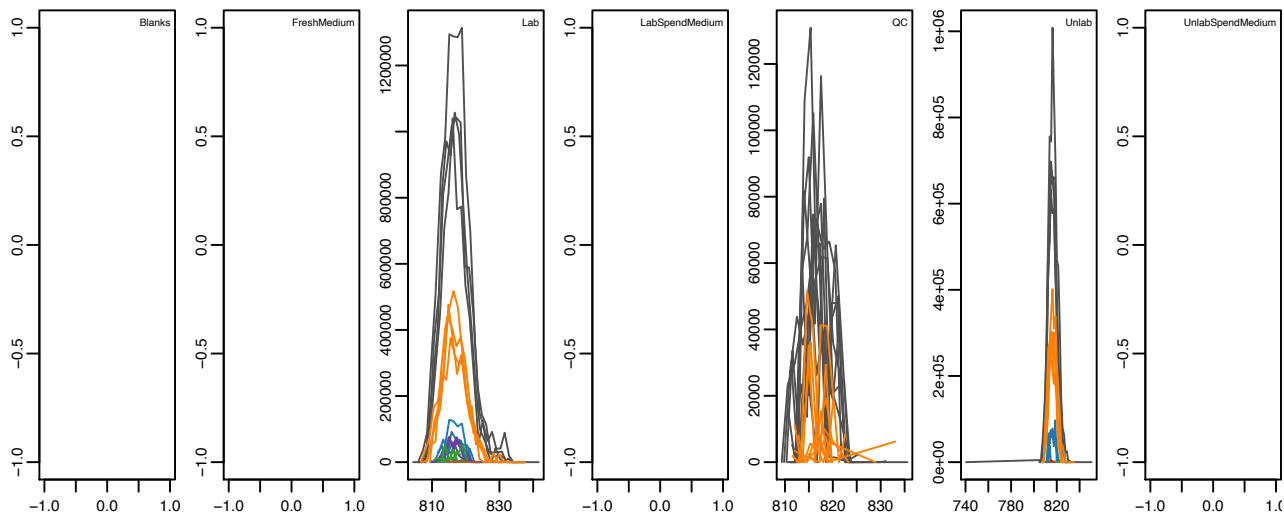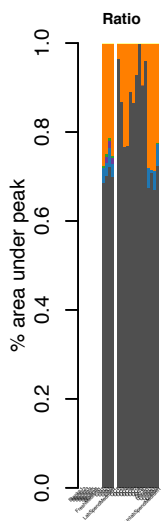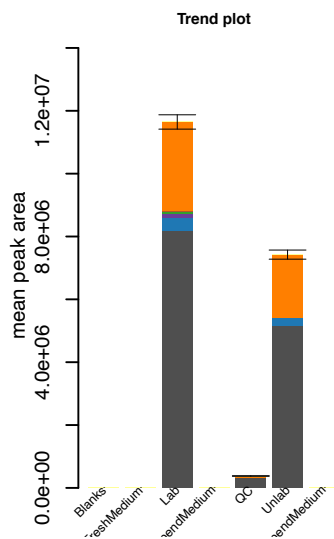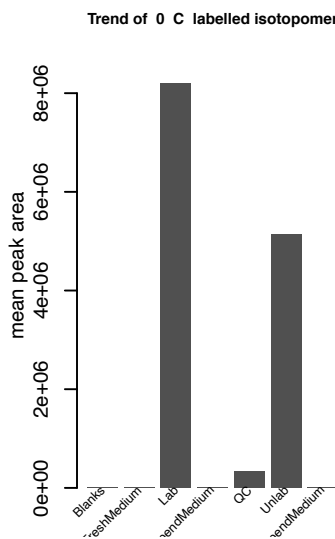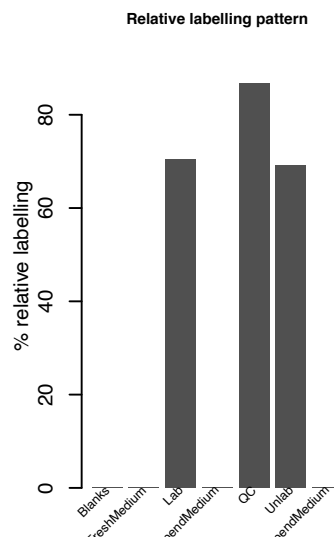



# GMP

Formula: C<sub>10</sub>H<sub>14</sub>N<sub>5</sub>O<sub>8</sub>P Mass: 363.058 Std.RT: 747 Ion: POS

# G1

■ UL ■ +1 ■ +2 ■ +3 ■ +4 ■ +5 ■ +6 ■ +7 ■ +8 ■ +9 ■ +10

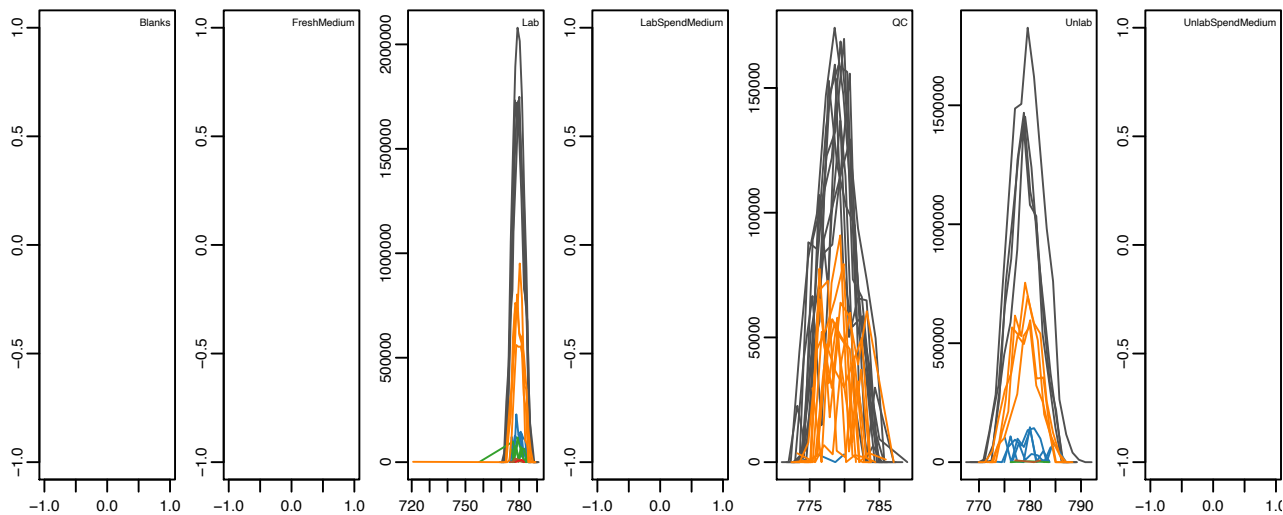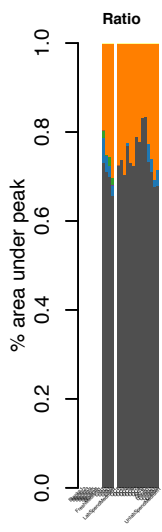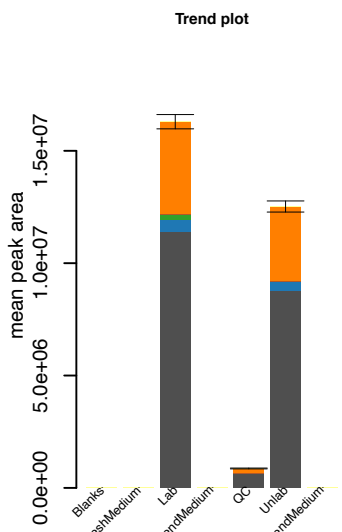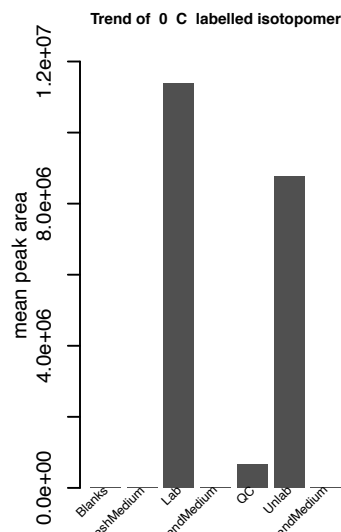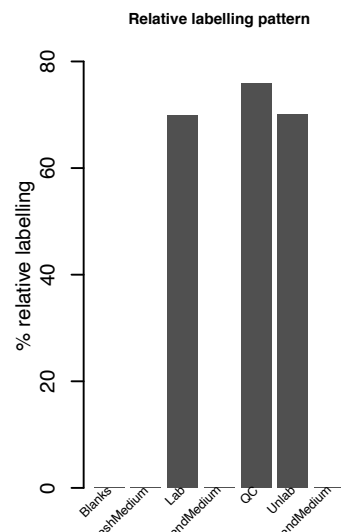

# Glycine

Formula: C<sub>2</sub>H<sub>5</sub>NO<sub>2</sub> Mass: 75.032 Std.RT: 772.8 Ion: POS

# G1

■ UL ■ +1 ■ +2

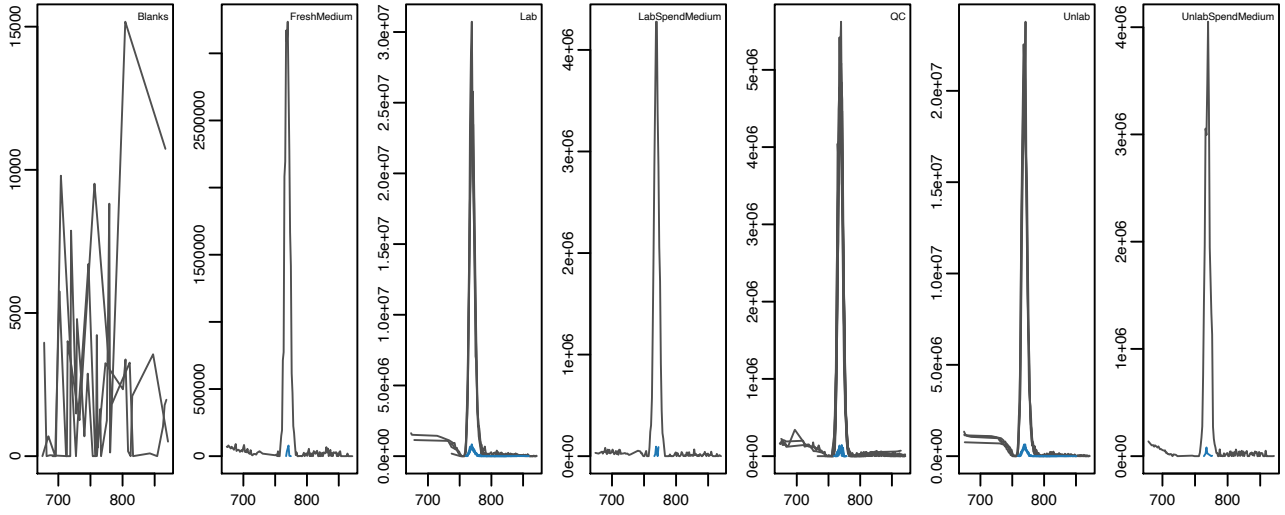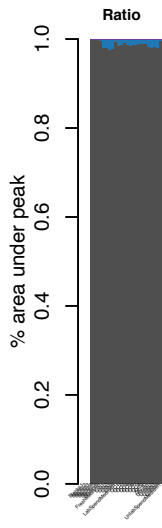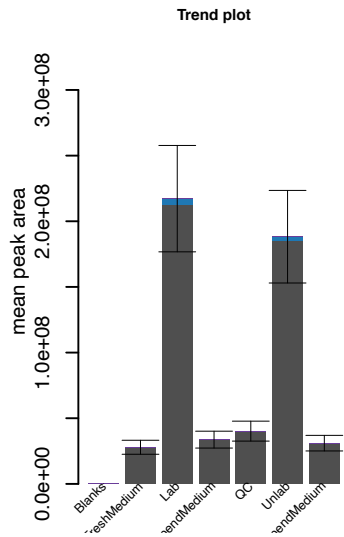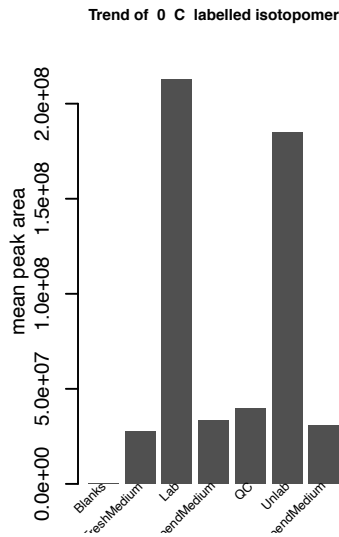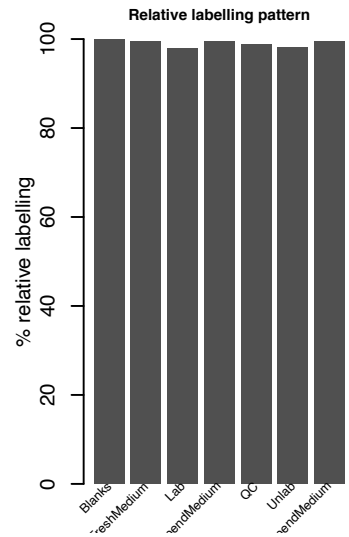

# Guanine

Formula: C<sub>5</sub>H<sub>5</sub>N<sub>5</sub>O Mass: 151.049 Std.RT: 664.2 Ion: POS

# G1

■ UL ■ +1 ■ +2 ■ +3 ■ +4 ■ +5

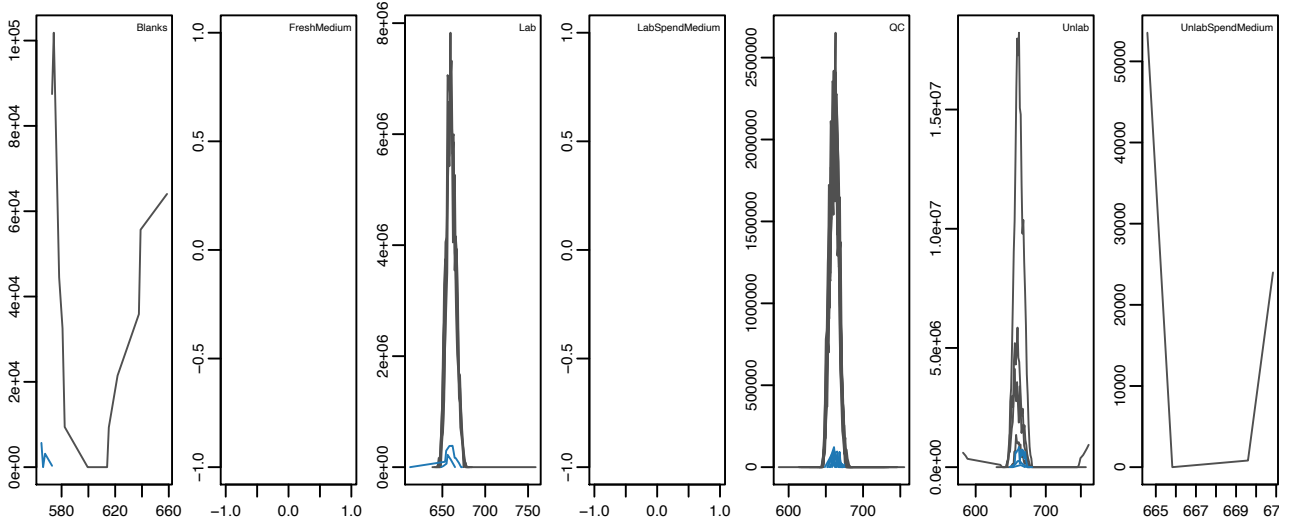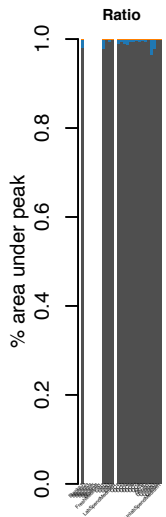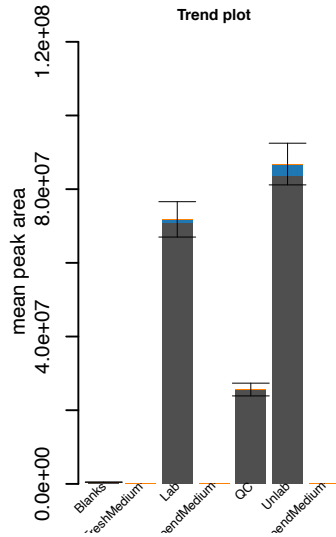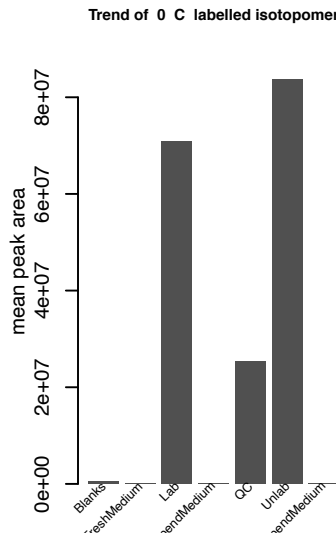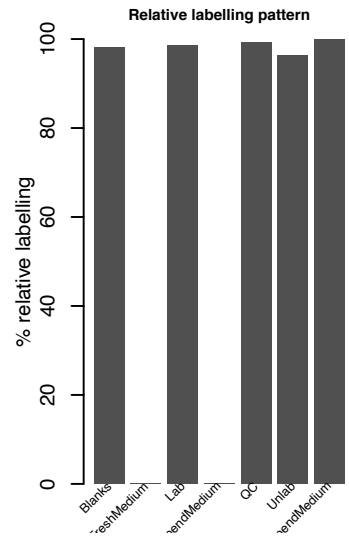

# Hypoxanthine

Formula: C<sub>5</sub>H<sub>4</sub>N<sub>4</sub>O Mass: 136.039 Std.RT: 562.2 Ion: POS

# G1

■ UL ■ +1 ■ +2 ■ +3 ■ +4 ■ +5

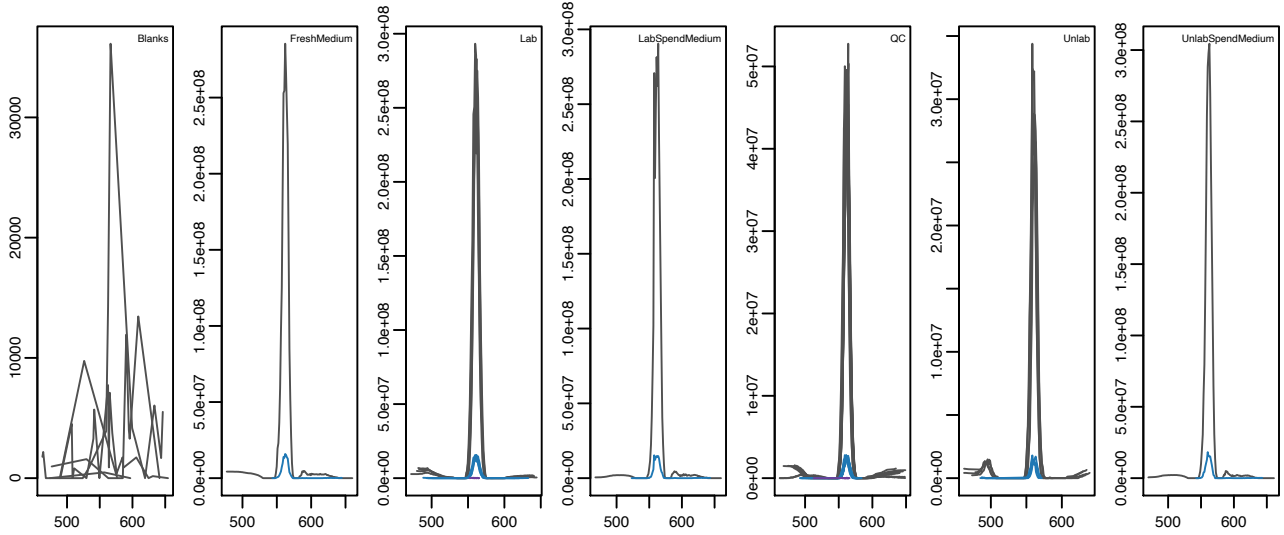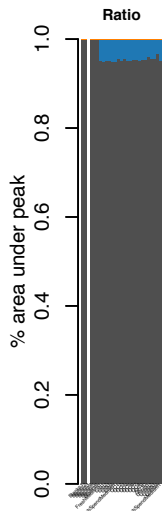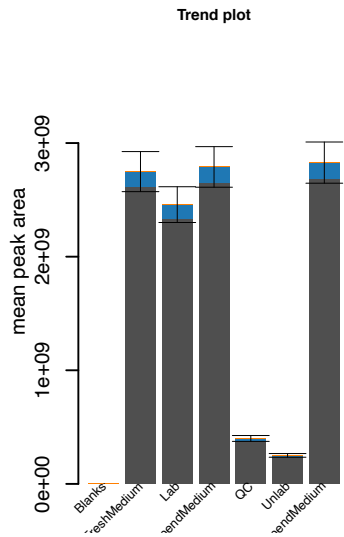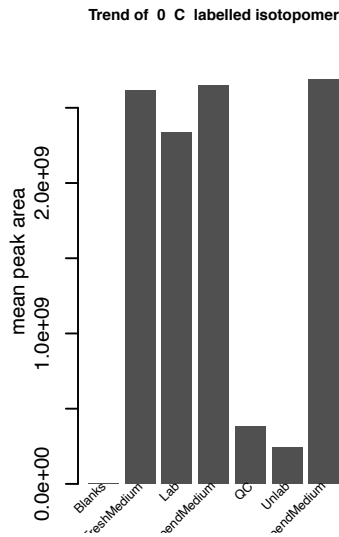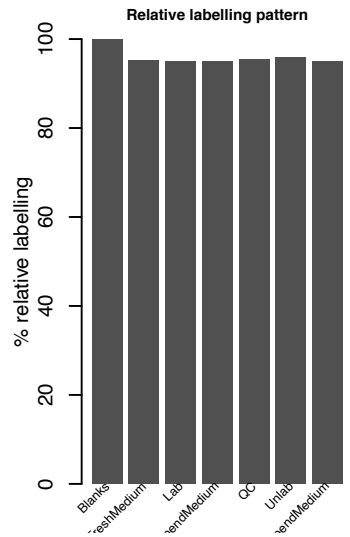

# IMP

Formula: C<sub>10</sub>H<sub>13</sub>N<sub>4</sub>O<sub>8</sub>P Mass: 348.047 Std.RT: 732.6 Ion: POS

# G1

■UL ■+1 ■+2 ■+3 ■+4 ■+5 ■+6 ■+7 ■+8 ■+9 ■+10

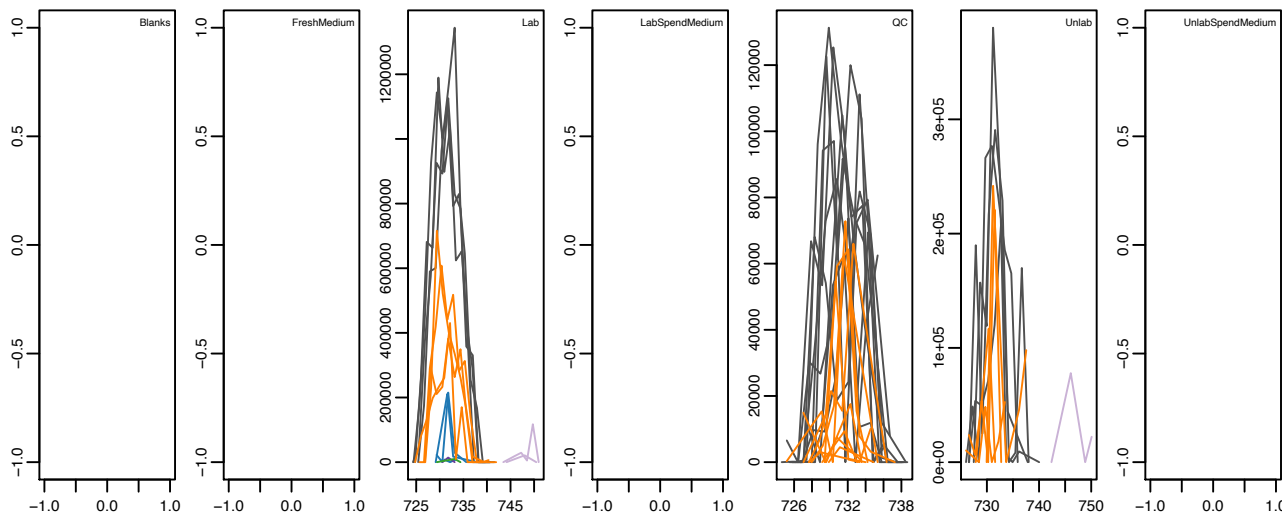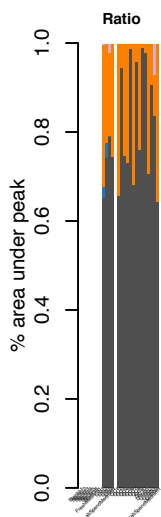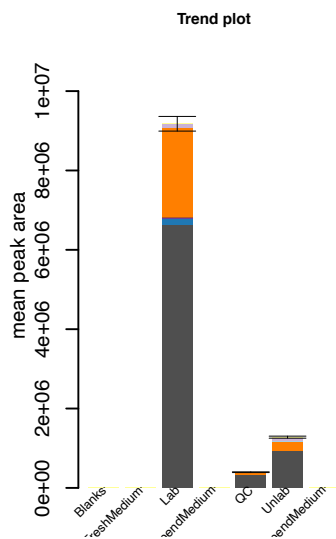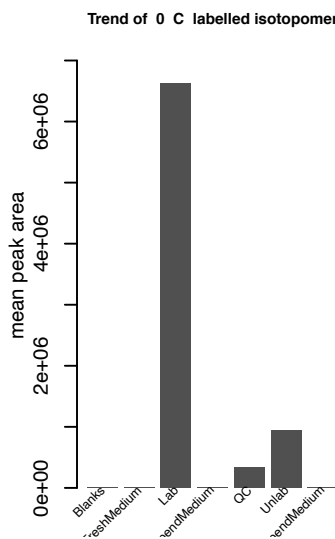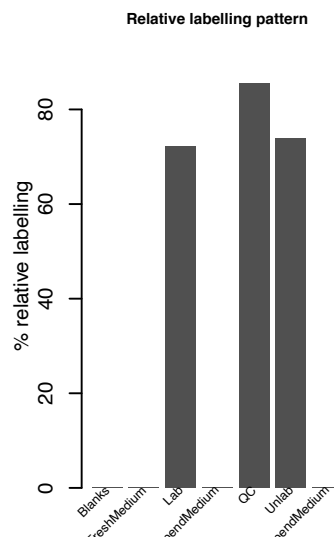

# Imidazole-4-acetate

Formula: C<sub>5</sub>H<sub>6</sub>N<sub>2</sub>O<sub>2</sub> Mass: 126.043 Std.RT: 625.2 Ion: POS

# G1

■ UL ■ +1 ■ +2 ■ +3 ■ +4 ■ +5

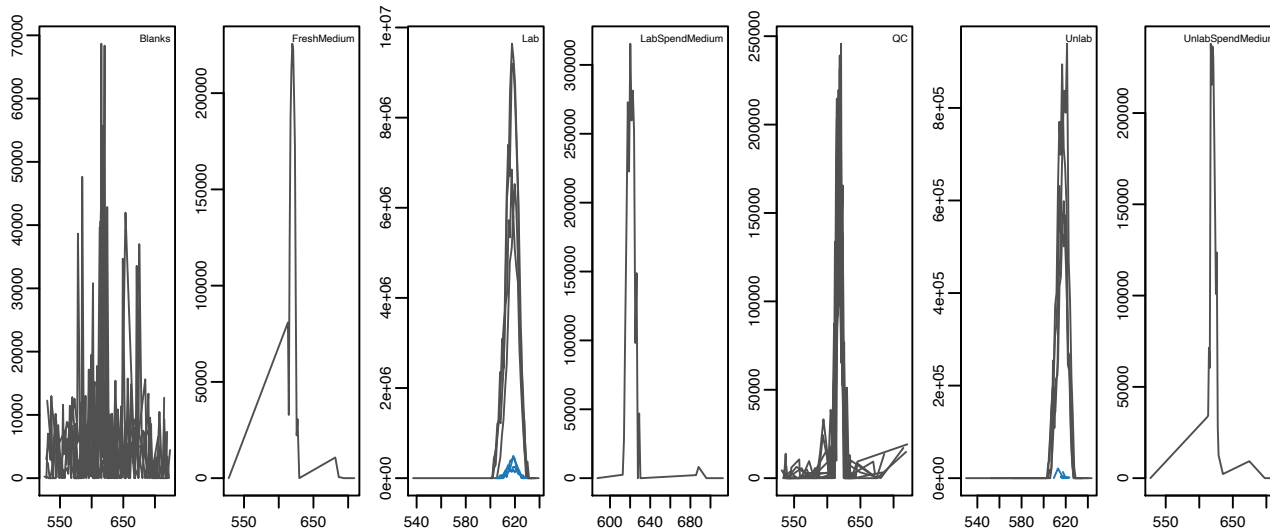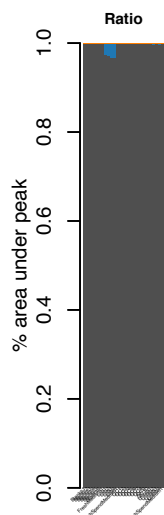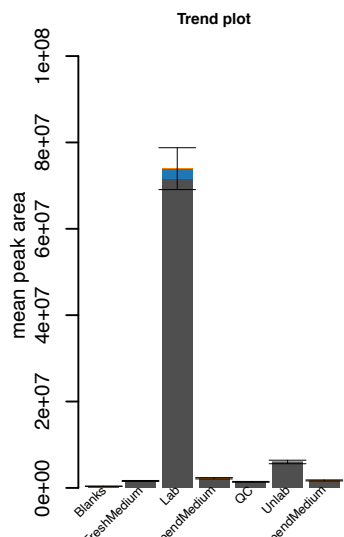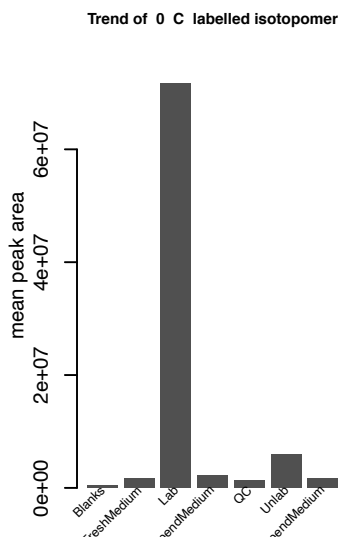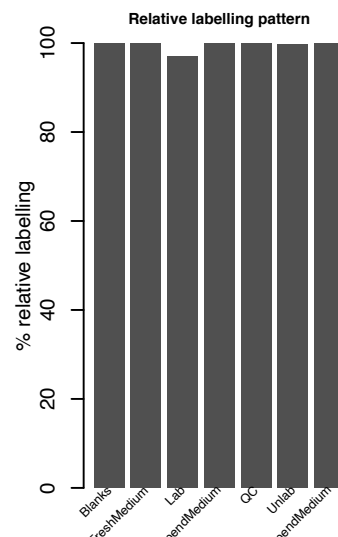

# Isonicotinic acid

Formula: C<sub>6</sub>H<sub>5</sub>NO<sub>2</sub> Mass: 123.032 Std.RT: 447.6 Ion: POS

# G1

■ UL ■ +1 ■ +2 ■ +3 ■ +4 ■ +5 ■ +6

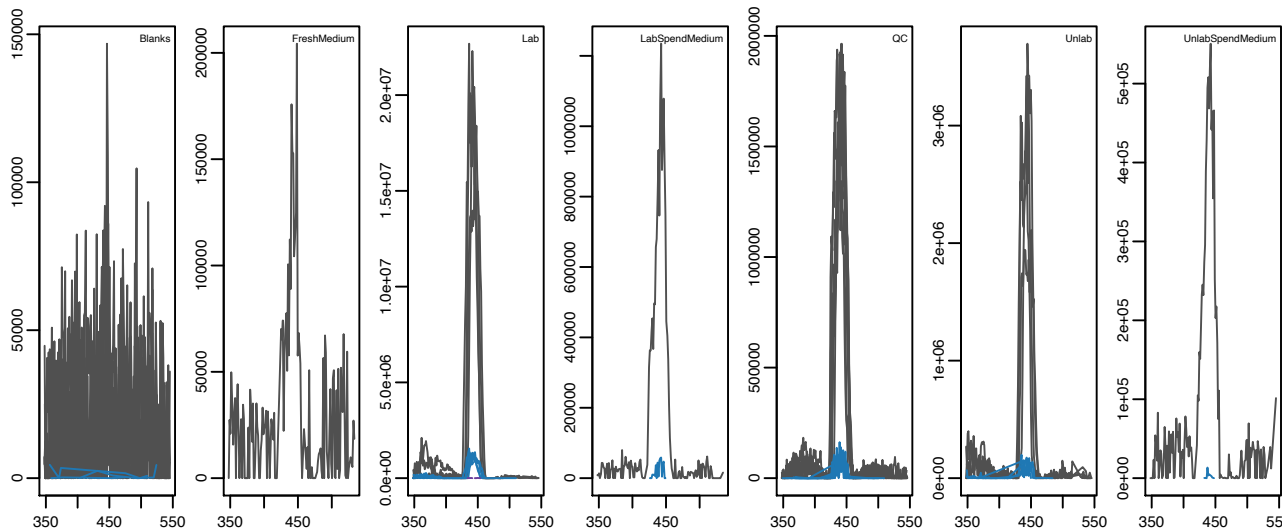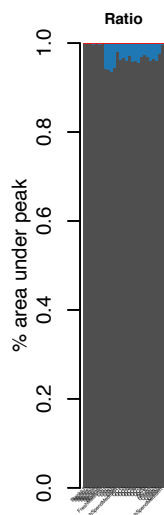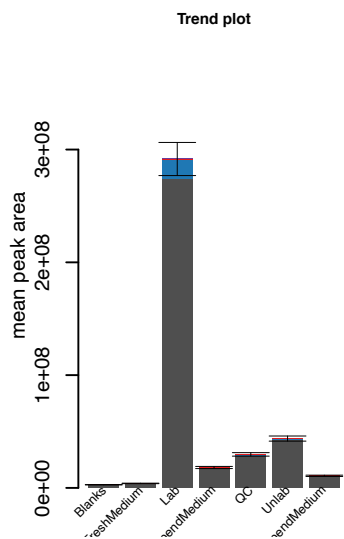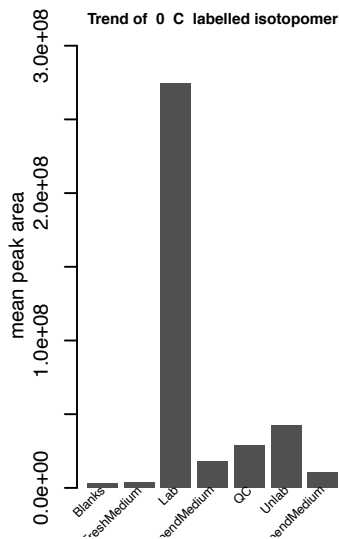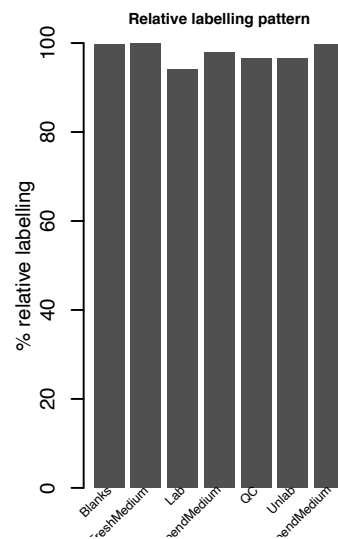

# L-Alanine

Formula: C<sub>3</sub>H<sub>7</sub>NO<sub>2</sub> Mass: 89.048 Std.RT: 737.4 Ion: POS

# G1

■ UL ■ +1 ■ +2 ■ +3

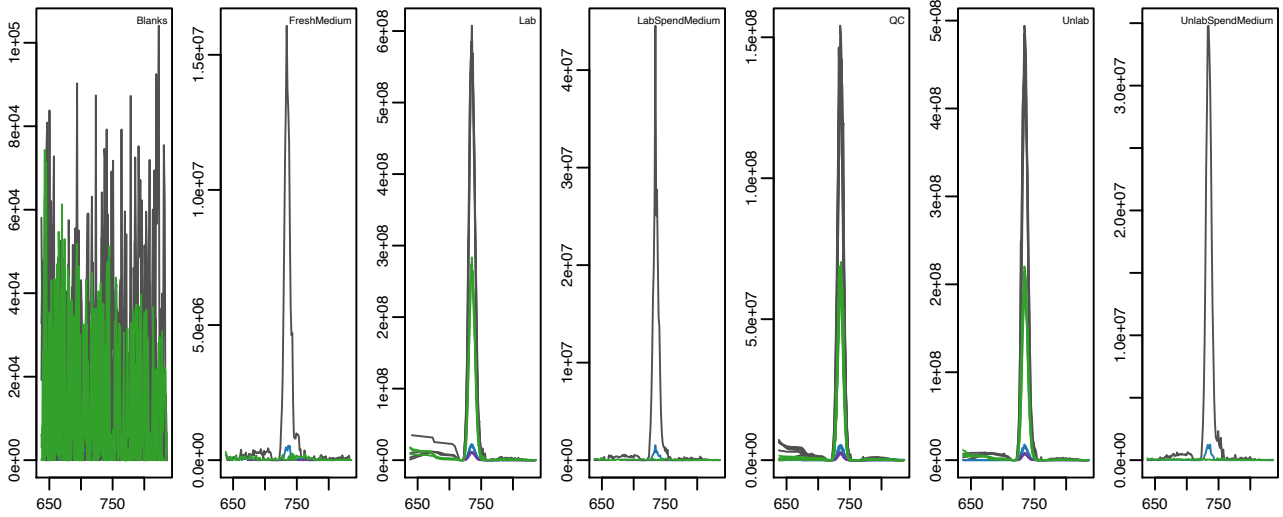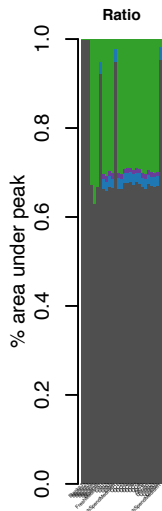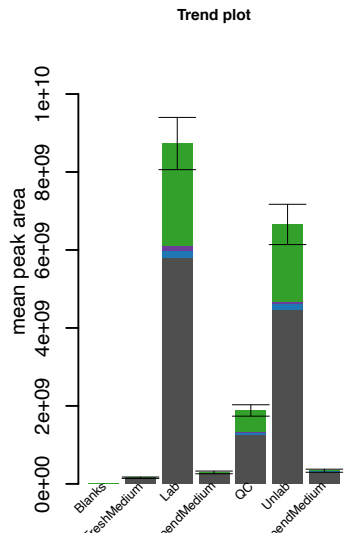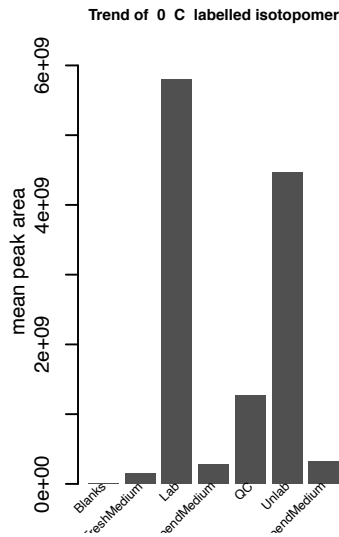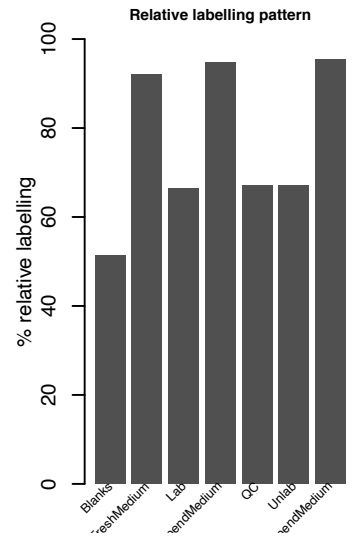



# L-Arginine

Formula: C<sub>6</sub>H<sub>14</sub>N<sub>4</sub>O<sub>2</sub> Mass: 174.112 Std.RT: 1209.6 Ion: POS

# G1

■ UL ■ +1 ■ +2 ■ +3 ■ +4 ■ +5 ■ +6

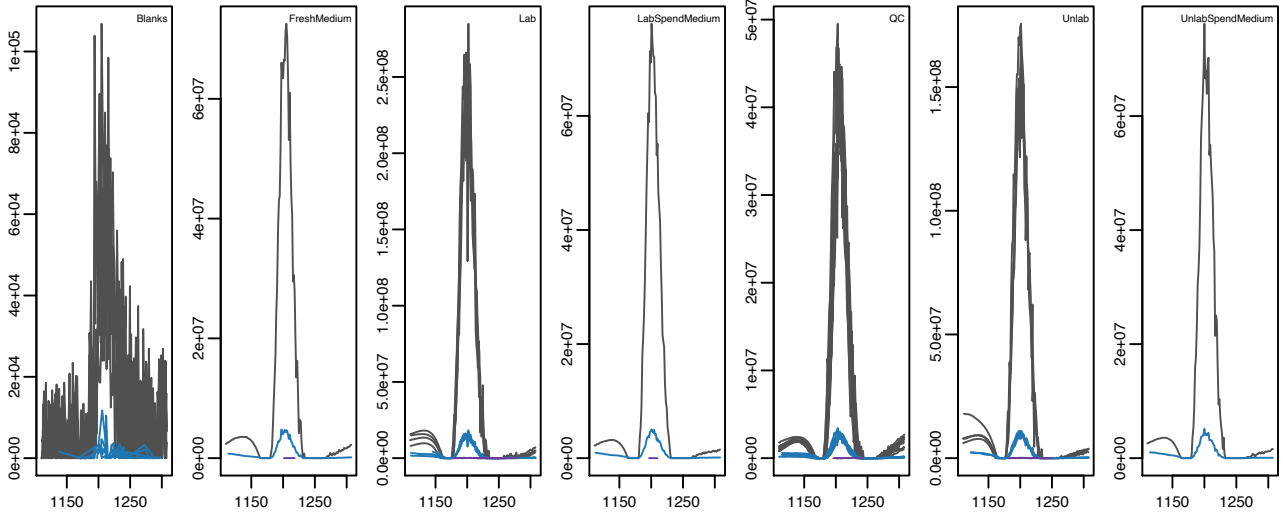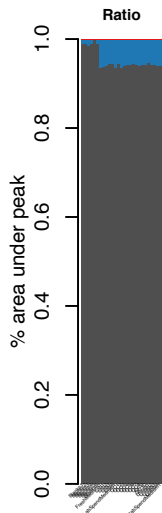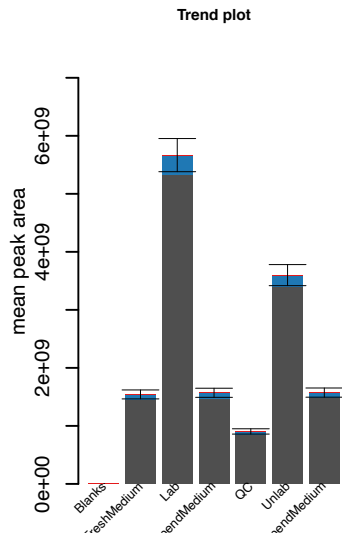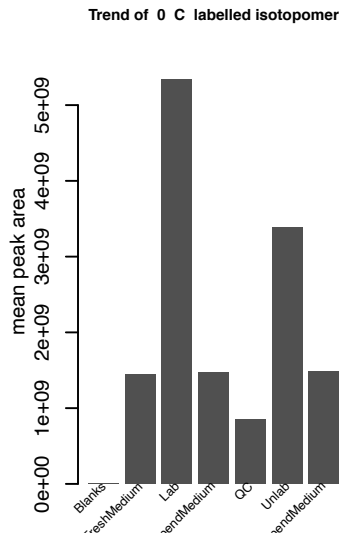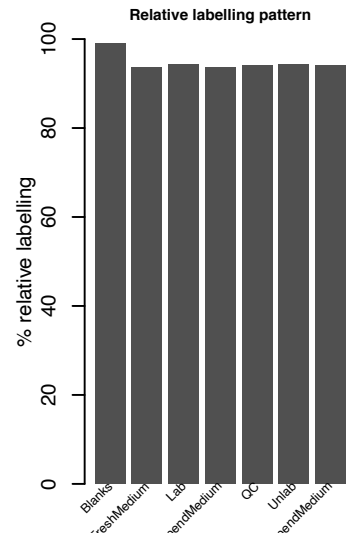

# L-Asparagine

Formula: C<sub>4</sub>H<sub>8</sub>N<sub>2</sub>O<sub>3</sub> Mass: 132.053 Std.RT: 754.8 Ion: POS

# G1

■ UL ■ +1 ■ +2 ■ +3 ■ +4

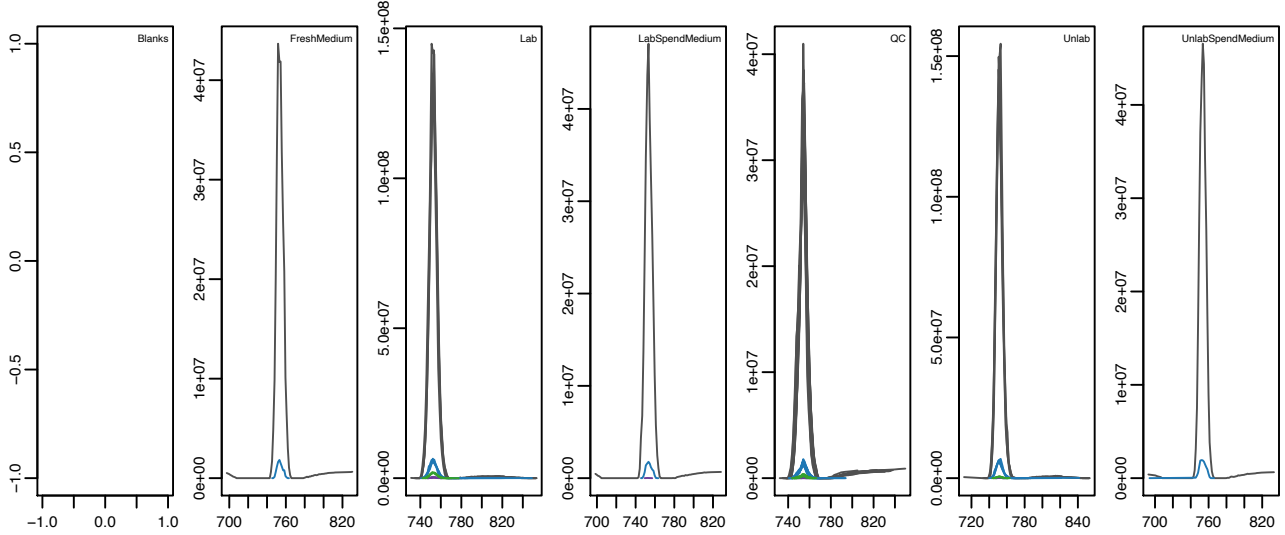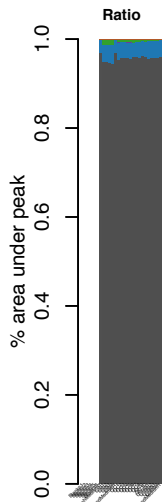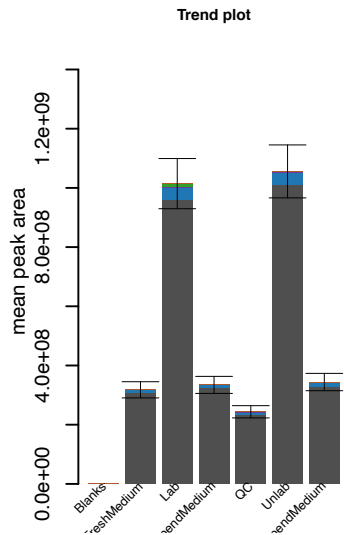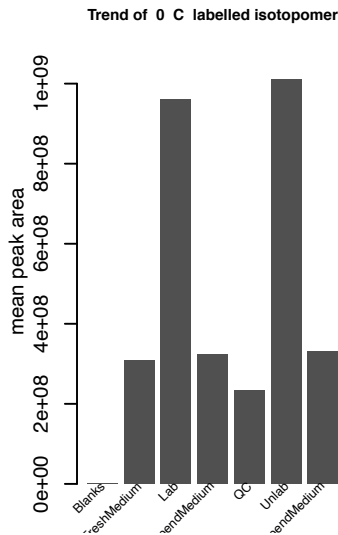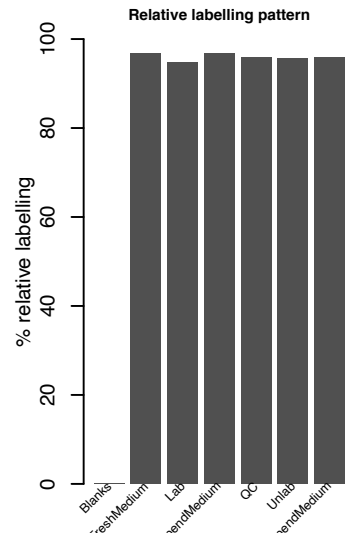

# L-Carnitine

Formula: C<sub>7</sub>H<sub>15</sub>NO<sub>3</sub> Mass: 161.105 Std.RT: 670.8 Ion: POS

# G1

■ UL ■ +1 ■ +2 ■ +3 ■ +4 ■ +5 ■ +6 ■ +7

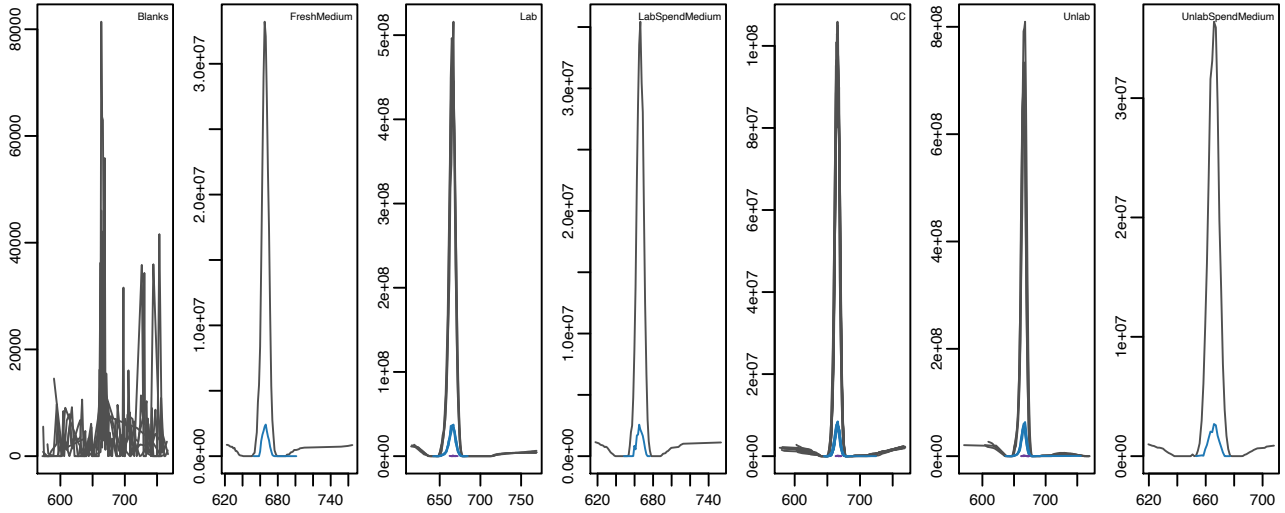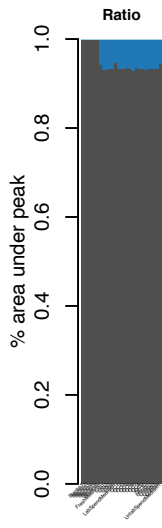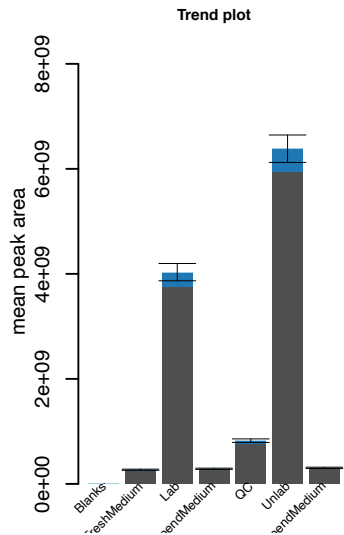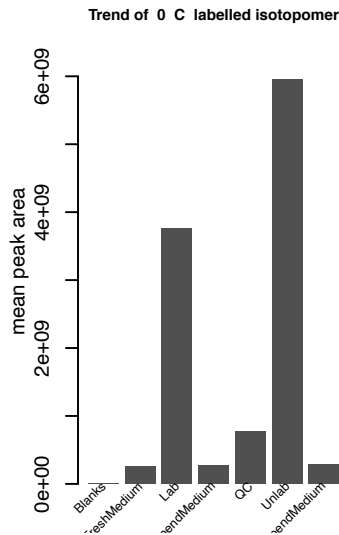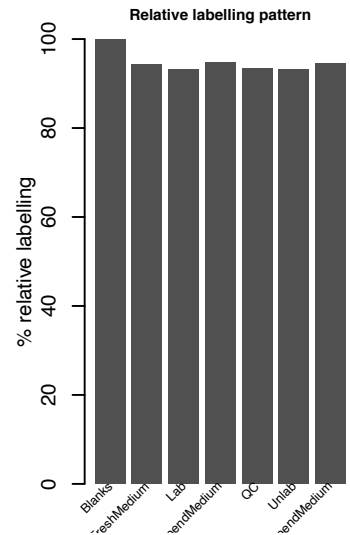

# L-Citrulline

Formula: C<sub>6</sub>H<sub>13</sub>N<sub>3</sub>O<sub>3</sub> Mass: 175.096 Std.RT: 767.4 Ion: POS

# G1

■ UL ■ +1 ■ +2 ■ +3 ■ +4 ■ +5 ■ +6

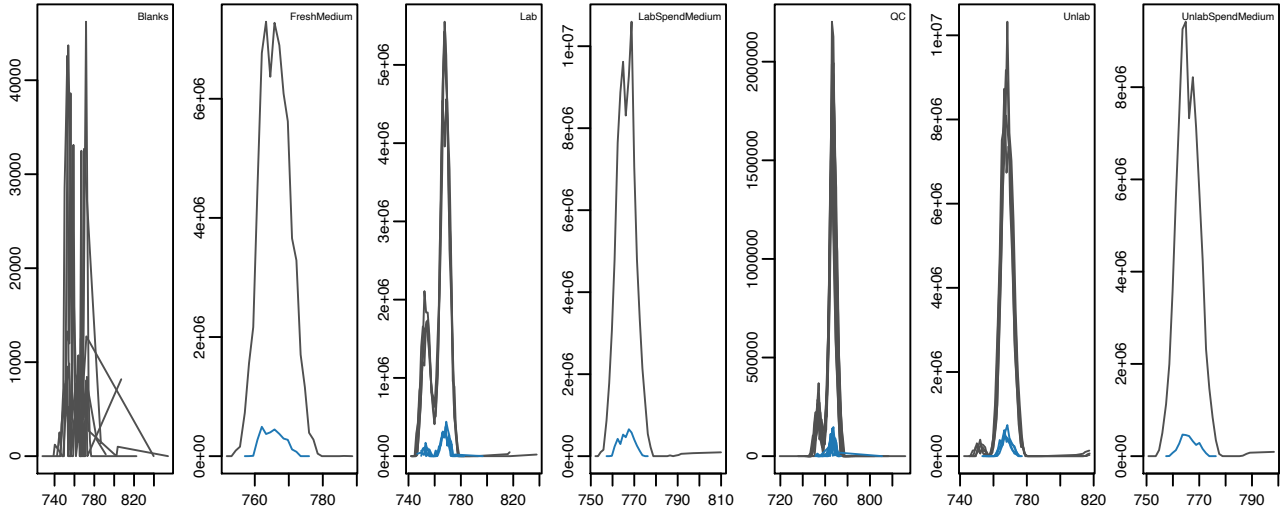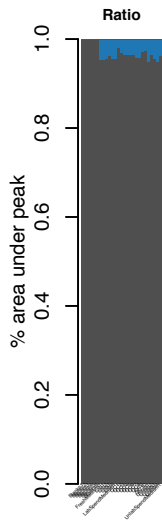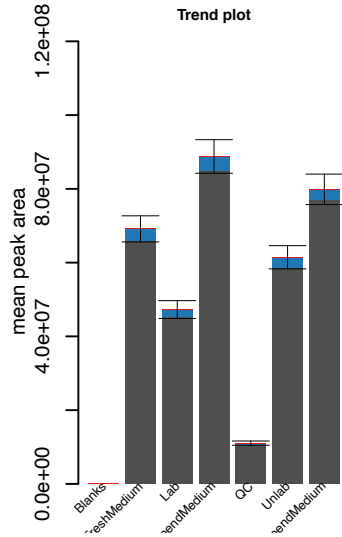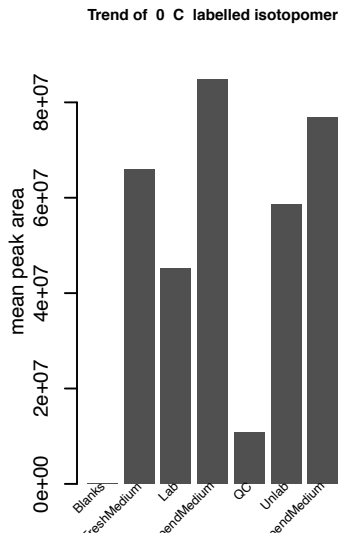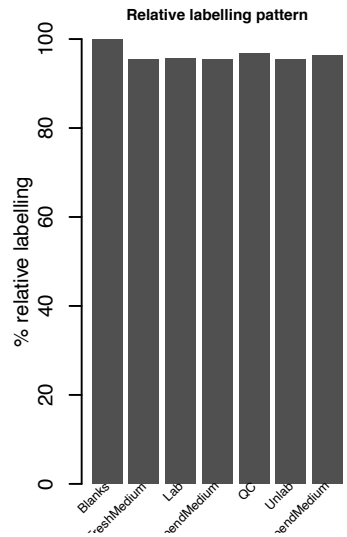

# L-Cystathionine

Formula: C7H14N2O4S Mass: 222.067 Std.RT: 798.6 Ion: POS

# G1

■ UL ■ +1 ■ +2 ■ +3 ■ +4 ■ +5 ■ +6 ■ +7

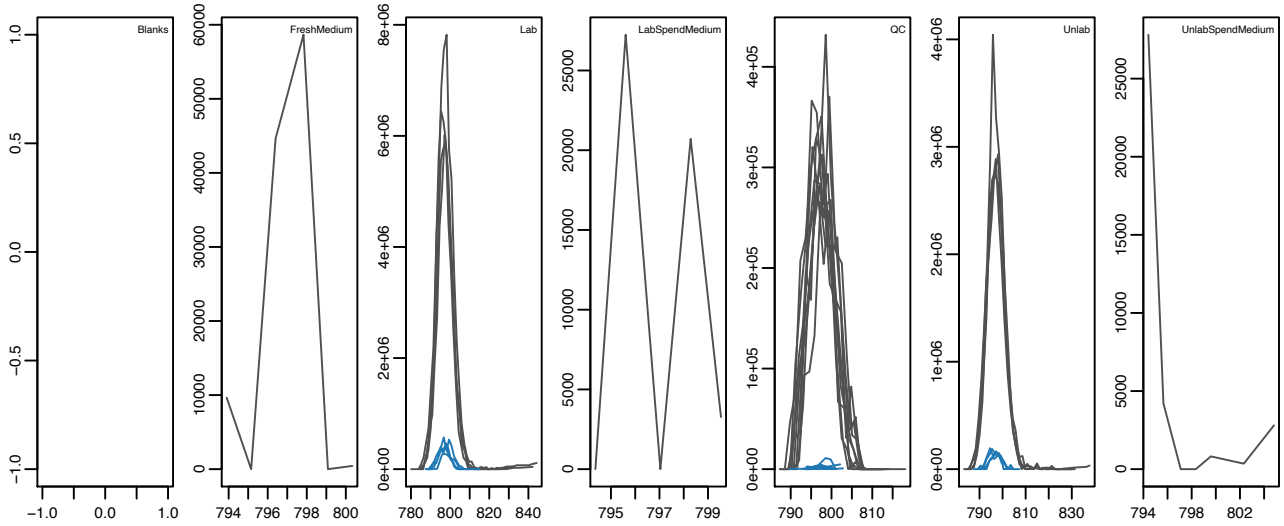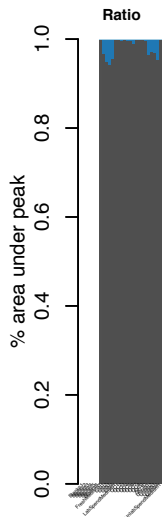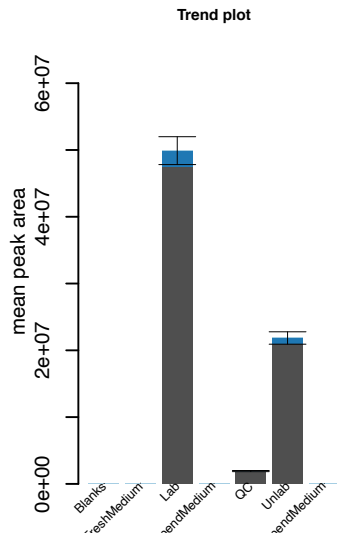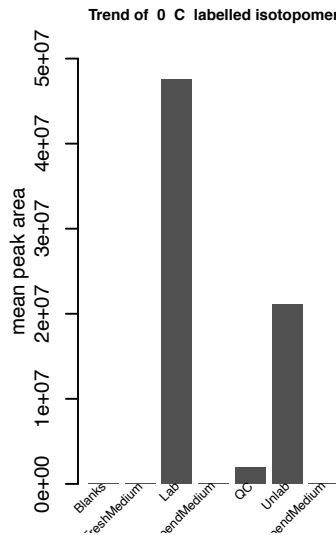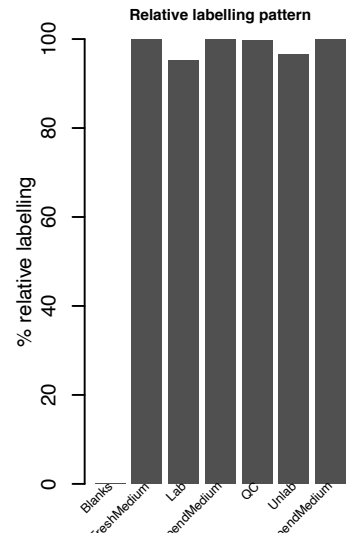

# L-Glutamate

Formula: C<sub>5</sub>H<sub>9</sub>NO<sub>4</sub> Mass: 147.053 Std.RT: 723.6 Ion: POS

# G1

■ UL ■ +1 ■ +2 ■ +3 ■ +4 ■ +5

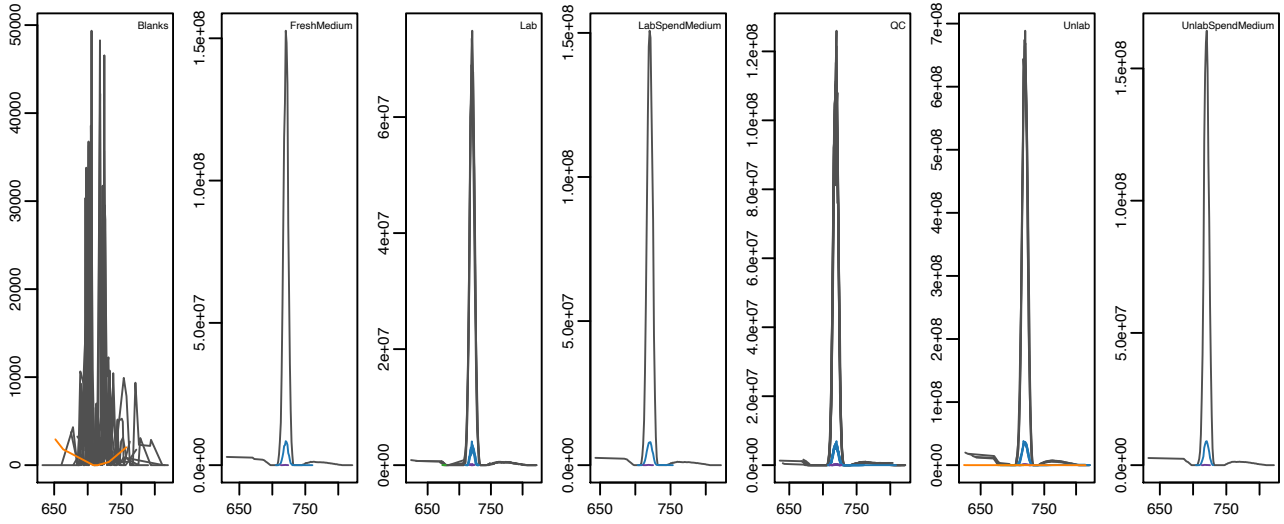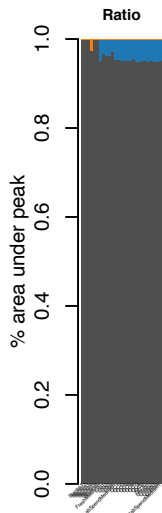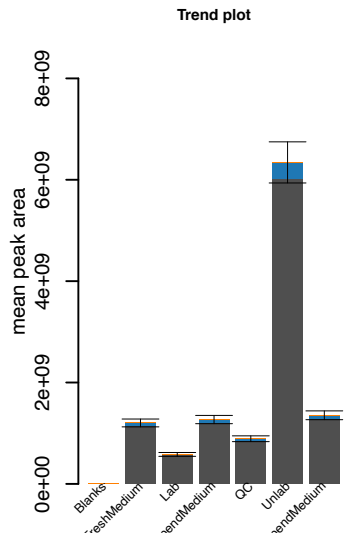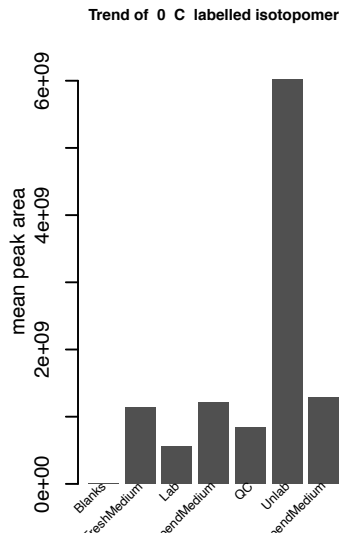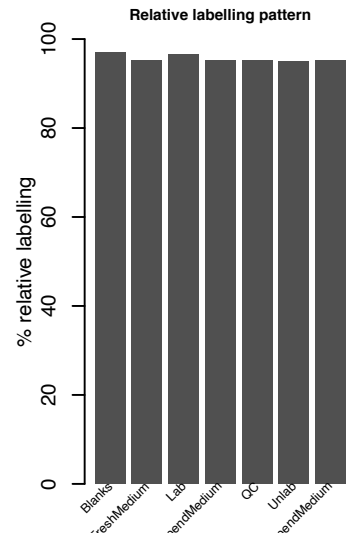

# L-Glutamine

Formula: C<sub>5</sub>H<sub>10</sub>N<sub>2</sub>O<sub>3</sub> Mass: 146.069 Std.RT: 739.2 Ion: POS

# G1

■ UL ■ +1 ■ +2 ■ +3 ■ +4 ■ +5

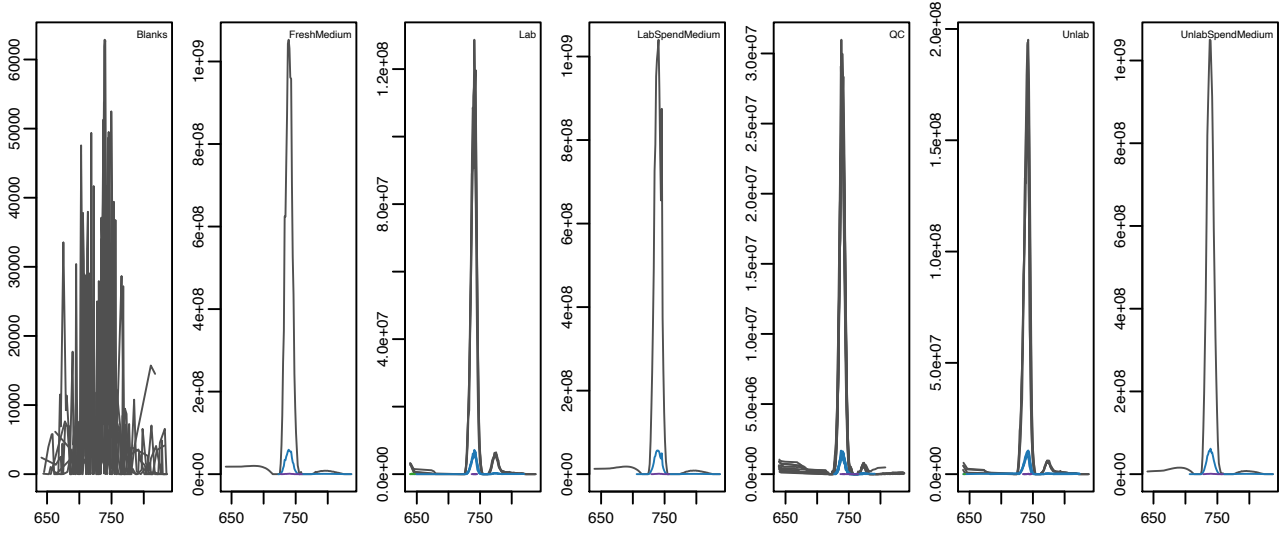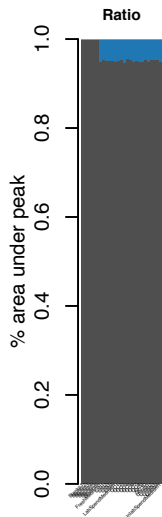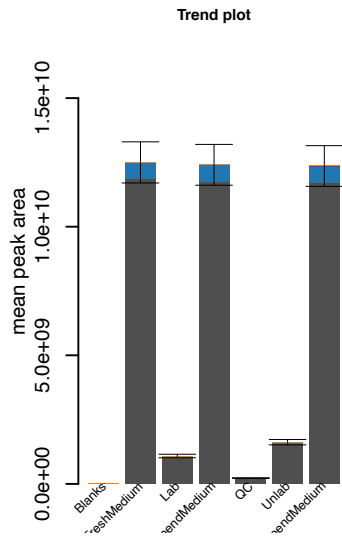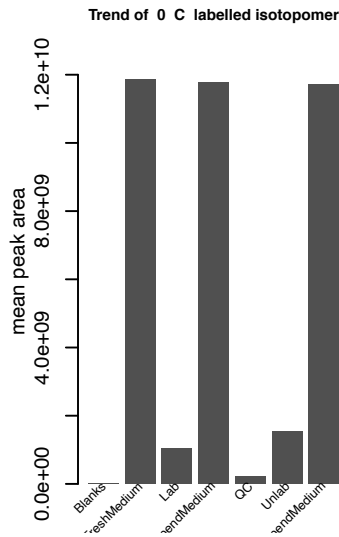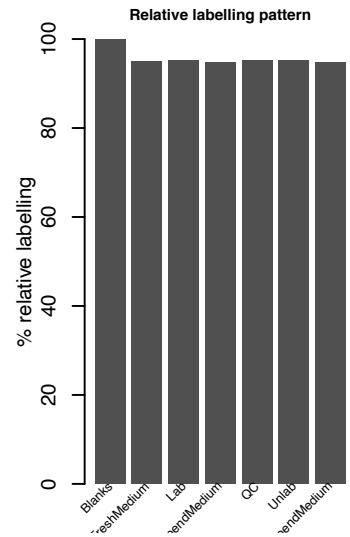

# L-Leucine

Formula: C<sub>6</sub>H<sub>13</sub>NO<sub>2</sub> Mass: 131.095 Std.RT: 578.4 Ion: POS

# G1

■ UL ■ +1 ■ +2 ■ +3 ■ +4 ■ +5 ■ +6

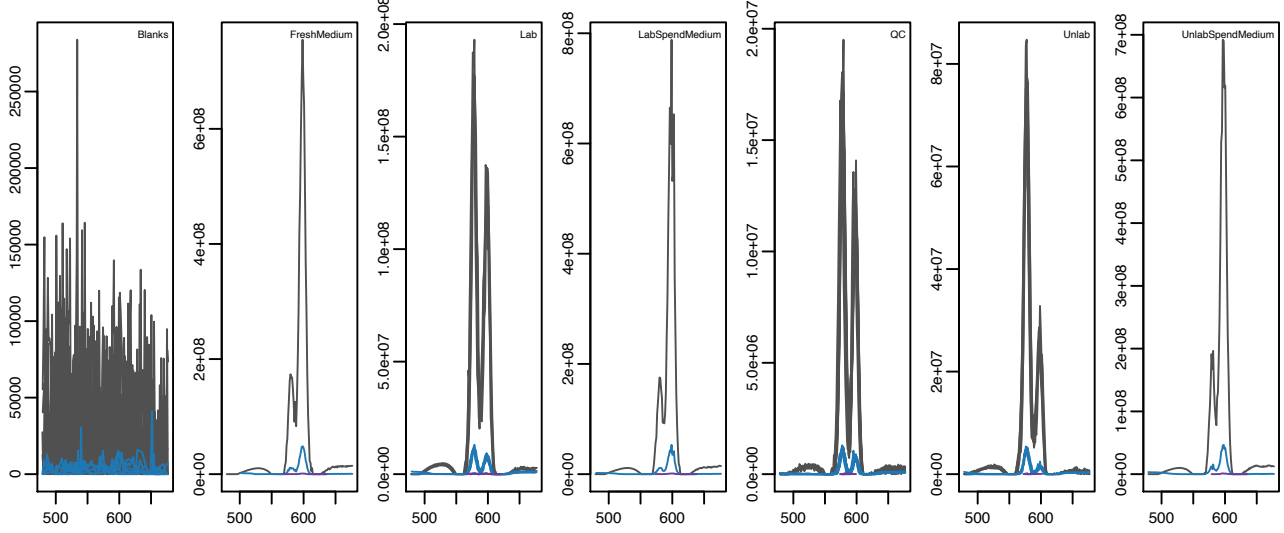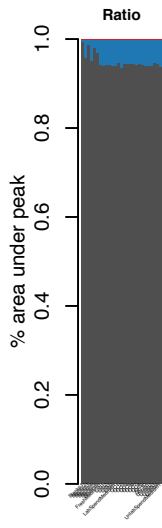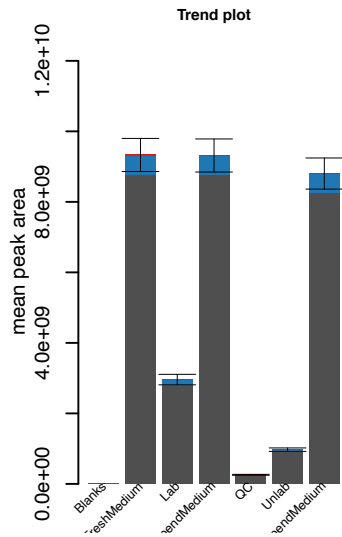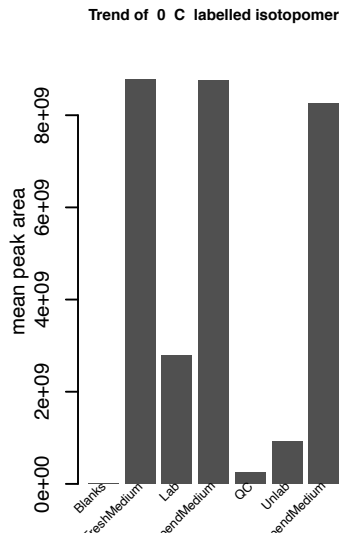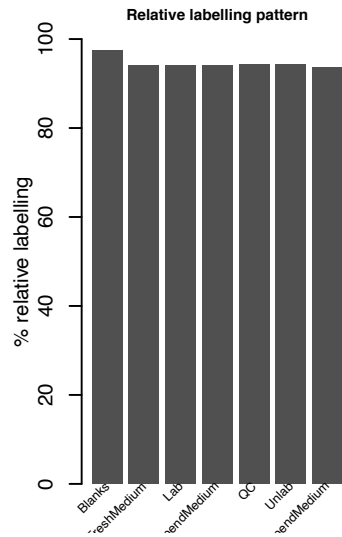



# L-Serine

Formula: C<sub>3</sub>H<sub>7</sub>NO<sub>3</sub> Mass: 105.043 Std.RT: 775.2 Ion: POS

# G1

■ UL ■ +1 ■ +2 ■ +3

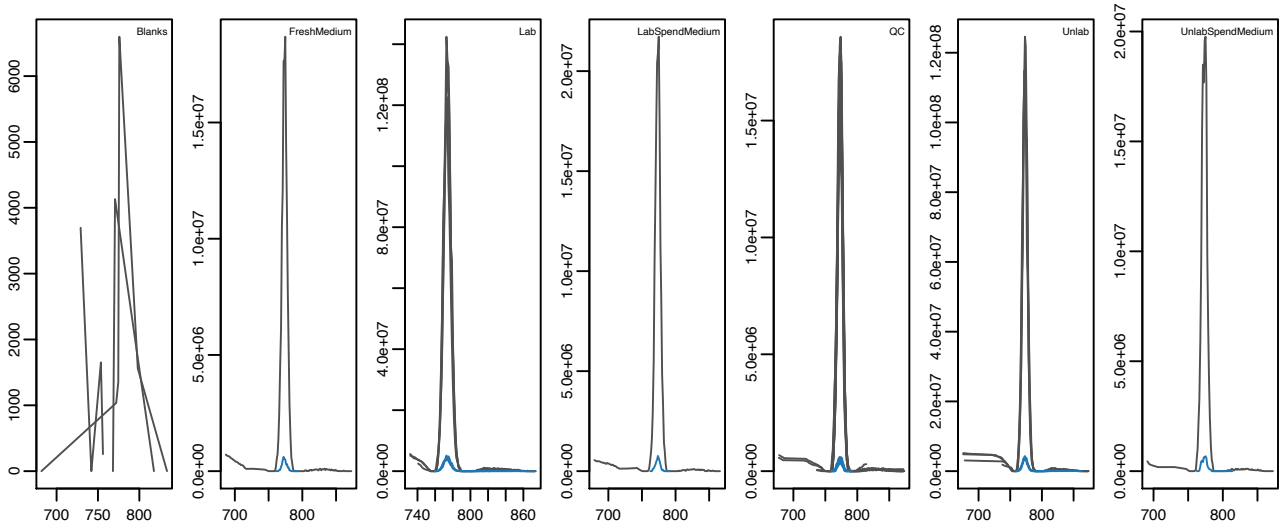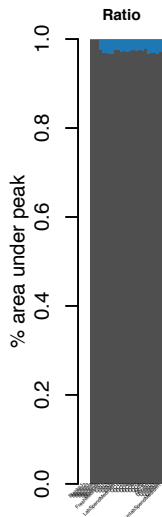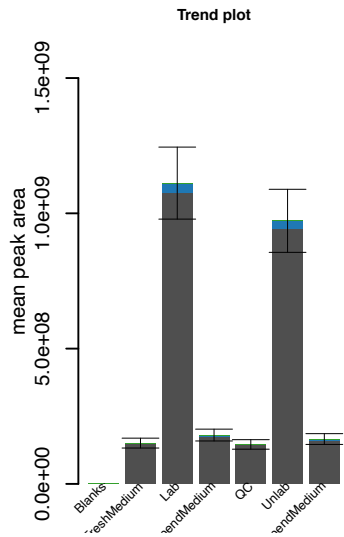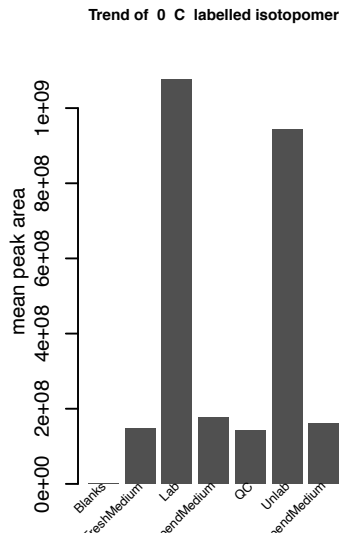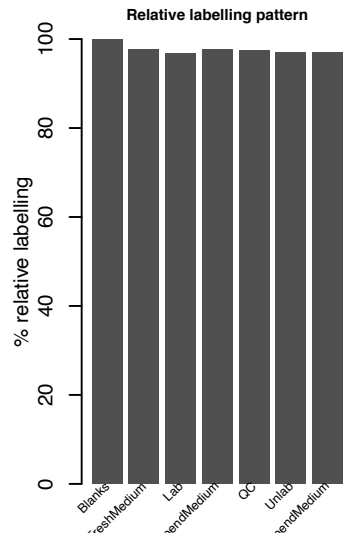

# L-Threonine

Formula: C<sub>4</sub>H<sub>9</sub>NO<sub>3</sub> Mass: 119.058 Std.RT: 728.4 Ion: POS

# G1

■ UL ■ +1 ■ +2 ■ +3 ■ +4

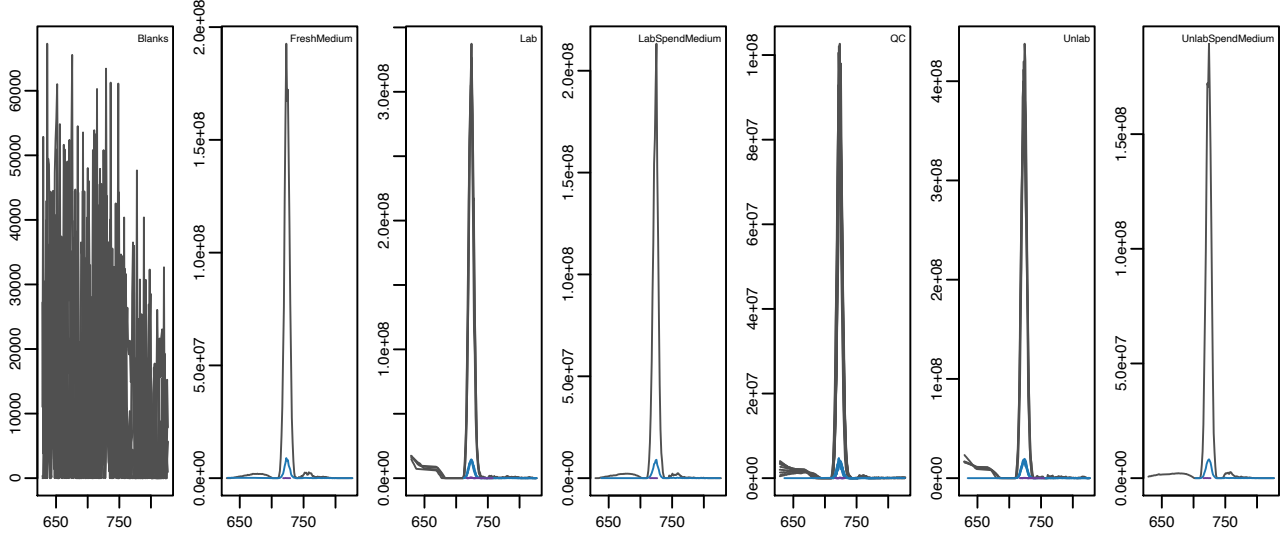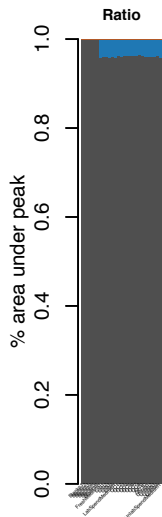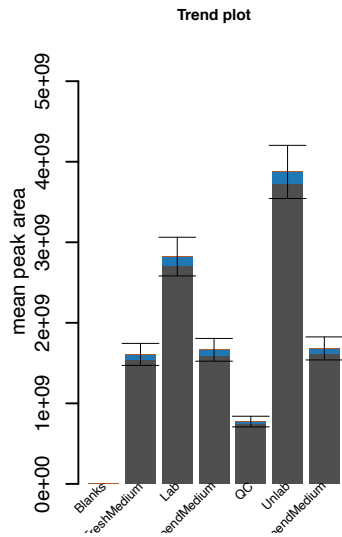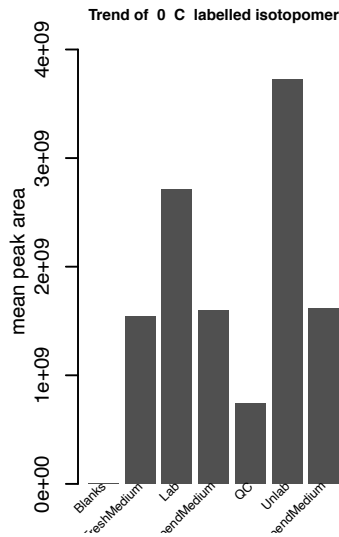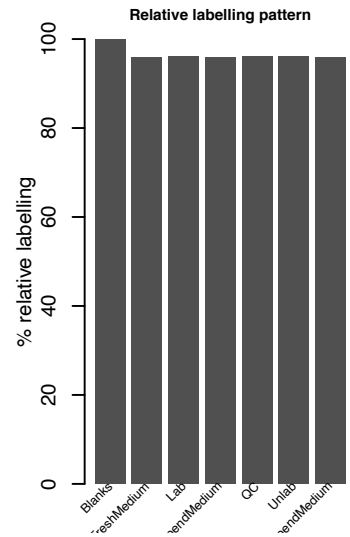

# L-Tryptophan

Formula: C<sub>11</sub>H<sub>12</sub>N<sub>2</sub>O<sub>2</sub> Mass: 204.09 Std.RT: 630 Ion: POS

# G1

■ UL ■ +1 ■ +2 ■ +3 ■ +4 ■ +5 ■ +6 ■ +7 ■ +8 ■ +9 ■ +10 ■ +11

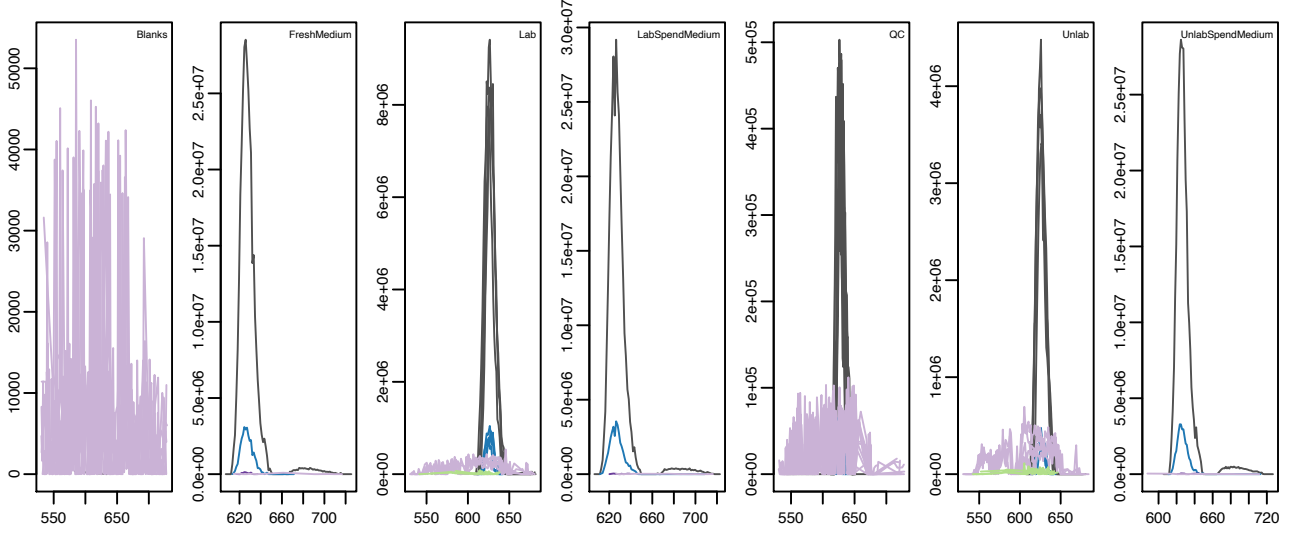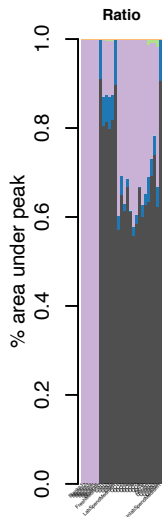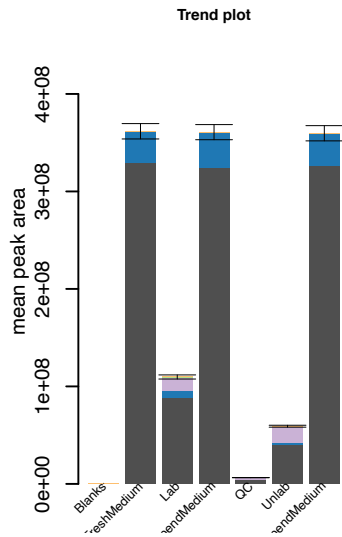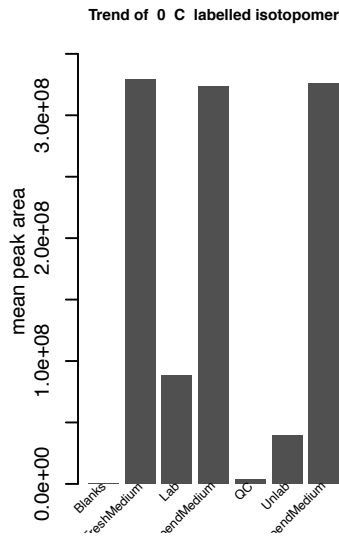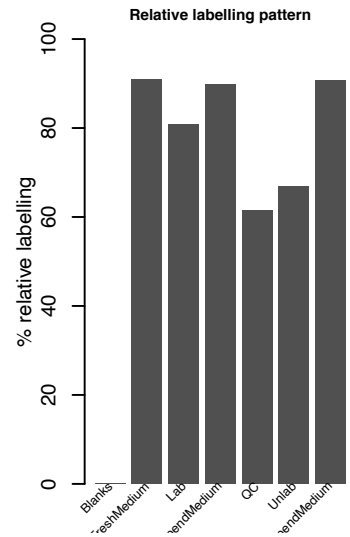

# L-Tyrosine

Formula: C<sub>9</sub>H<sub>11</sub>NO<sub>3</sub> Mass: 181.074 Std.RT: 680.4 Ion: POS

# G1

■ UL ■ +1 ■ +2 ■ +3 ■ +4 ■ +5 ■ +6 ■ +7 ■ +8 ■ +9

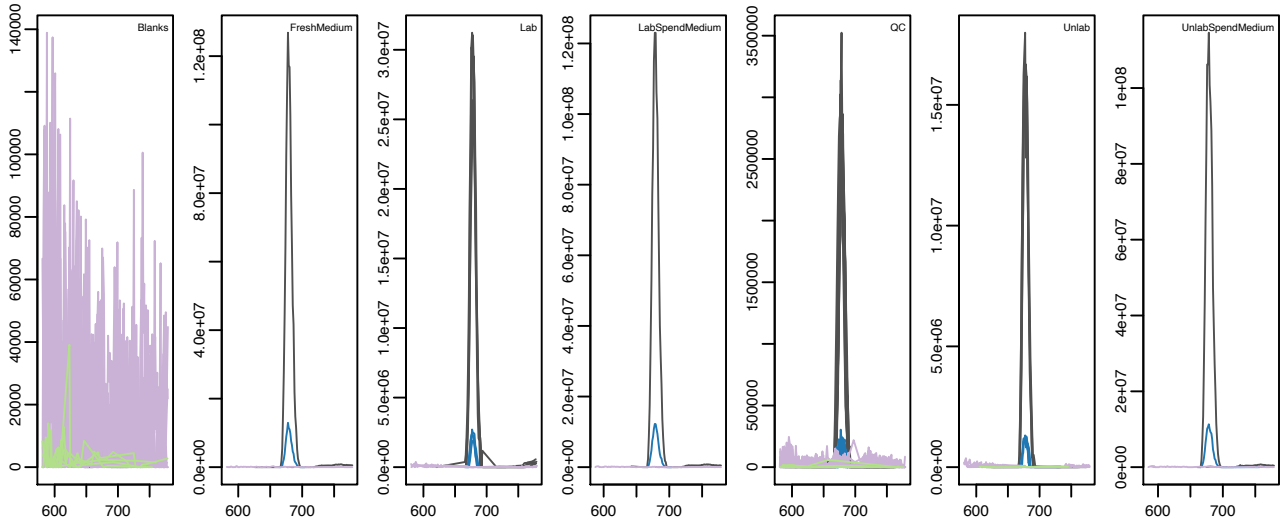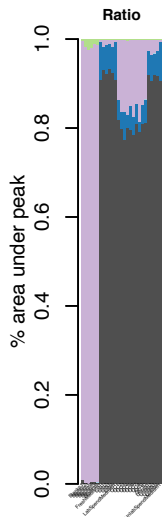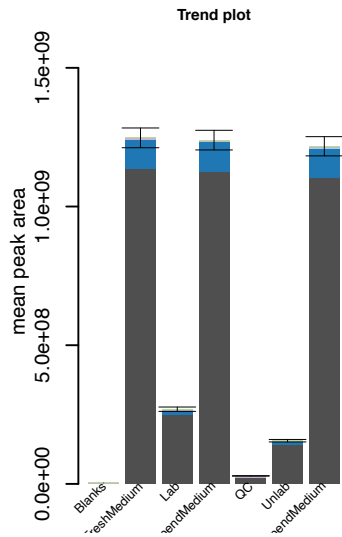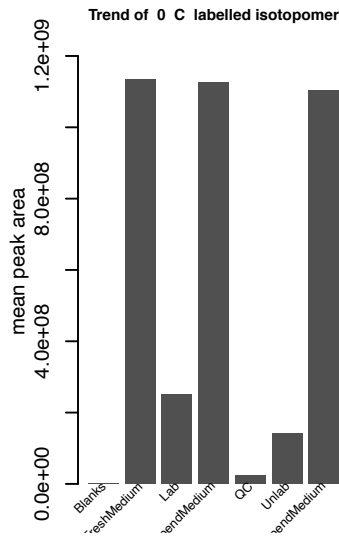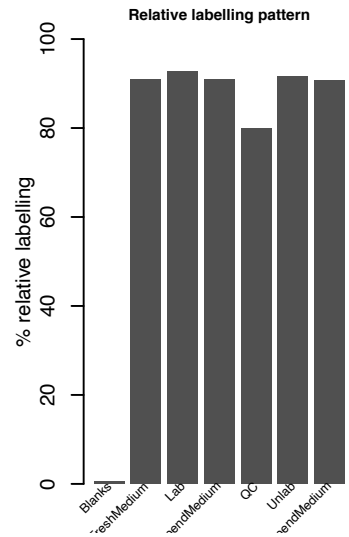

# L-Valine

Formula: C<sub>5</sub>H<sub>11</sub>NO<sub>2</sub> Mass: 117.079 Std.RT: 651 Ion: POS

# G1

■ UL ■ +1 ■ +2 ■ +3 ■ +4 ■ +5

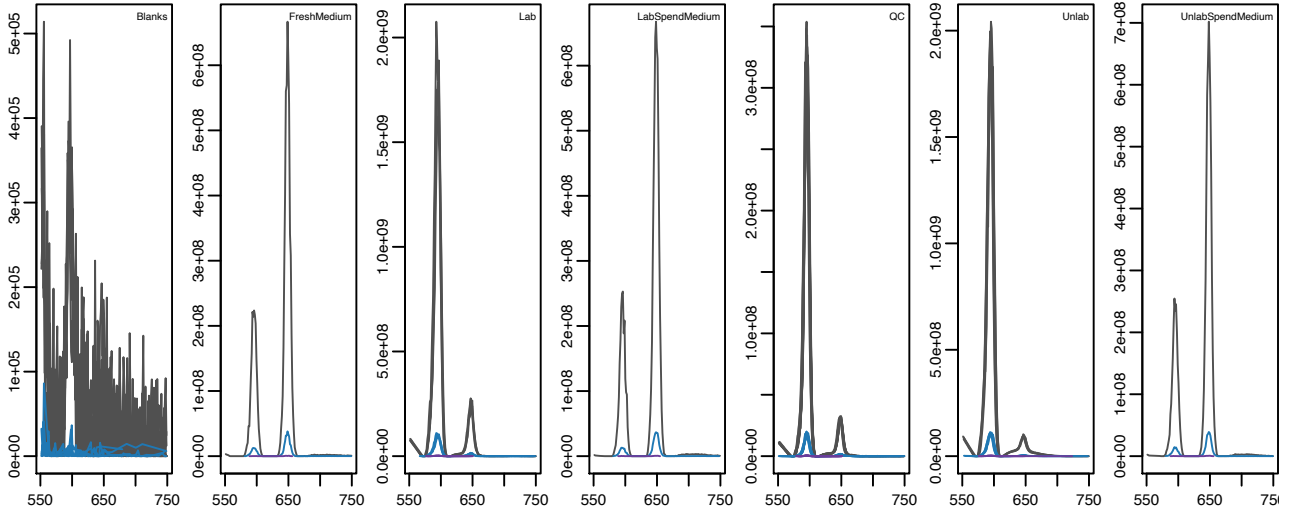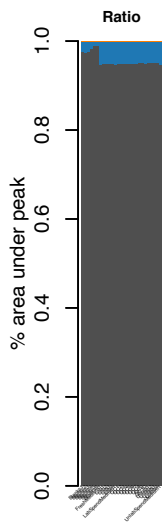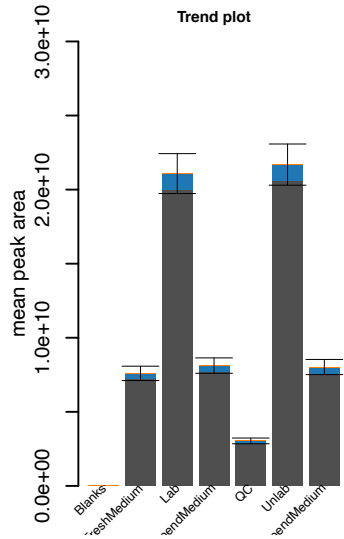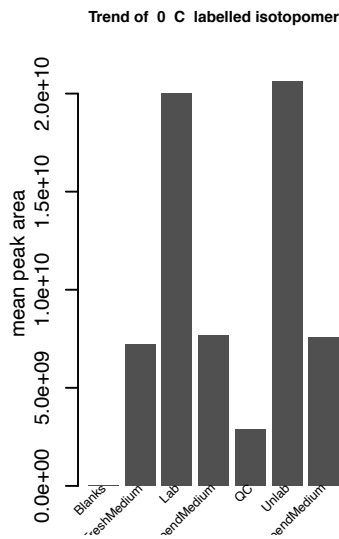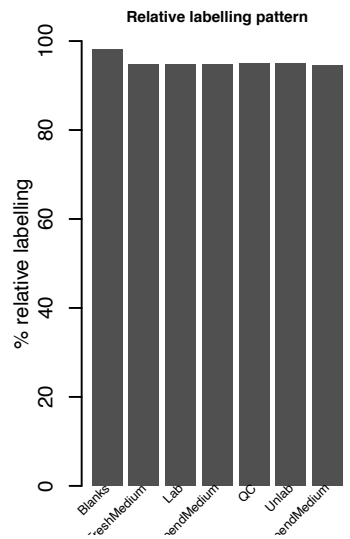

# L-isoIeucine

Formula: C<sub>6</sub>H<sub>13</sub>NO<sub>2</sub> Mass: 131.095 Std.RT: 623.4 Ion: POS

# G1

■ UL ■ +1 ■ +2 ■ +3 ■ +4 ■ +5 ■ +6

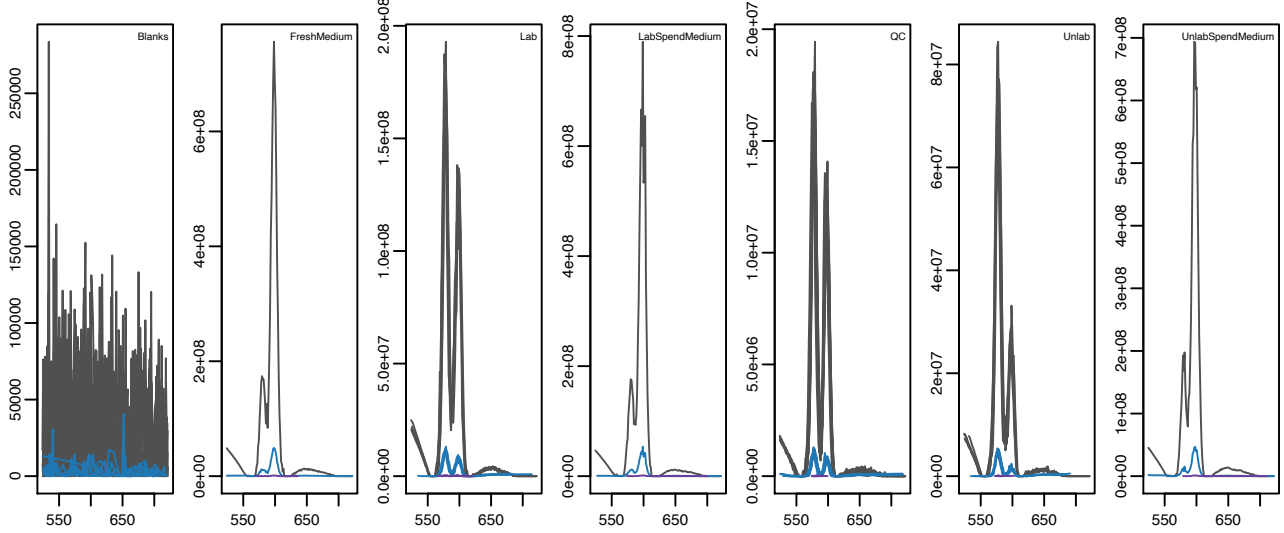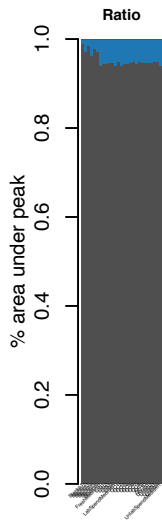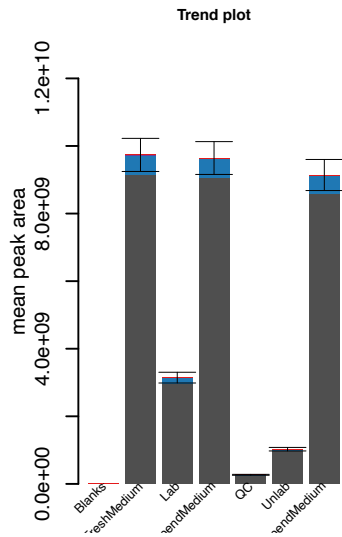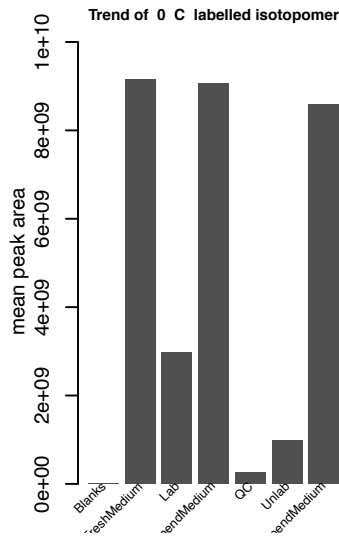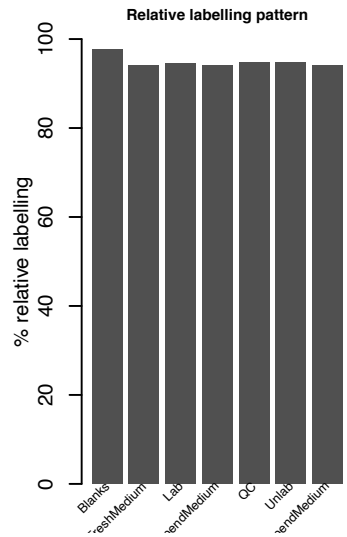

# N-Acetylornithine

Formula: C<sub>7</sub>H<sub>14</sub>N<sub>2</sub>O<sub>3</sub> Mass: 174.1 Std.RT: 735 Ion: POS

# G1

■ UL ■ +1 ■ +2 ■ +3 ■ +4 ■ +5 ■ +6 ■ +7

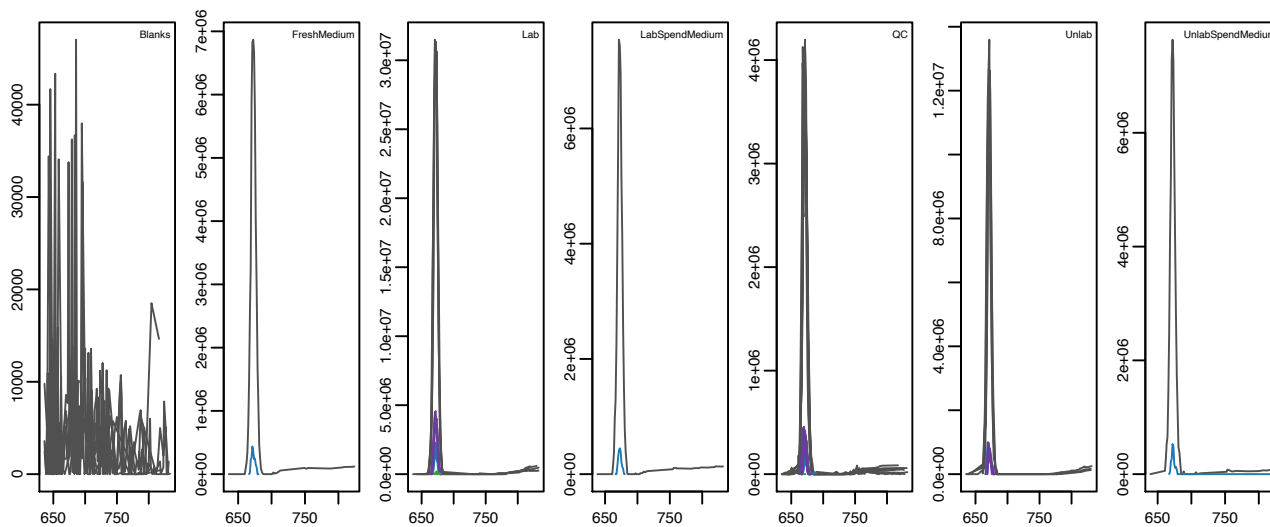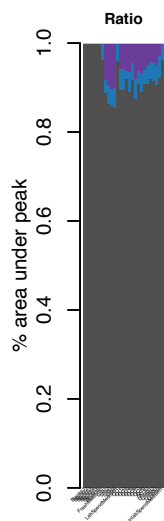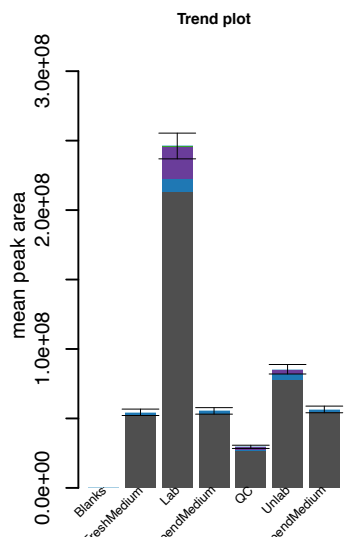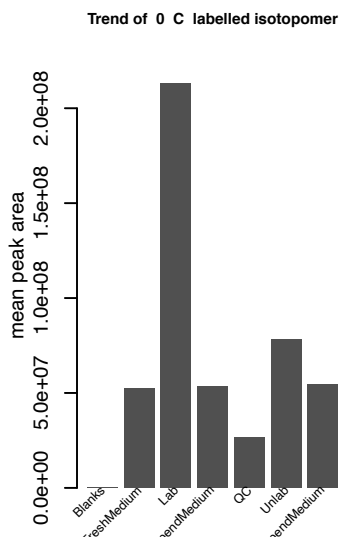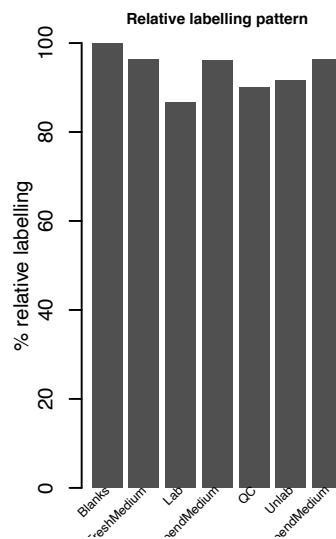

# N2-Acetyl-L-lysine

Formula: C<sub>8</sub>H<sub>16</sub>N<sub>2</sub>O<sub>3</sub> Mass: 188.116 Std.RT: 727.2 Ion: POS

# G1

■ UL ■ +1 ■ +2 ■ +3 ■ +4 ■ +5 ■ +6 ■ +7 ■ +8

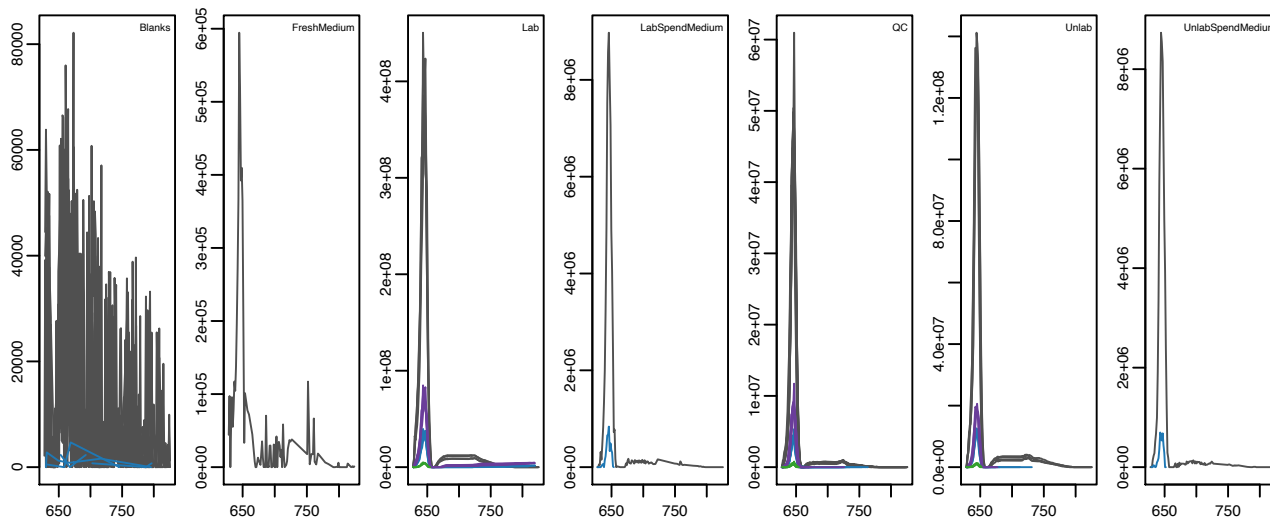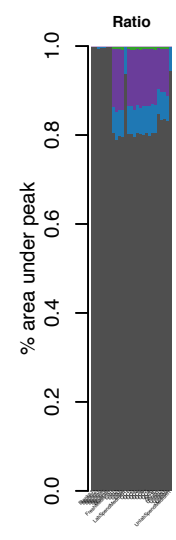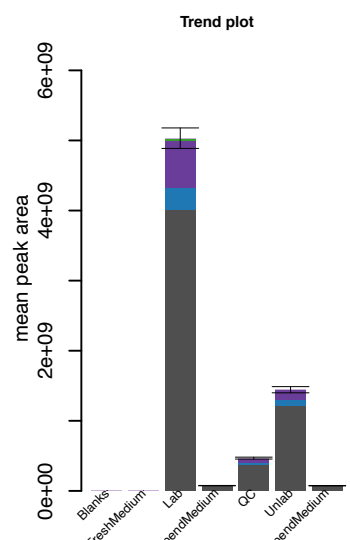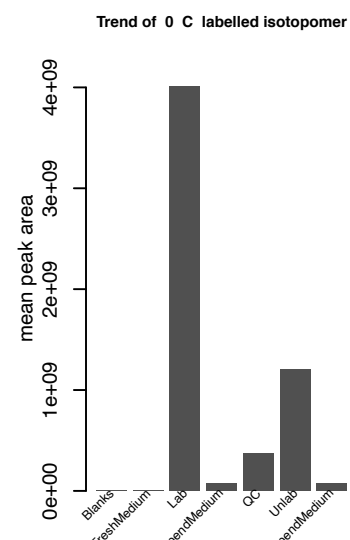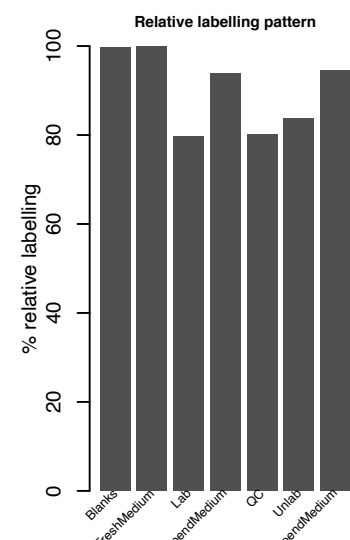



# NAD+

Formula: C<sub>21</sub>H<sub>27</sub>N<sub>7</sub>O<sub>14</sub>P<sub>2</sub> Mass: 663.109 Std.RT: 678 Ion: POS

# G1

■ UL ■ +1 ■ +2 ■ +3 ■ +4 ■ +5 ■ +6 ■ +7 ■ +8 ■ +9 ■ +10 ■ +11 ■ +12 ■ +13 ■

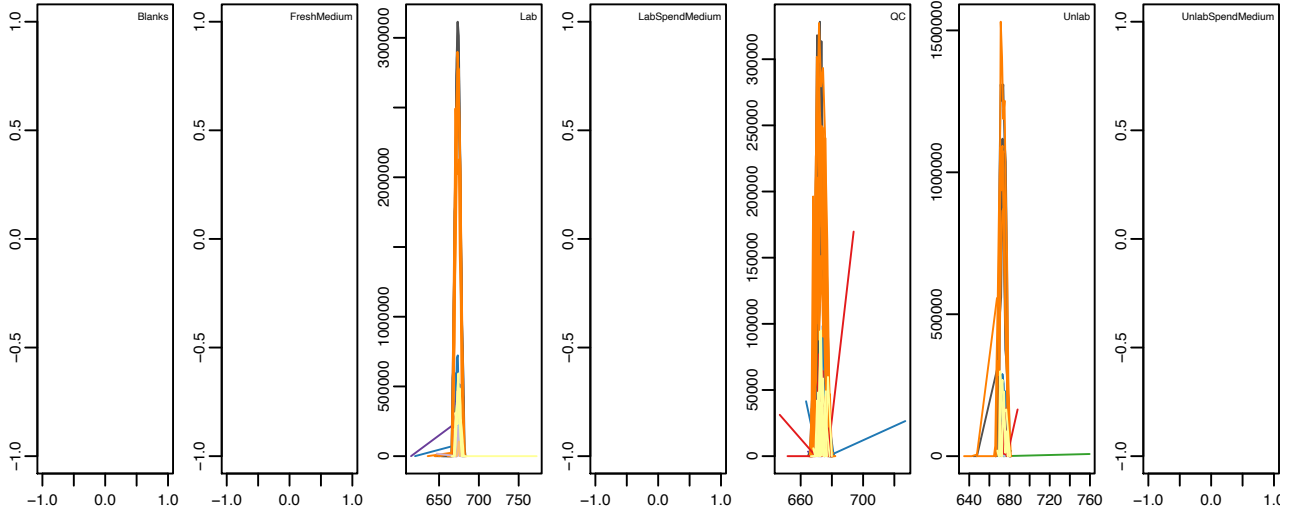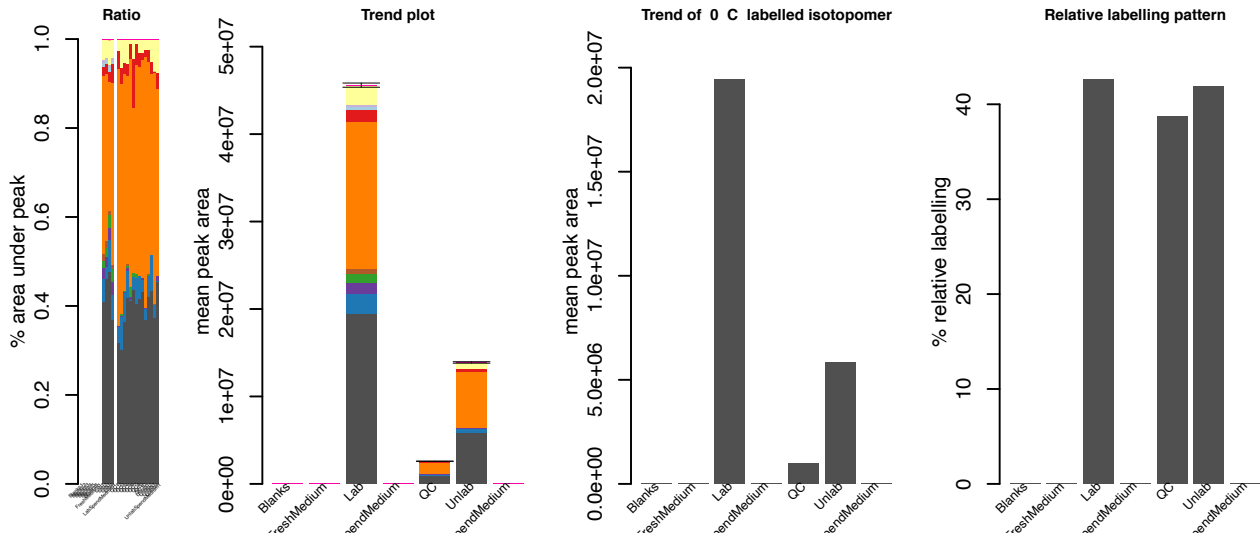

# Nicotinamide

Formula: C<sub>6</sub>H<sub>6</sub>N<sub>2</sub>O Mass: 122.048 Std.RT: 389.4 Ion: POS

# G1

■ UL ■ +1 ■ +2 ■ +3 ■ +4 ■ +5 ■ +6

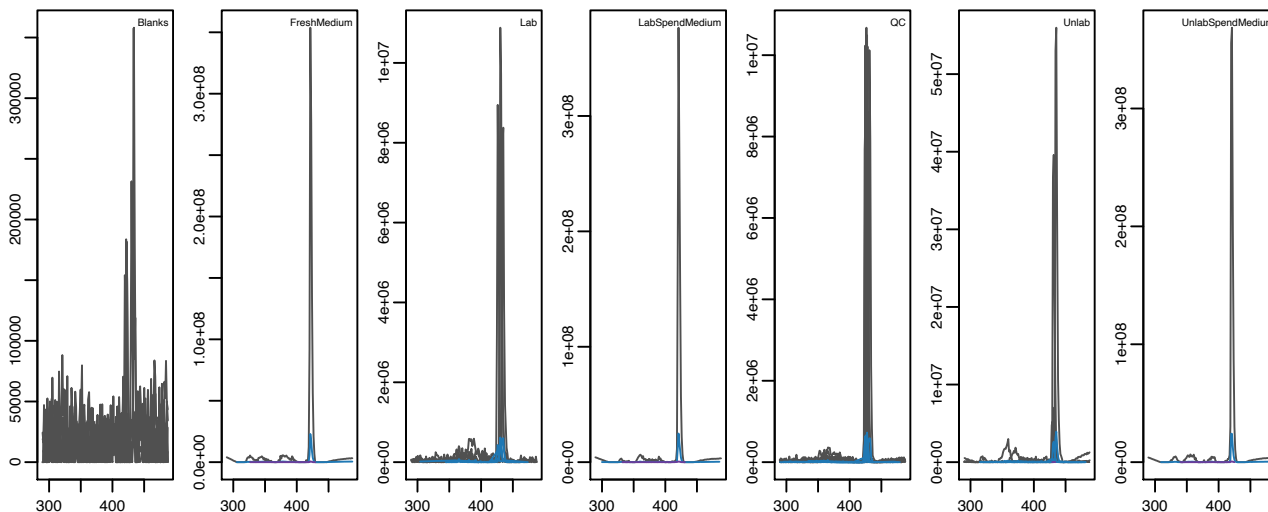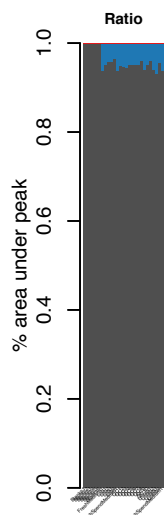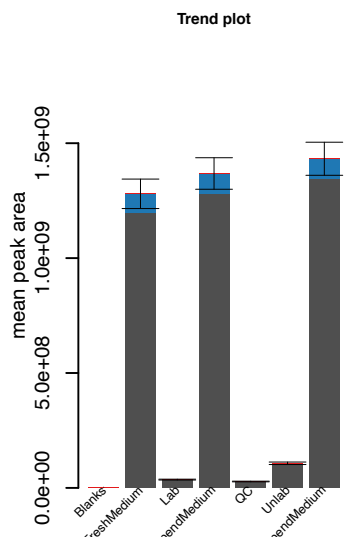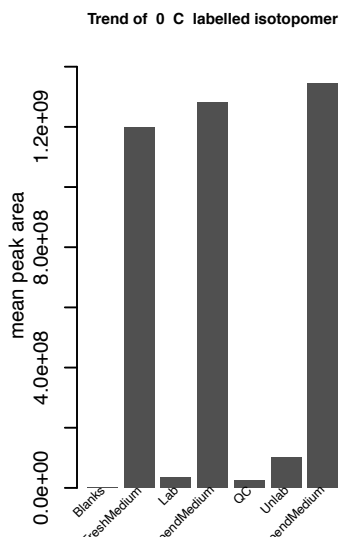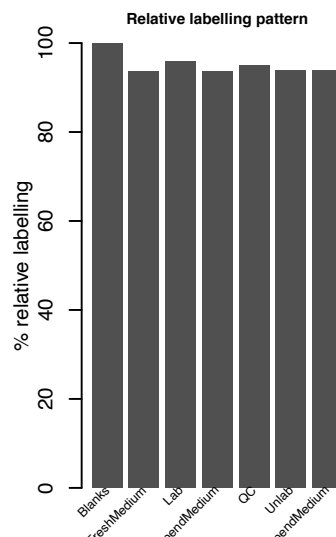

# Nicotinate

Formula: C<sub>6</sub>H<sub>5</sub>NO<sub>2</sub> Mass: 123.032 Std.RT: 435 Ion: POS

# G1

■ UL ■ +1 ■ +2 ■ +3 ■ +4 ■ +5 ■ +6

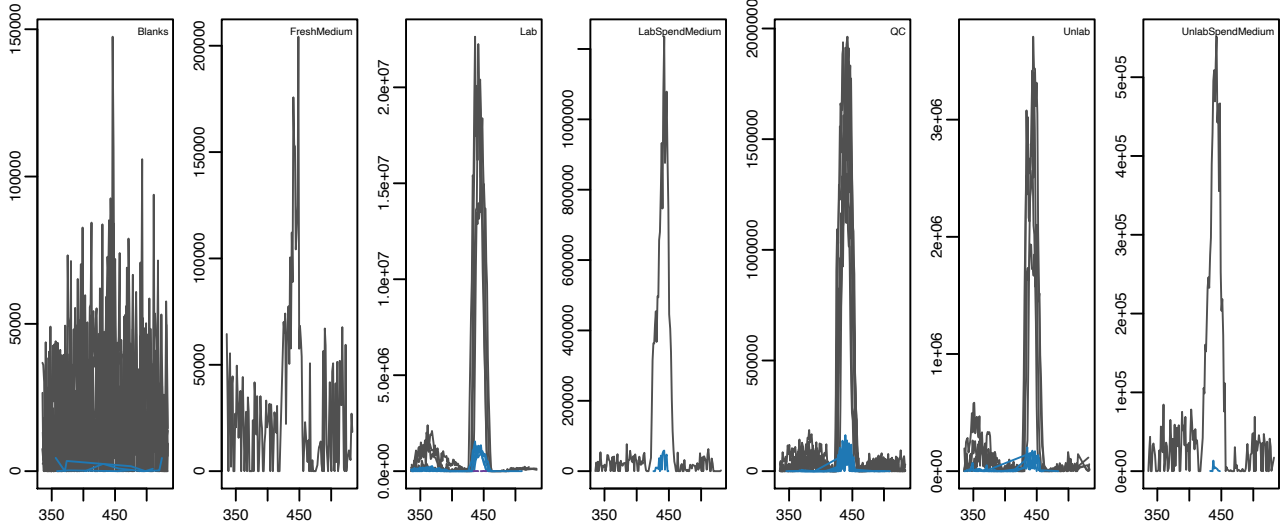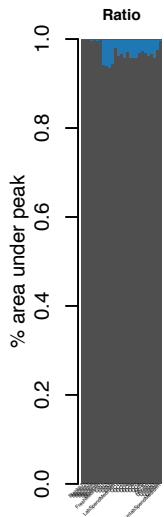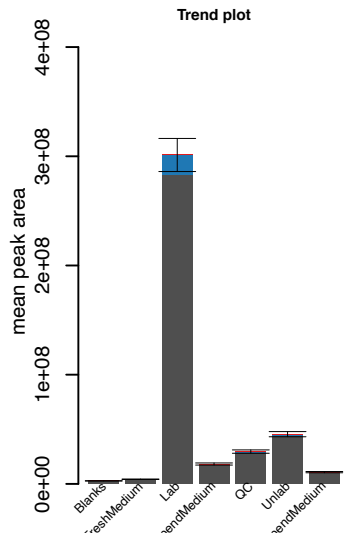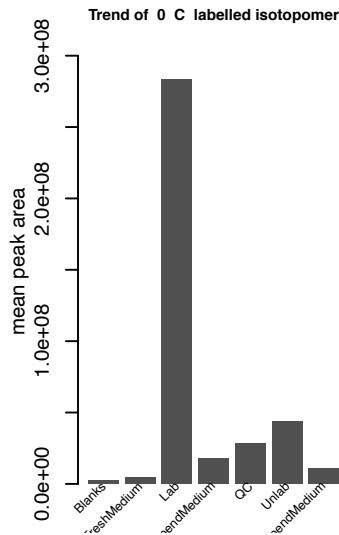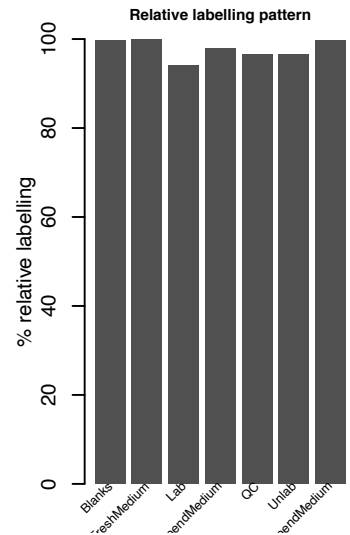

# O-Acetyl-L-serine

Formula: C<sub>5</sub>H<sub>9</sub>NO<sub>4</sub> Mass: 147.053 Std.RT: 701.4 Ion: POS

# G1

■ UL ■ +1 ■ +2 ■ +3 ■ +4 ■ +5

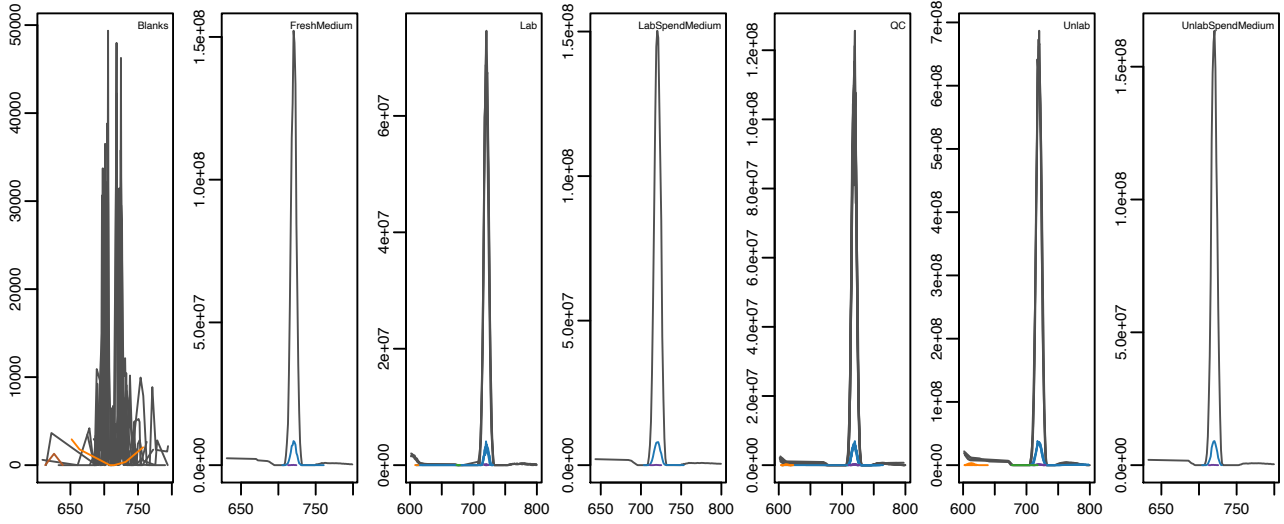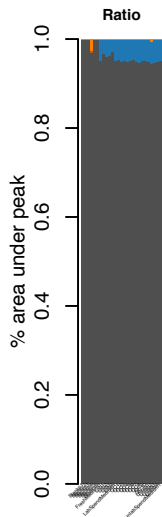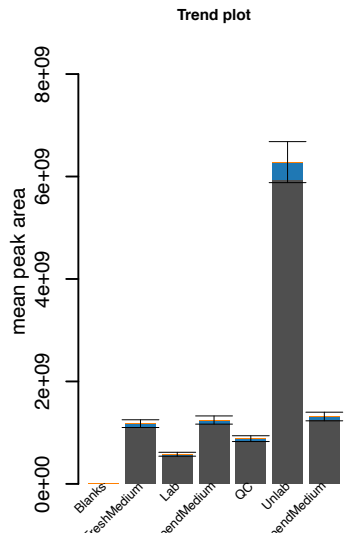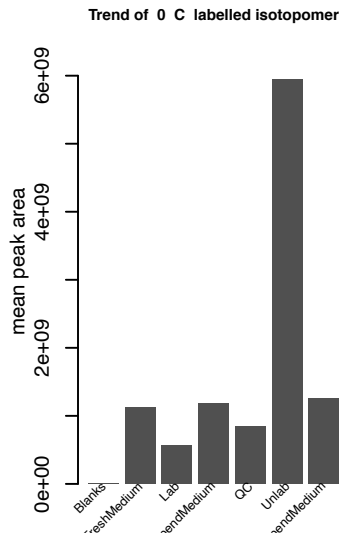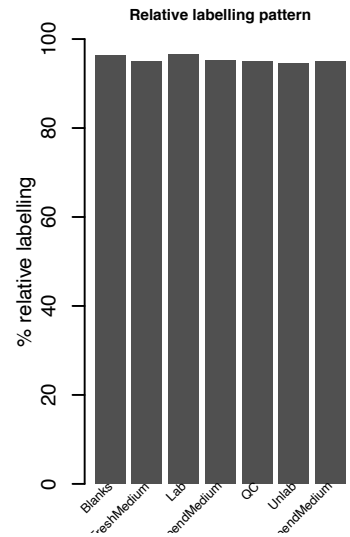

# O-Acetylcarnitine

Formula: C<sub>9</sub>H<sub>17</sub>NO<sub>4</sub> Mass: 203.116 Std.RT: 573.6 Ion: POS

# G1

■UL ■+1 ■+2 ■+3 ■+4 ■+5 ■+6 ■+7 ■+8 ■+9

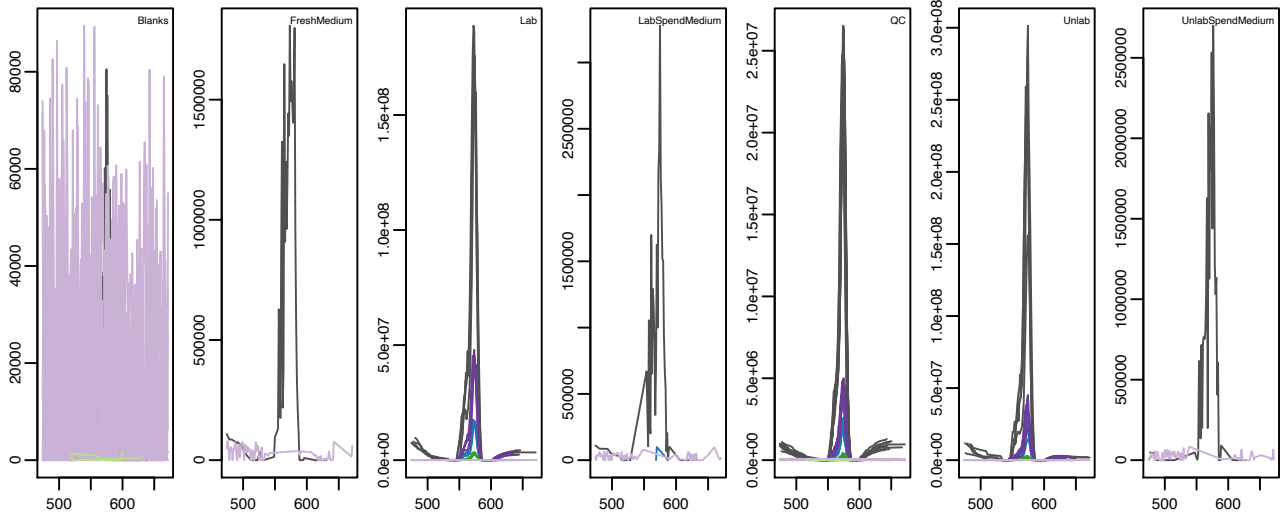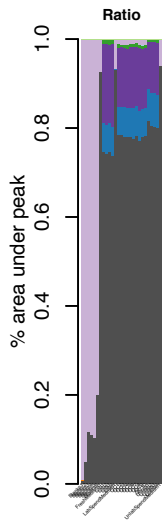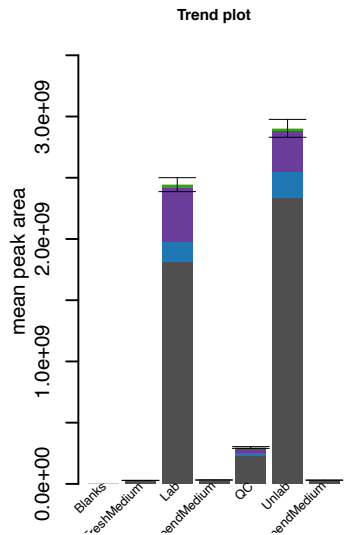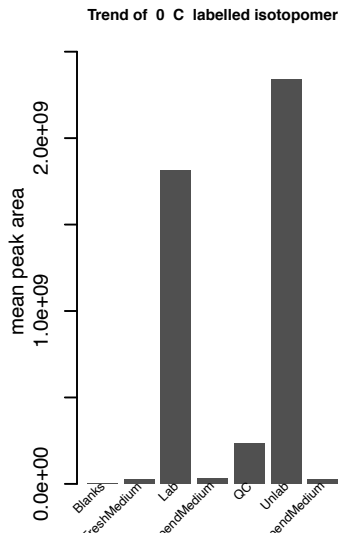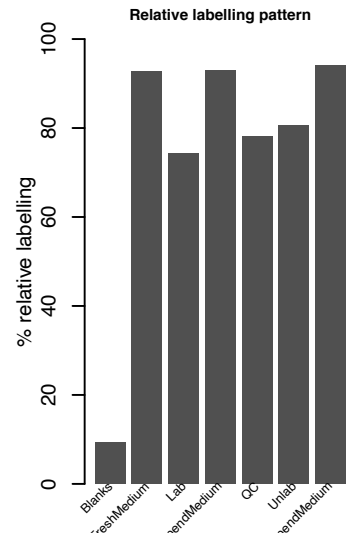

# Pantothenate

Formula: C<sub>9</sub>H<sub>17</sub>NO<sub>5</sub> Mass: 219.111 Std.RT: 487.2 Ion: POS

# G1

■ UL ■+1 ■+2 ■+3 ■+4 ■+5 ■+6 ■+7 ■+8 ■+9

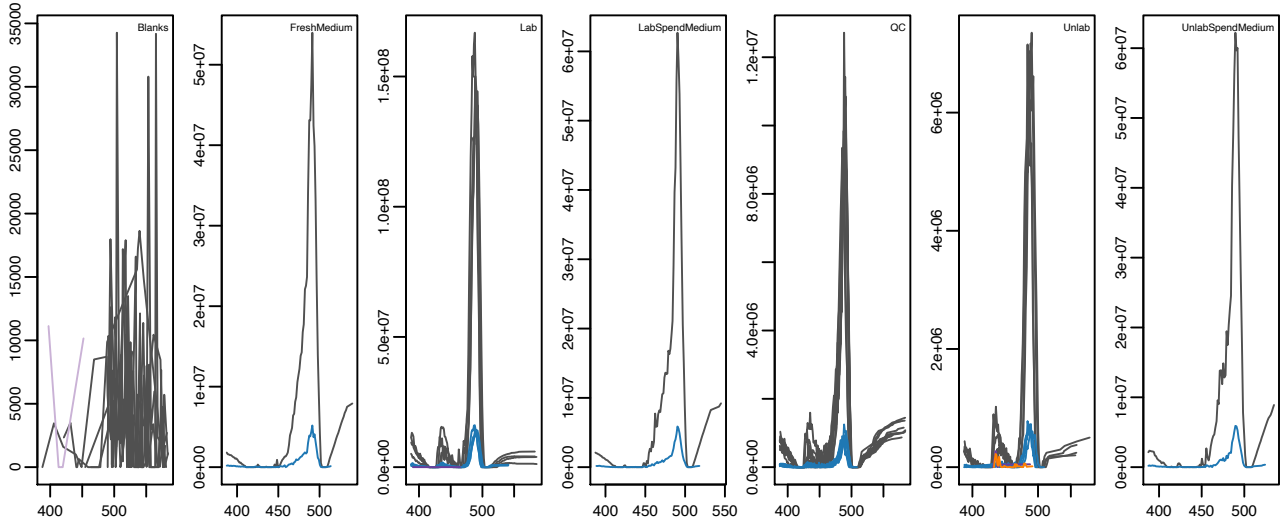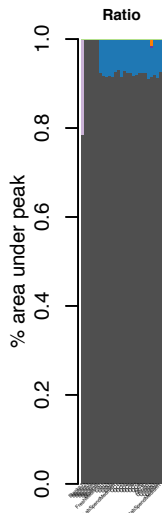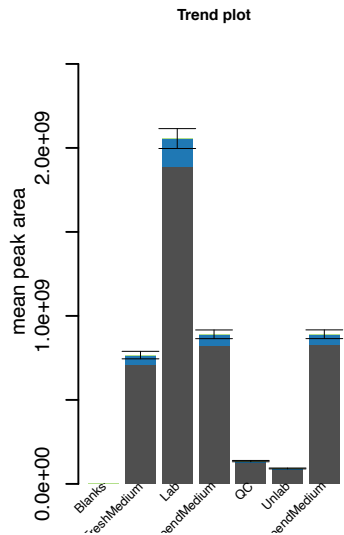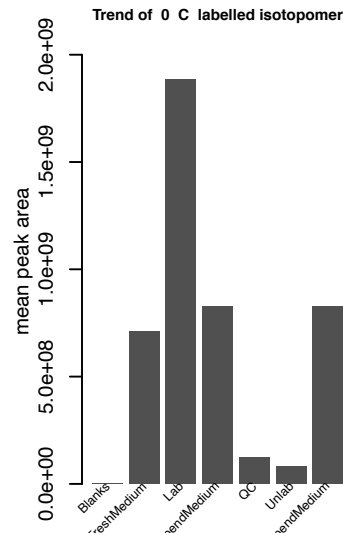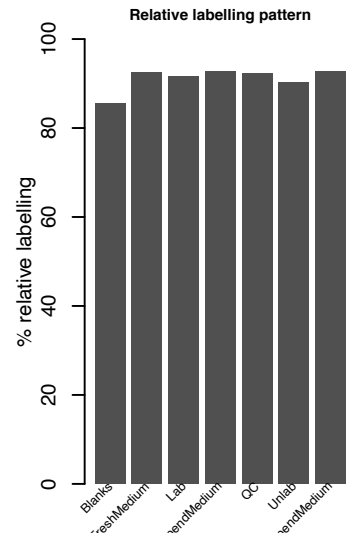

# Picolinic acid

Formula: C<sub>6</sub>H<sub>5</sub>NO<sub>2</sub> Mass: 123.032 Std.RT: 508.2 Ion: POS

# G1

■ UL ■ +1 ■ +2 ■ +3 ■ +4 ■ +5 ■ +6

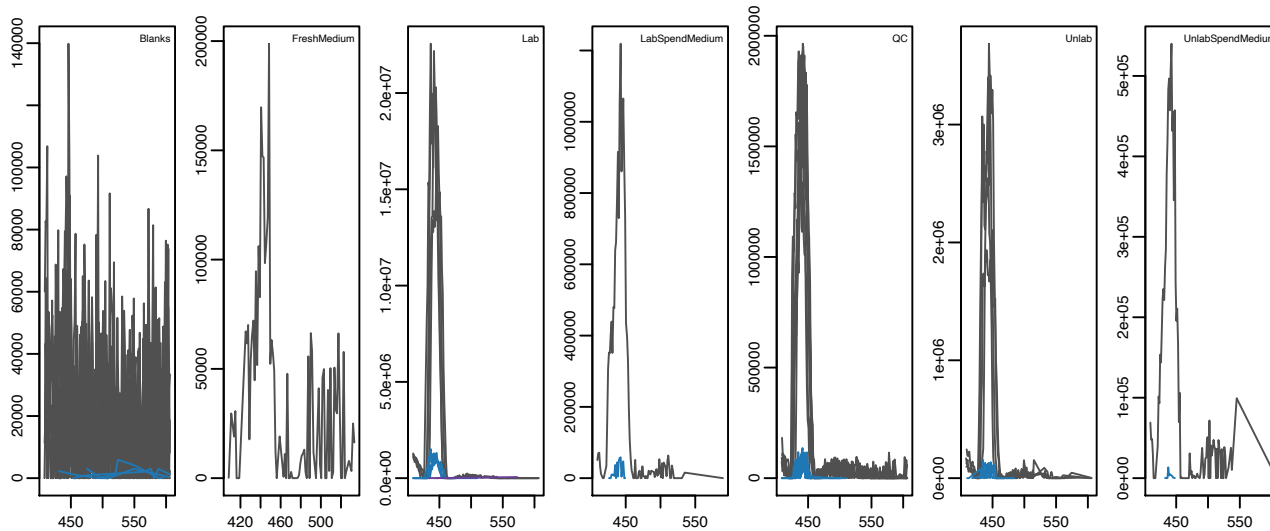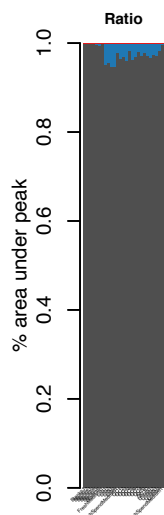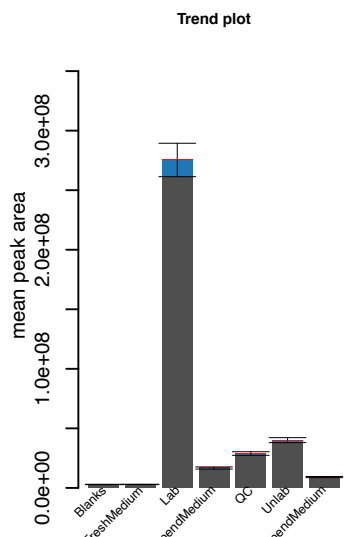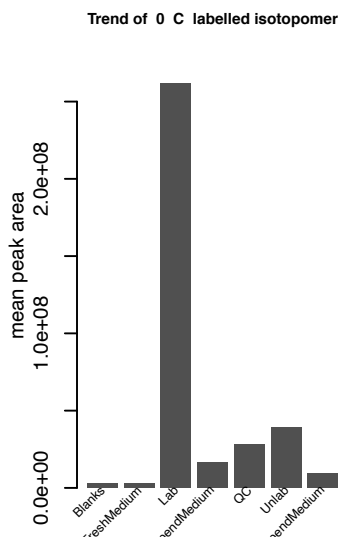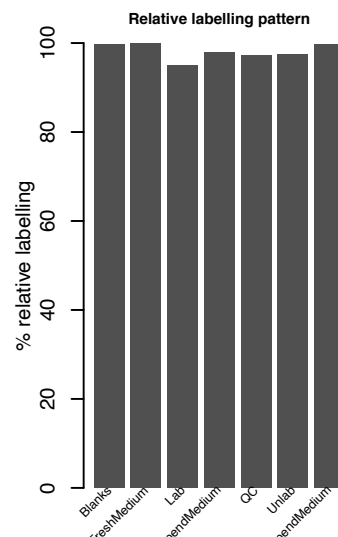

# Pyridoxal

Formula: C<sub>8</sub>H<sub>9</sub>NO<sub>3</sub> Mass: 167.058 Std.RT: 454.8 Ion: POS

# G1

■ UL ■ +1 ■ +2 ■ +3 ■ +4 ■ +5 ■ +6 ■ +7 ■ +8

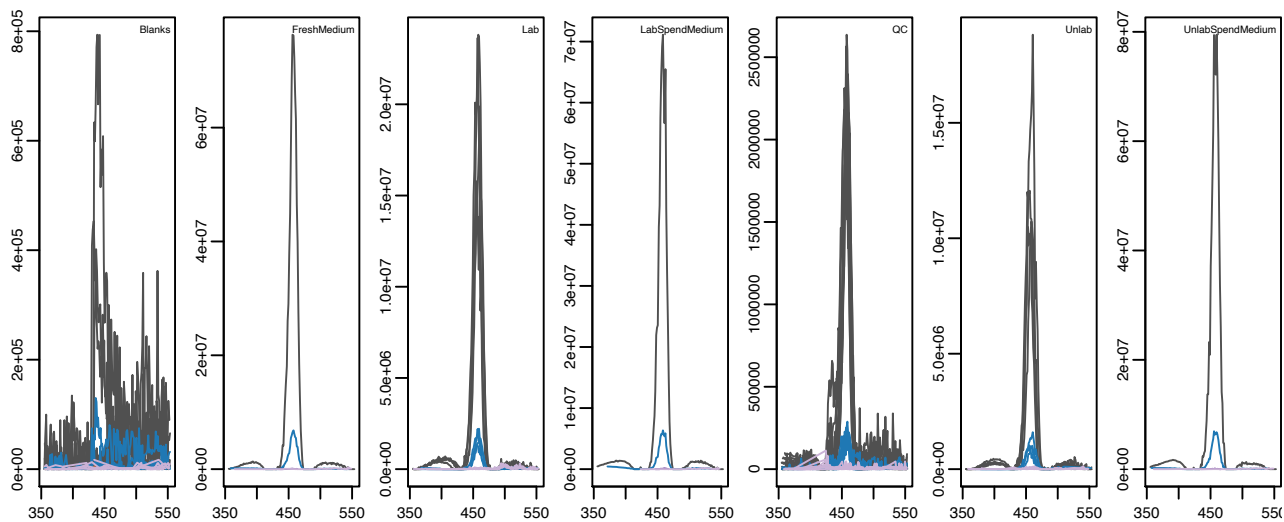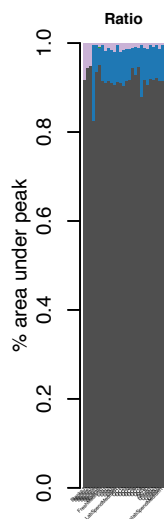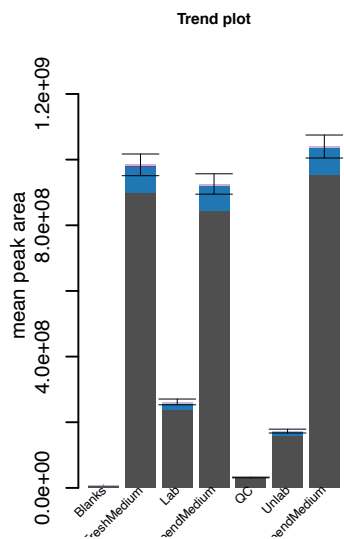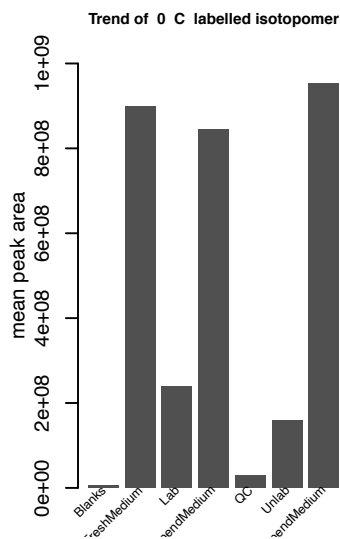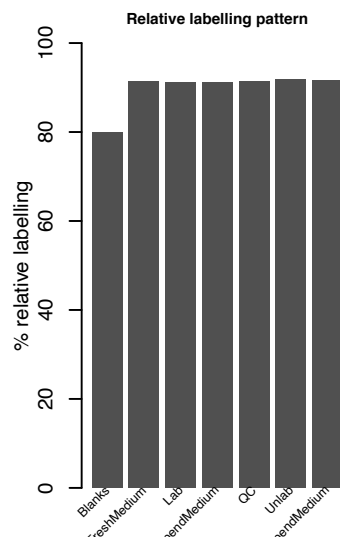



# UMP

Formula: C<sub>9</sub>H<sub>13</sub>N<sub>2</sub>O<sub>9</sub>P Mass: 324.036 Std.RT: 694.8 Ion: POS

# G1

■ UL ■ +1 ■ +2 ■ +3 ■ +4 ■ +5 ■ +6 ■ +7 ■ +8 ■ +9

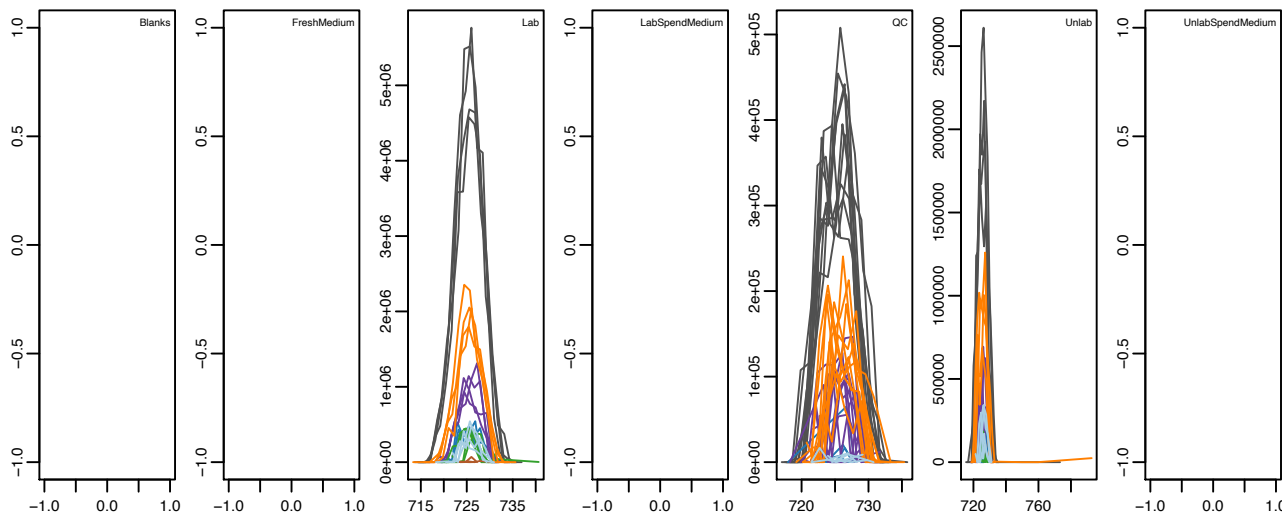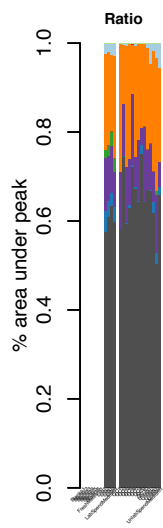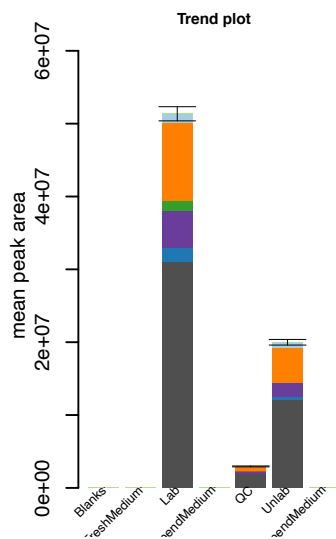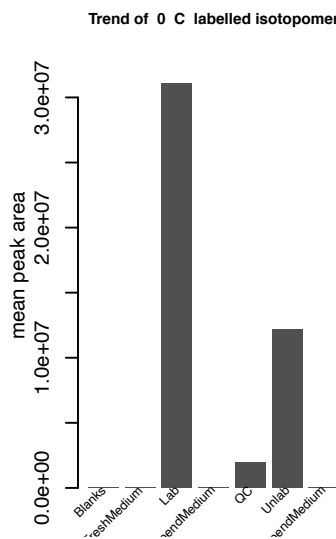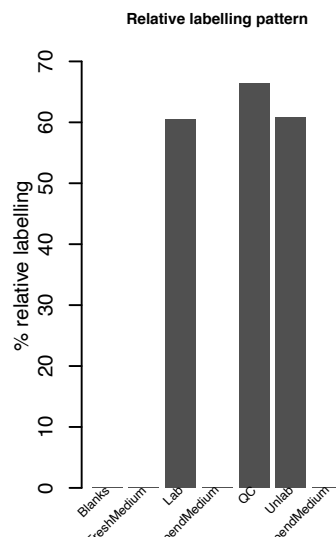

# Uracil

Formula: C<sub>4</sub>H<sub>4</sub>N<sub>2</sub>O<sub>2</sub> Mass: 112.027 Std.RT: 483.6 Ion: POS

# G1

■ UL ■ +1 ■ +2 ■ +3 ■ +4

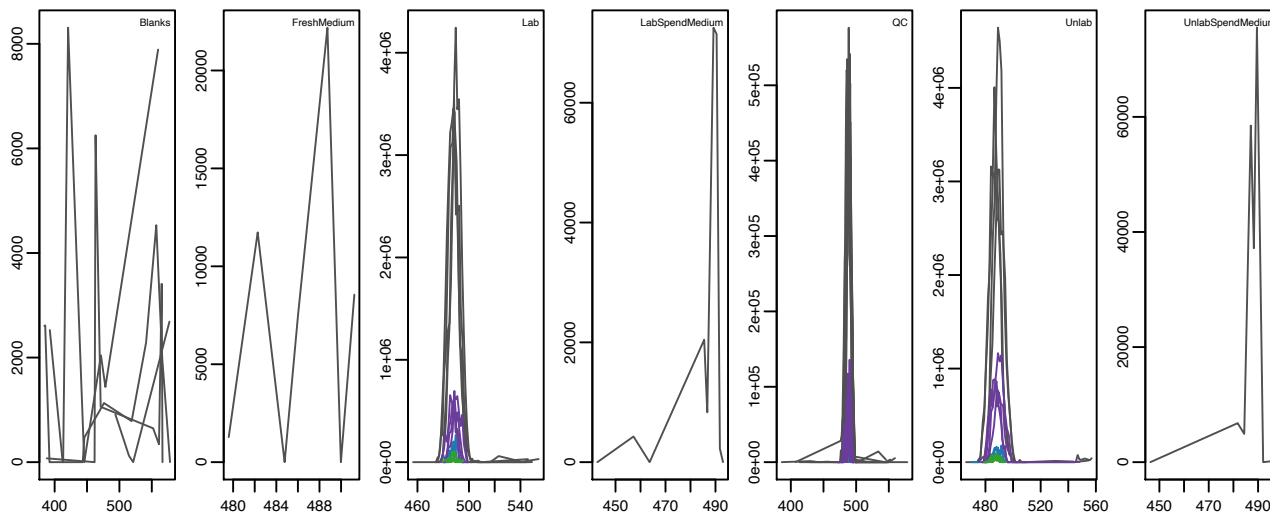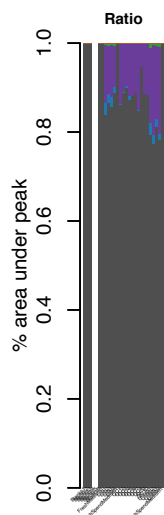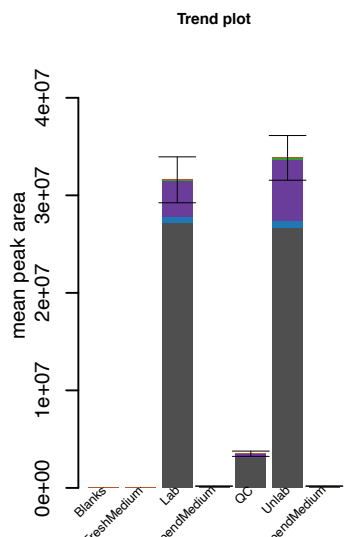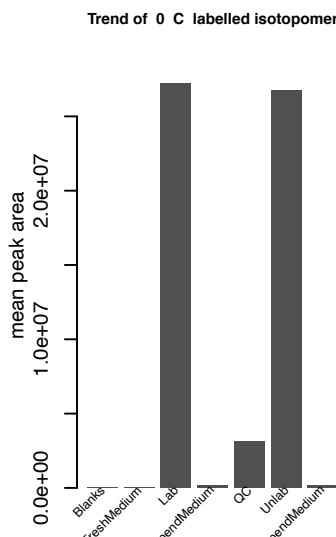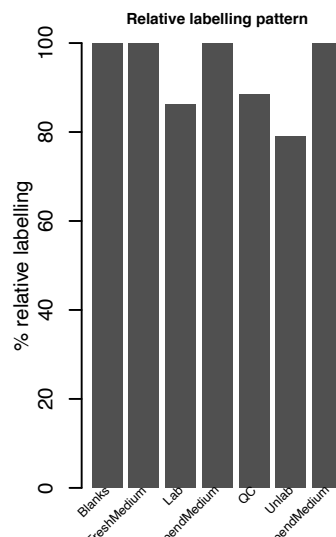

# cytosine

Formula: C<sub>4</sub>H<sub>5</sub>N<sub>3</sub>O Mass: 111.043 Std.RT: 612.6 Ion: POS

# G1

■ UL ■ +1 ■ +2 ■ +3 ■ +4

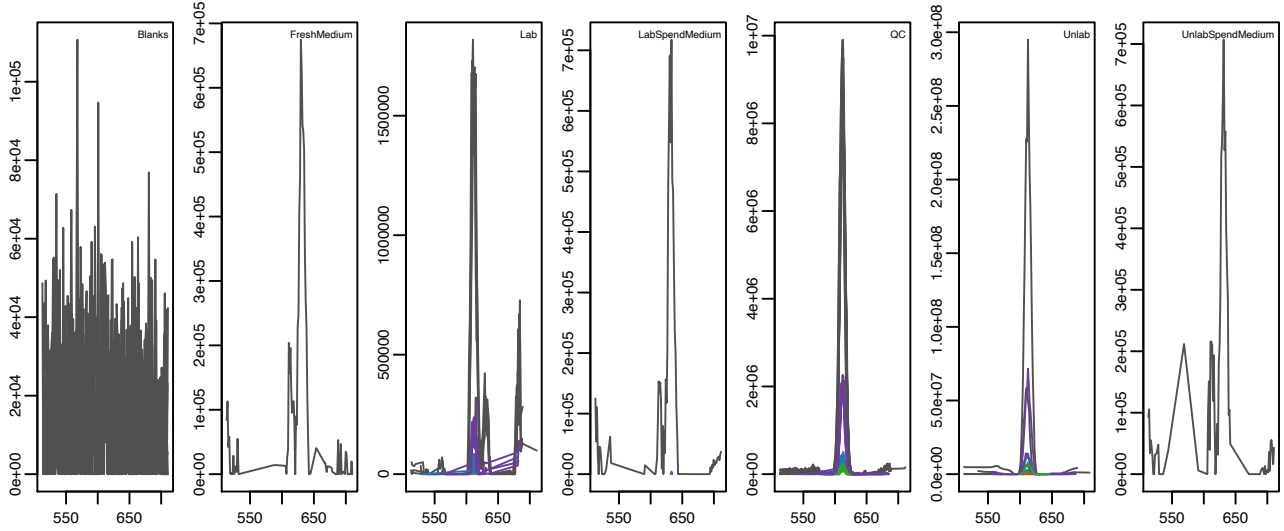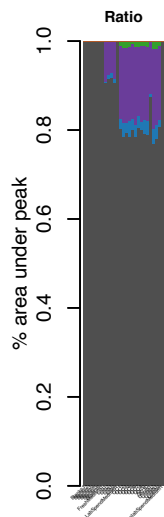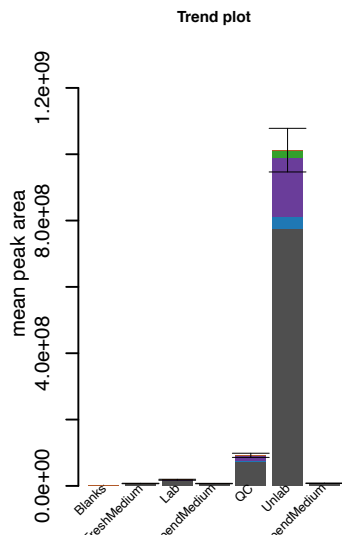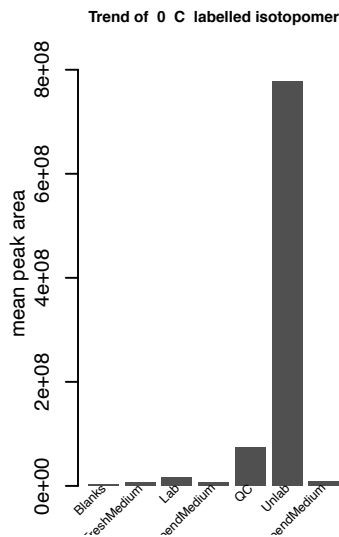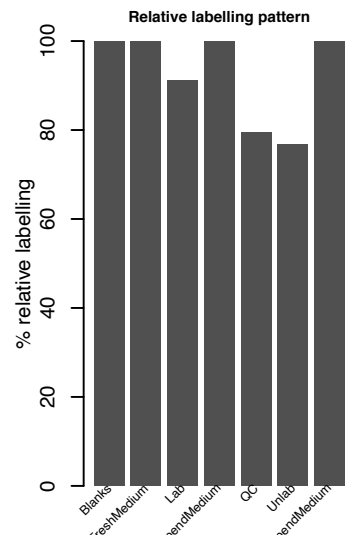

# dAMP

Formula: C<sub>10</sub>H<sub>14</sub>N<sub>5</sub>O<sub>6</sub>P Mass: 331.068 Std.RT: 632.4 Ion: POS

# G1

■UL ■+1 ■+2 ■+3 ■+4 ■+5 ■+6 ■+7 ■+8 ■+9 ■+10

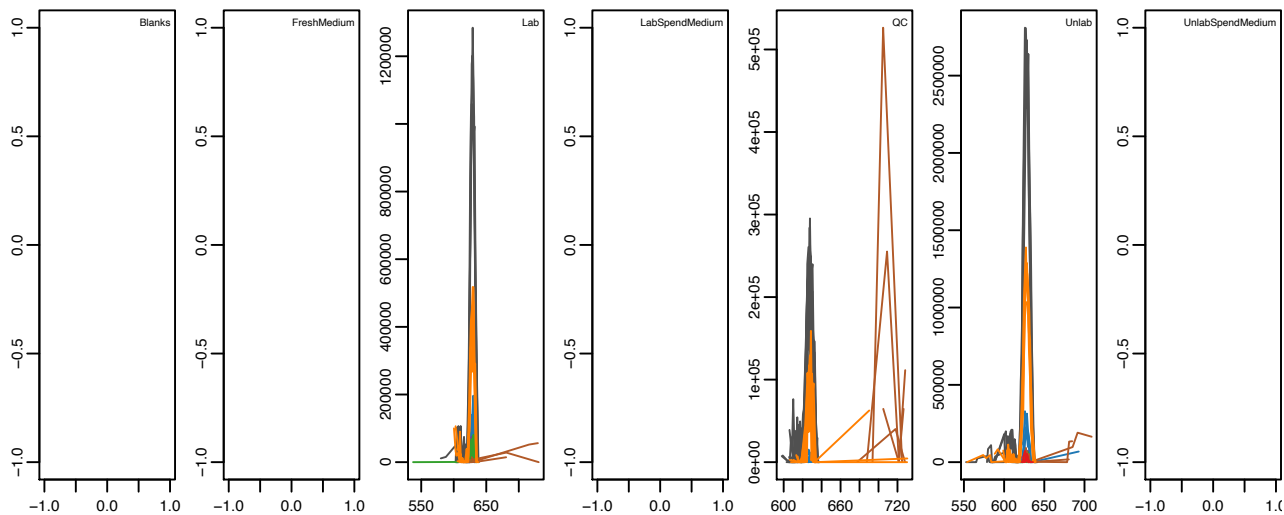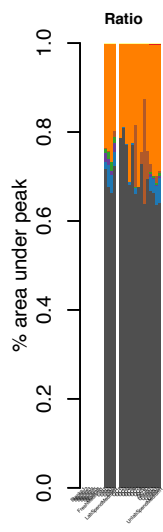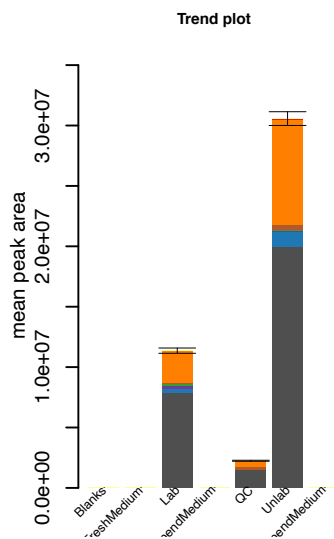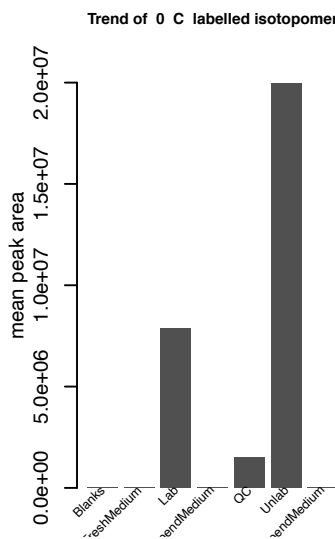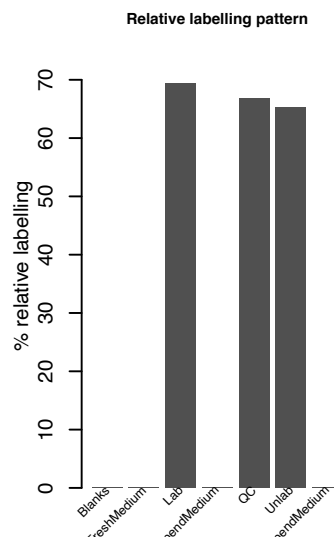

# sn-Glycerol 3-phosphate

Formula: C3H9O6P Mass: 172.014 Std.RT: 720.6 Ion: POS

# G1

■ UL ■ +1 ■ +2 ■ +3

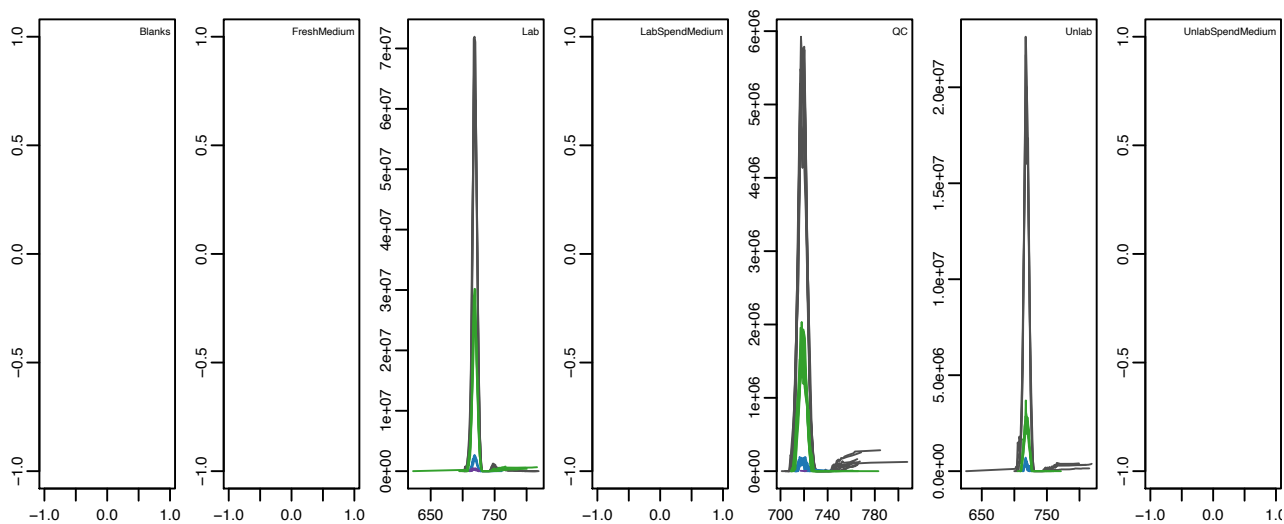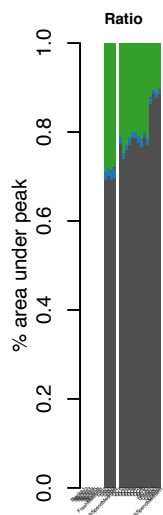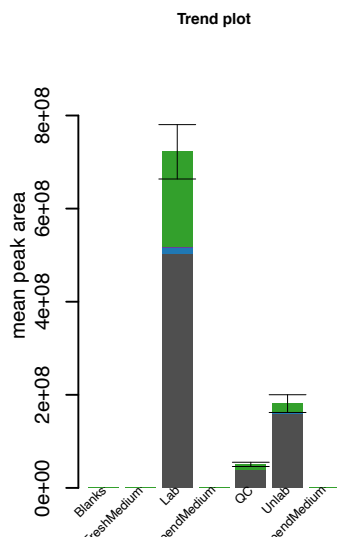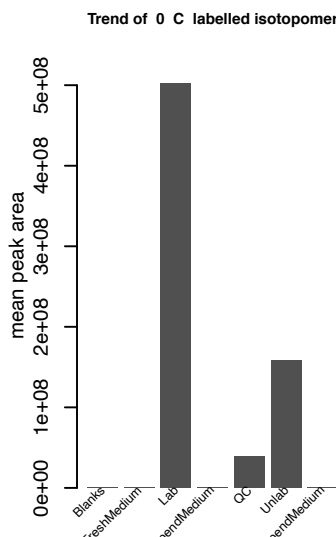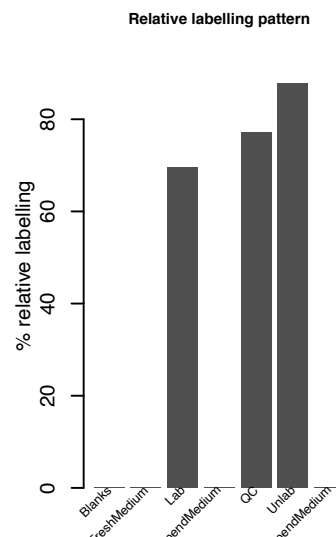

# sn-glycero-3-Phosphocholine

Formula: C<sub>8</sub>H<sub>20</sub>NO<sub>6</sub>P Mass: 257.103 Std.RT: 700.8 Ion: POS

# G1

■ UL ■+1 ■+2 ■+3 ■+4 ■+5 ■+6 ■+7 ■+8

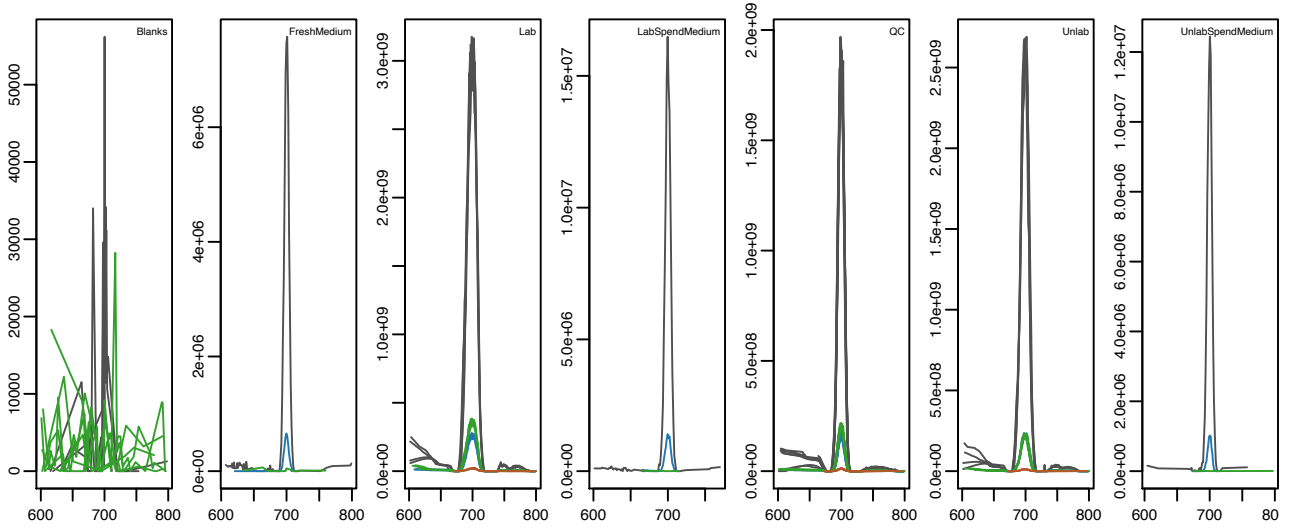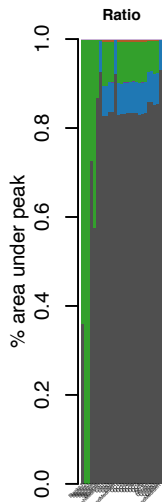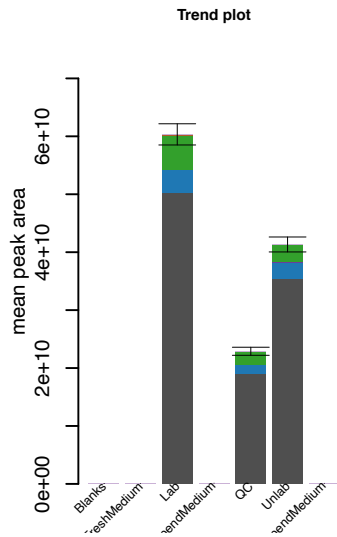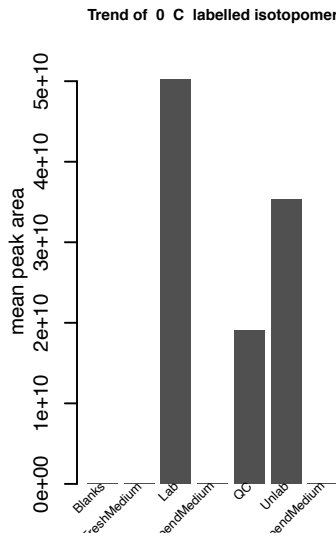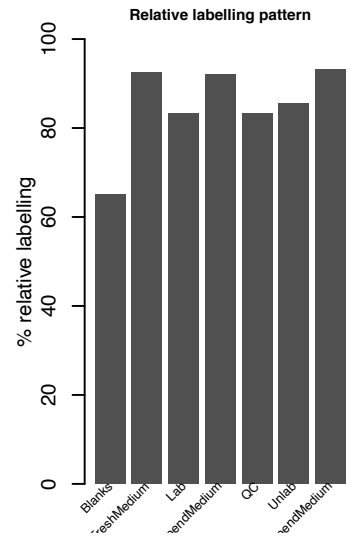

# thymine

Formula: C<sub>5</sub>H<sub>6</sub>N<sub>2</sub>O<sub>2</sub> Mass: 126.043 Std.RT: 418.2 Ion: POS

# G1

■ UL ■ +1 ■ +2 ■ +3 ■ +4 ■ +5

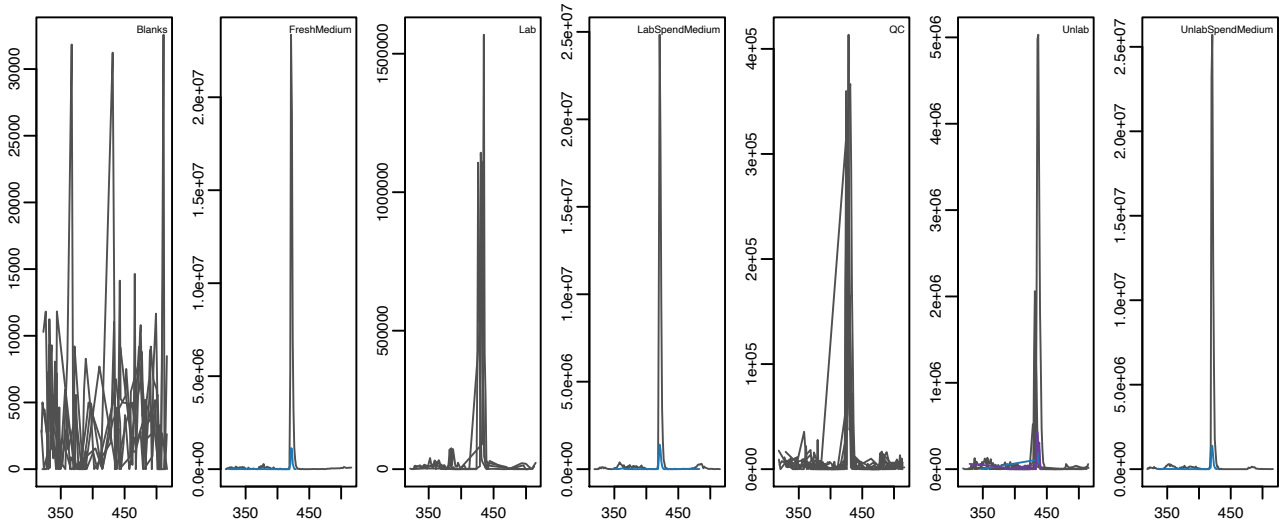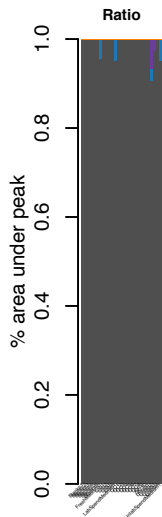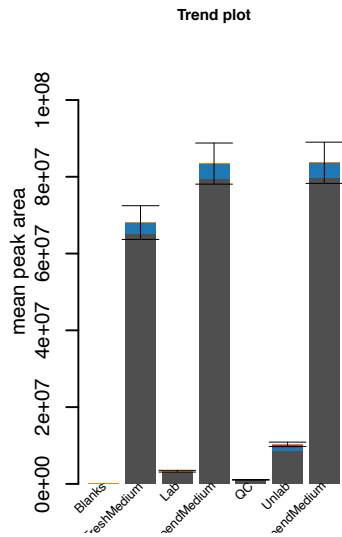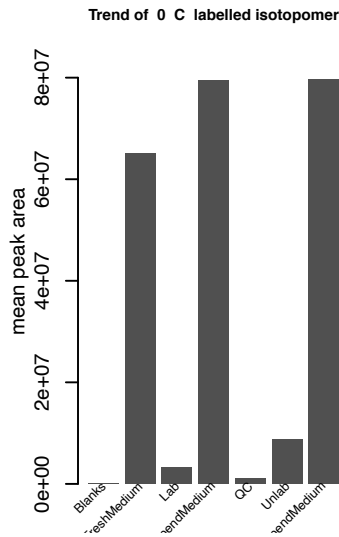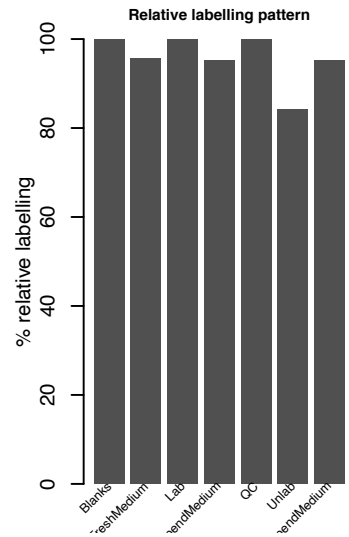

# trans-4-Hydroxy-L-proline

Formula: C<sub>5</sub>H<sub>9</sub>NO<sub>3</sub> Mass: 131.058 Std.RT: 720.6 Ion: POS

# G1

■ UL ■ +1 ■ +2 ■ +3 ■ +4 ■ +5

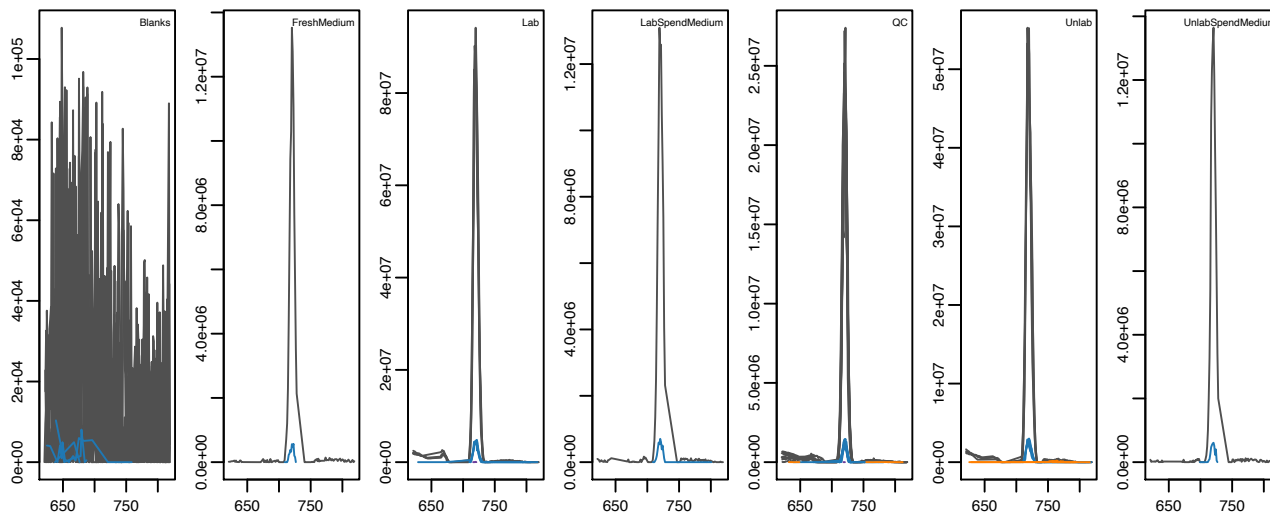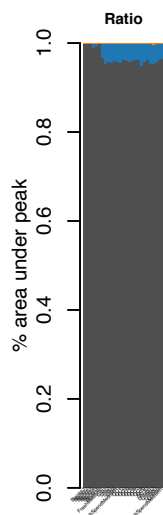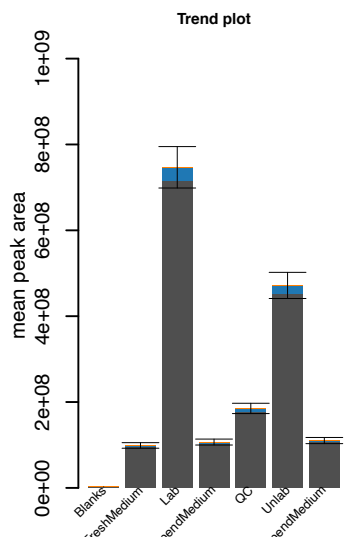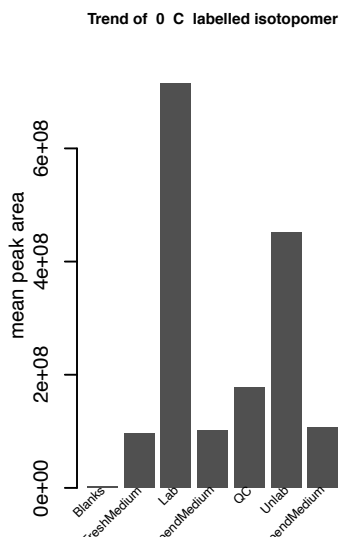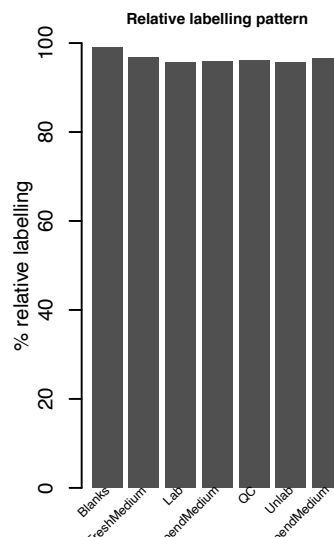



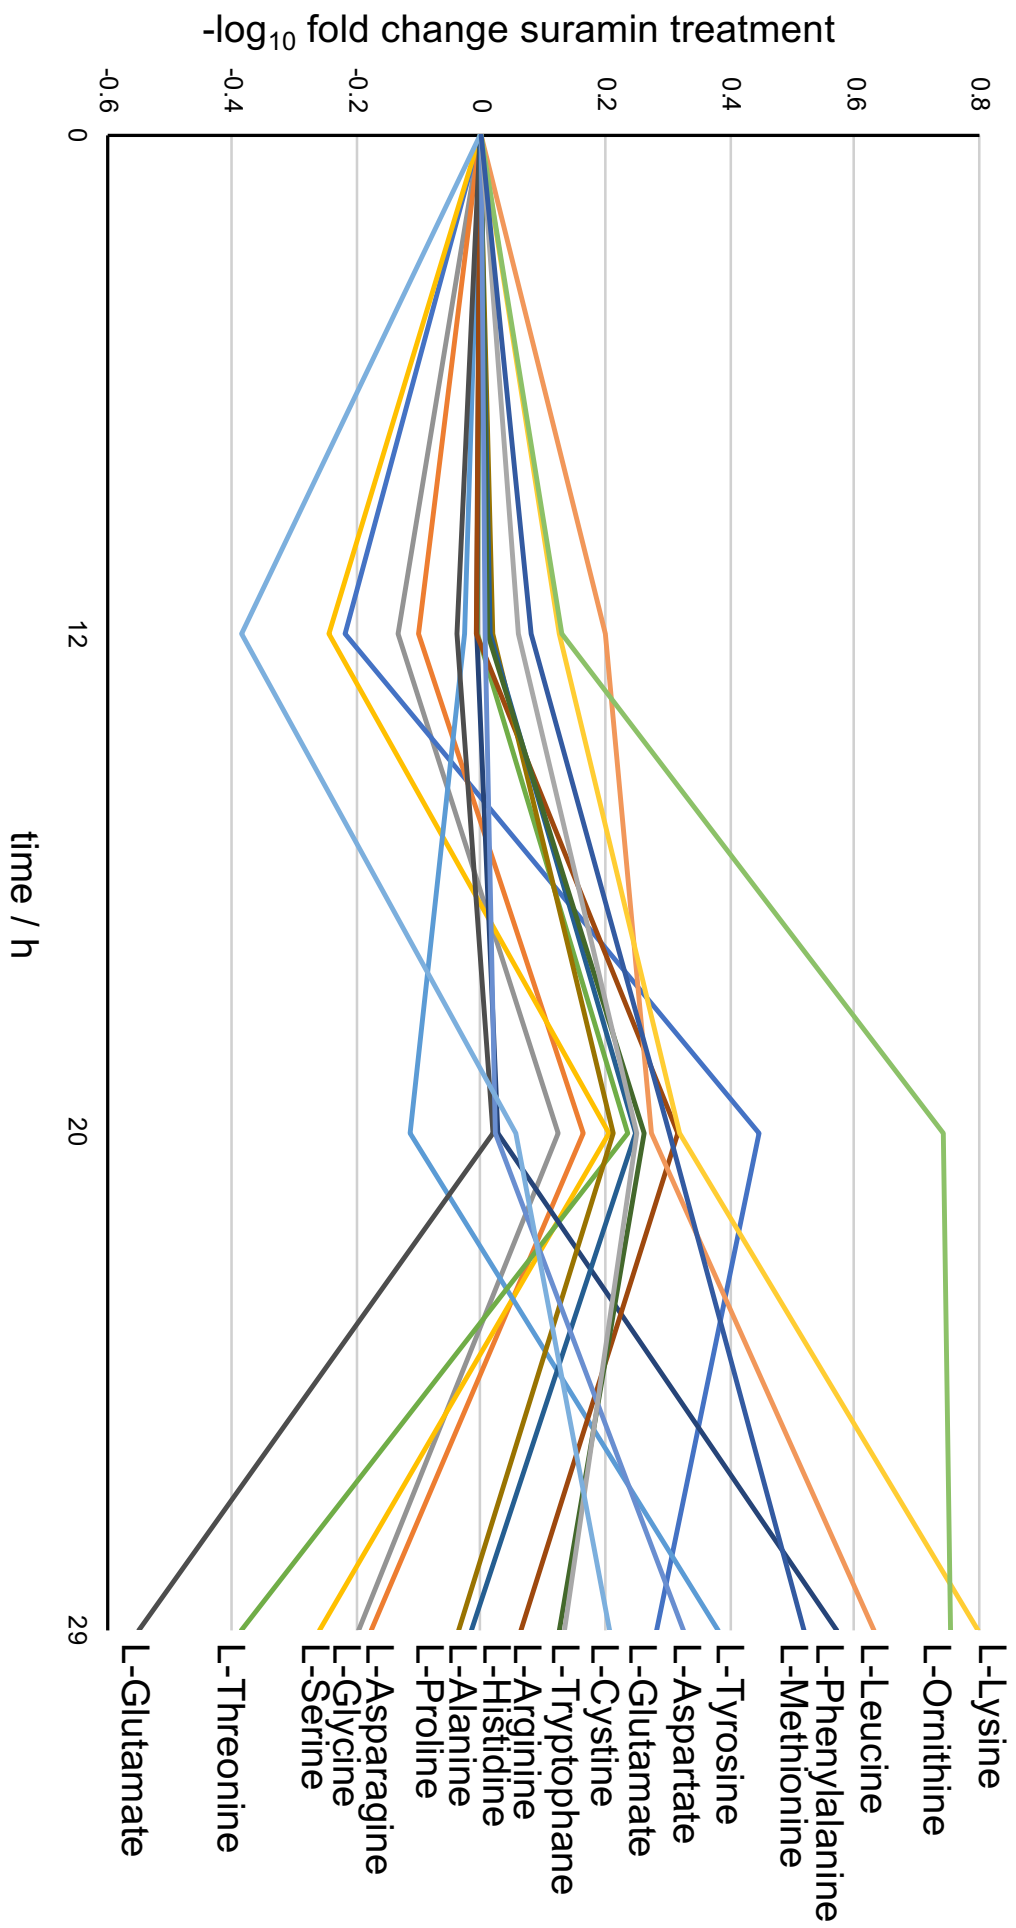

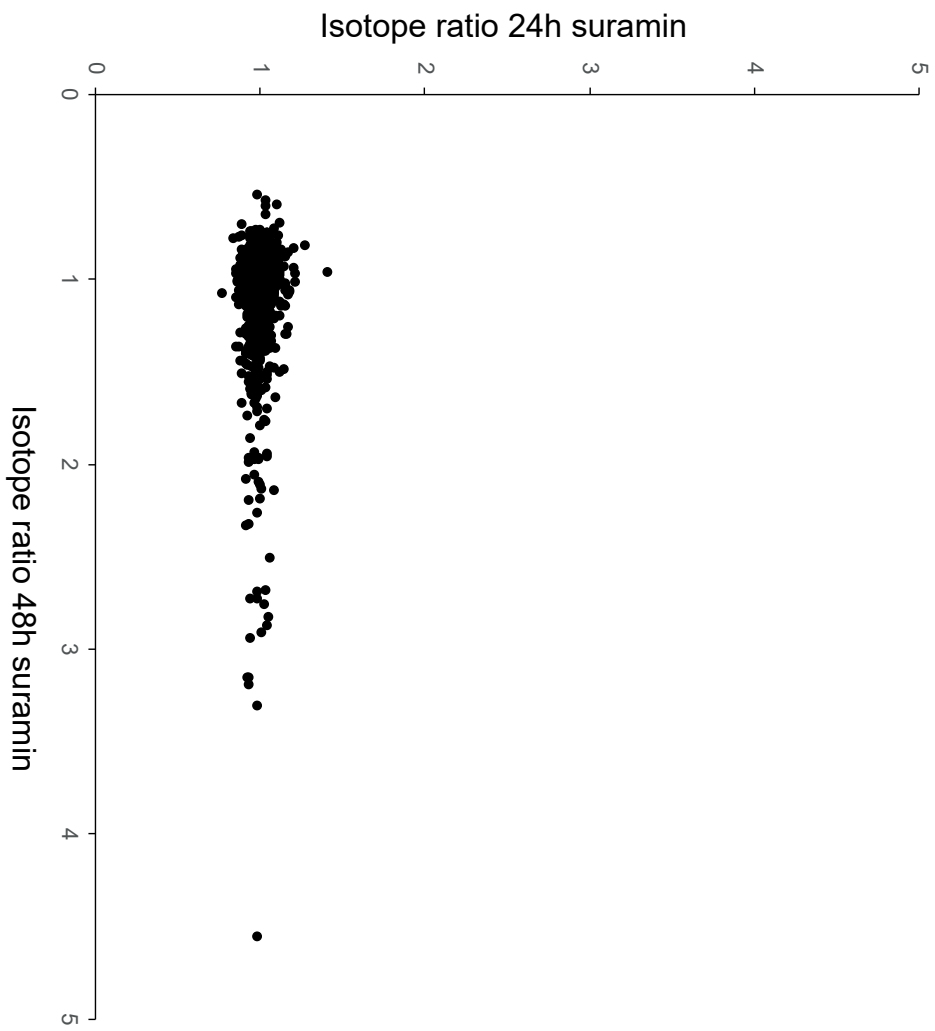

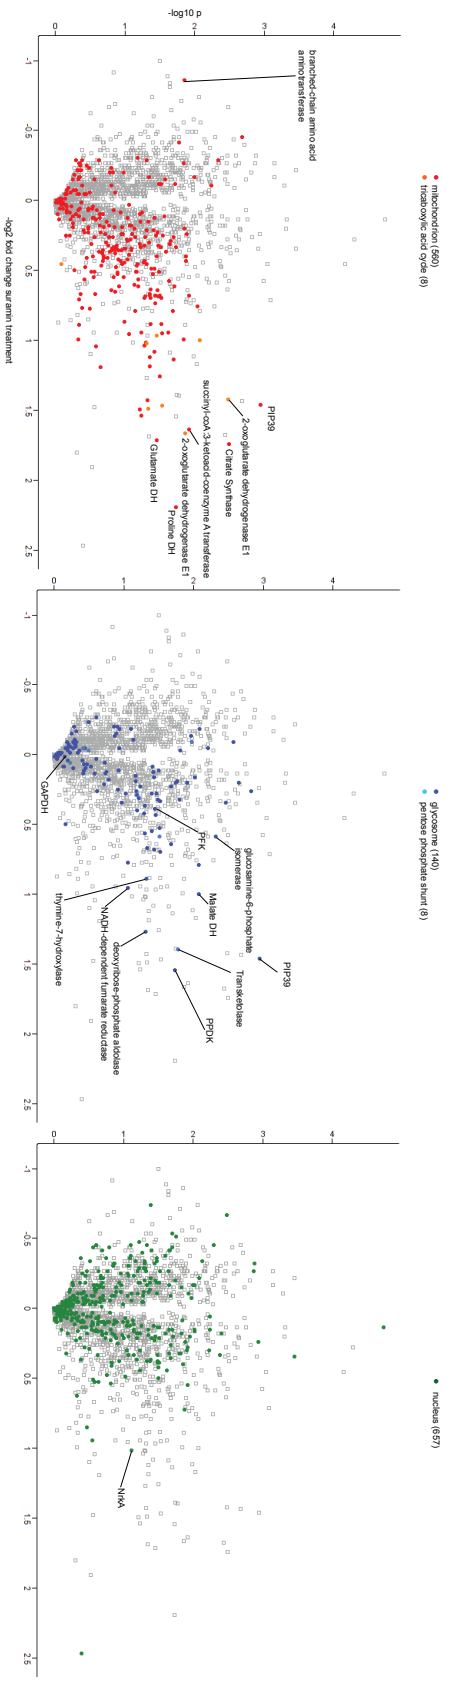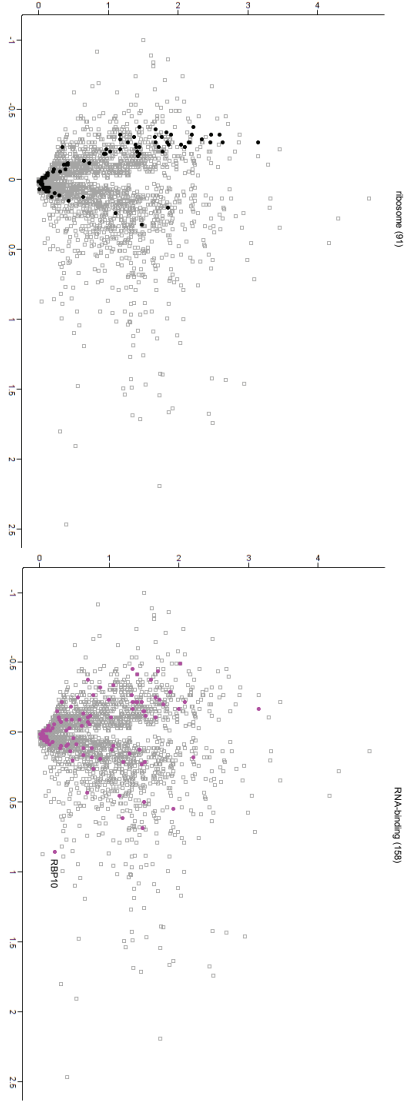

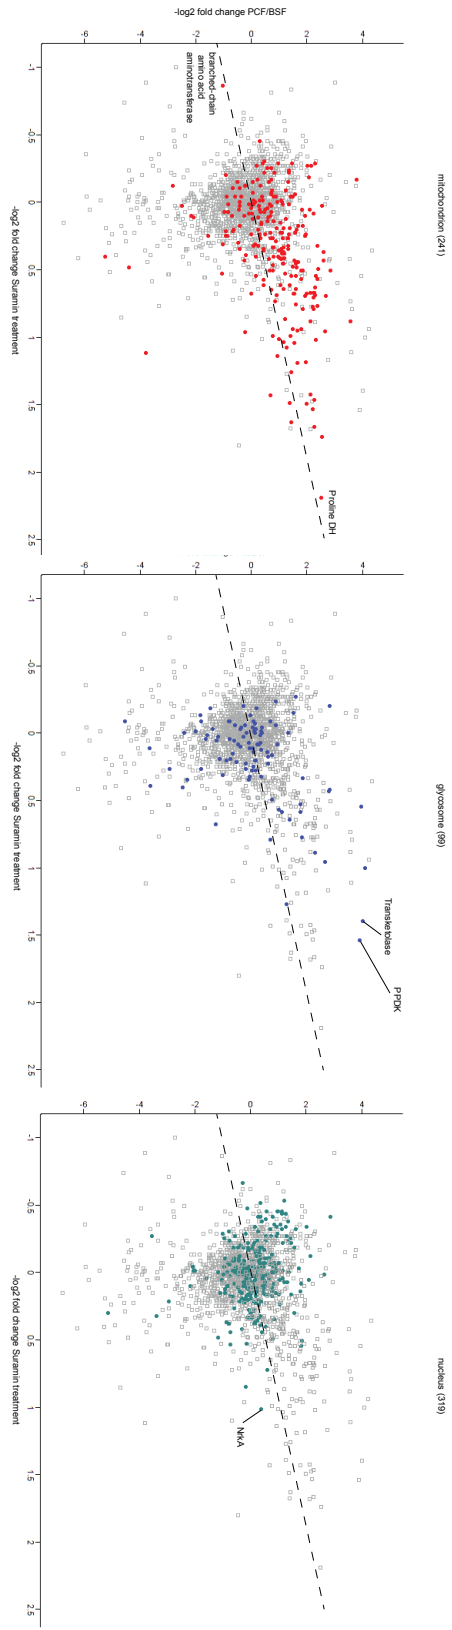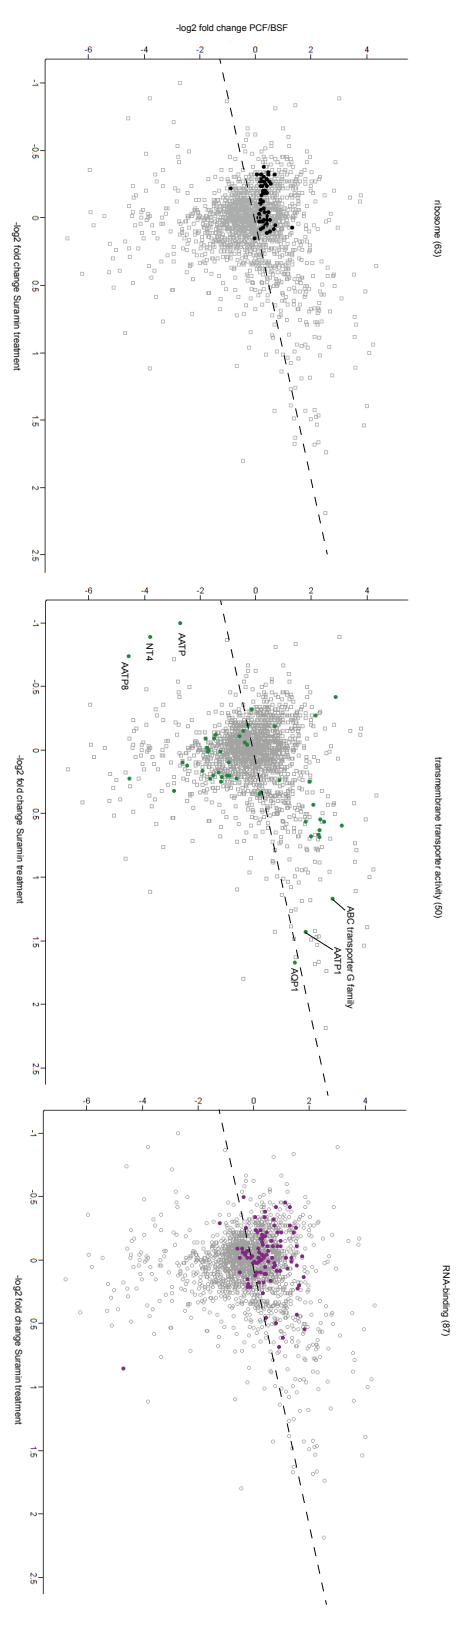

Relative absorbance  $A_{280}$

100

200

0

0.2

0.4

0.6

0.8

1.0

0

Column volume

Relative CPM

5000

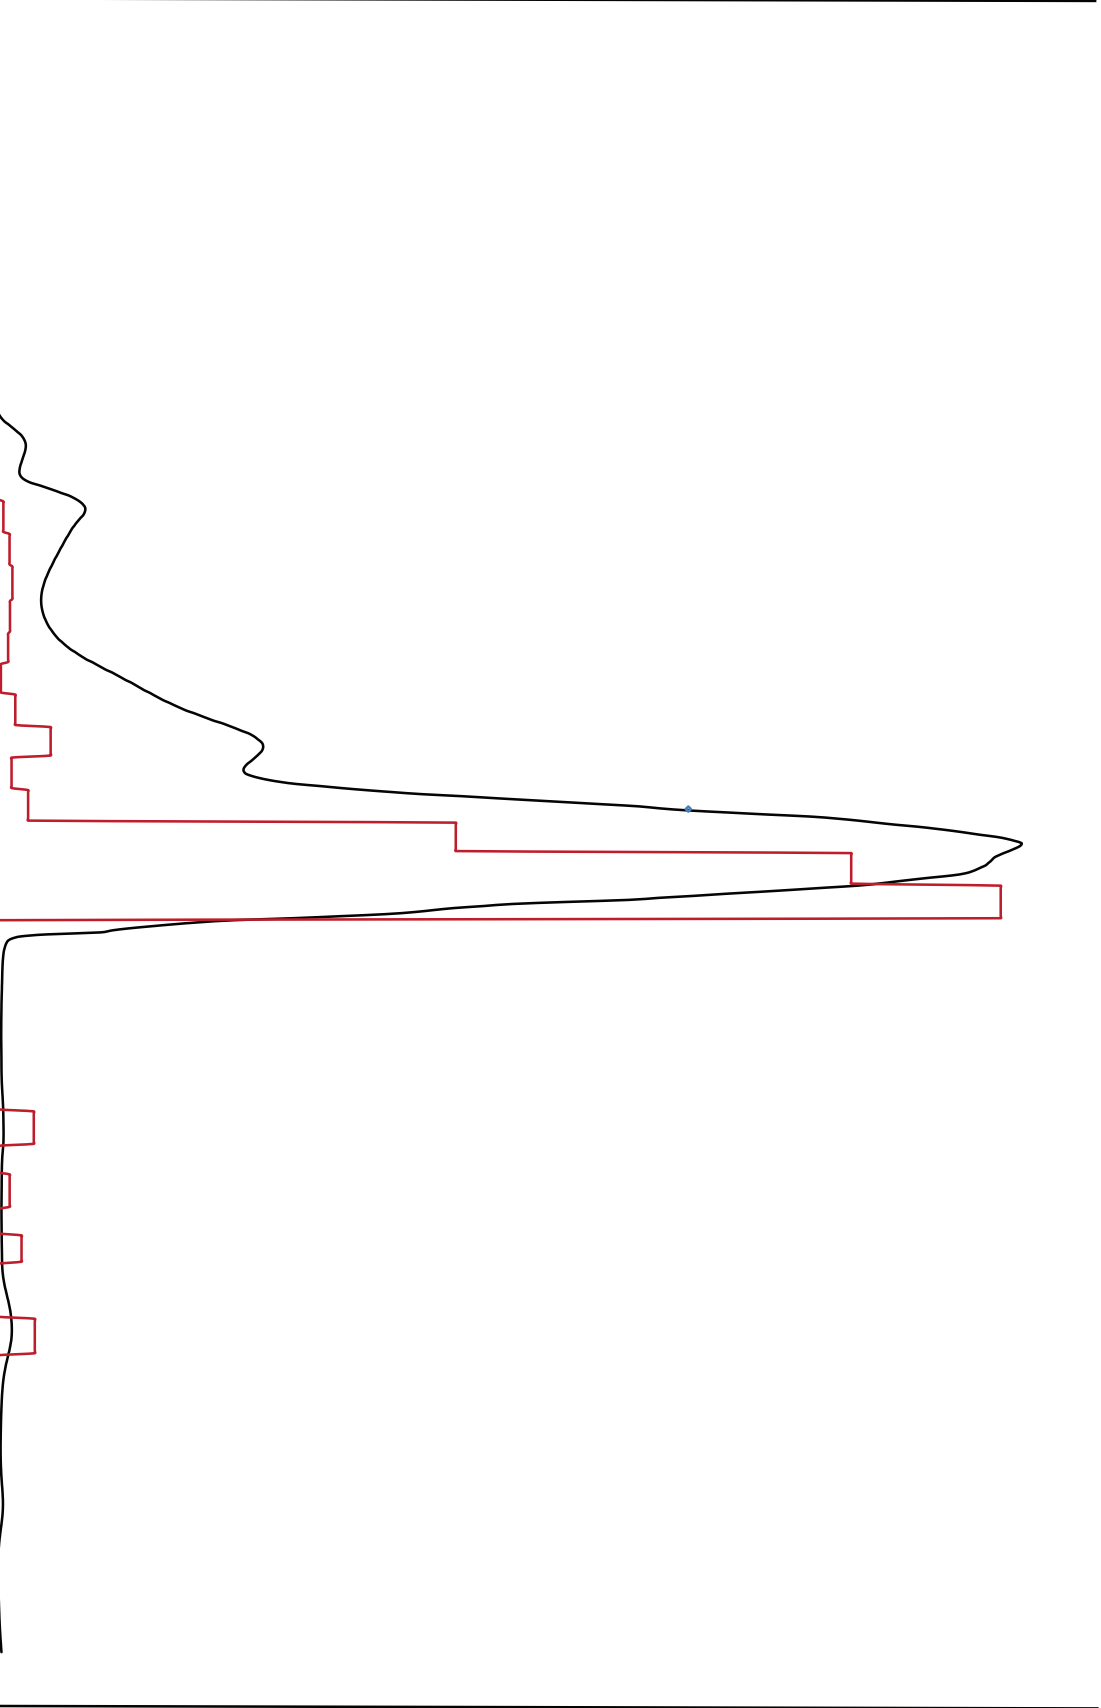

# A

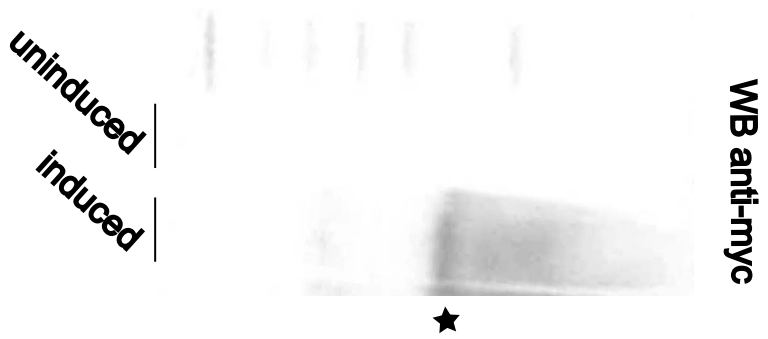

# B

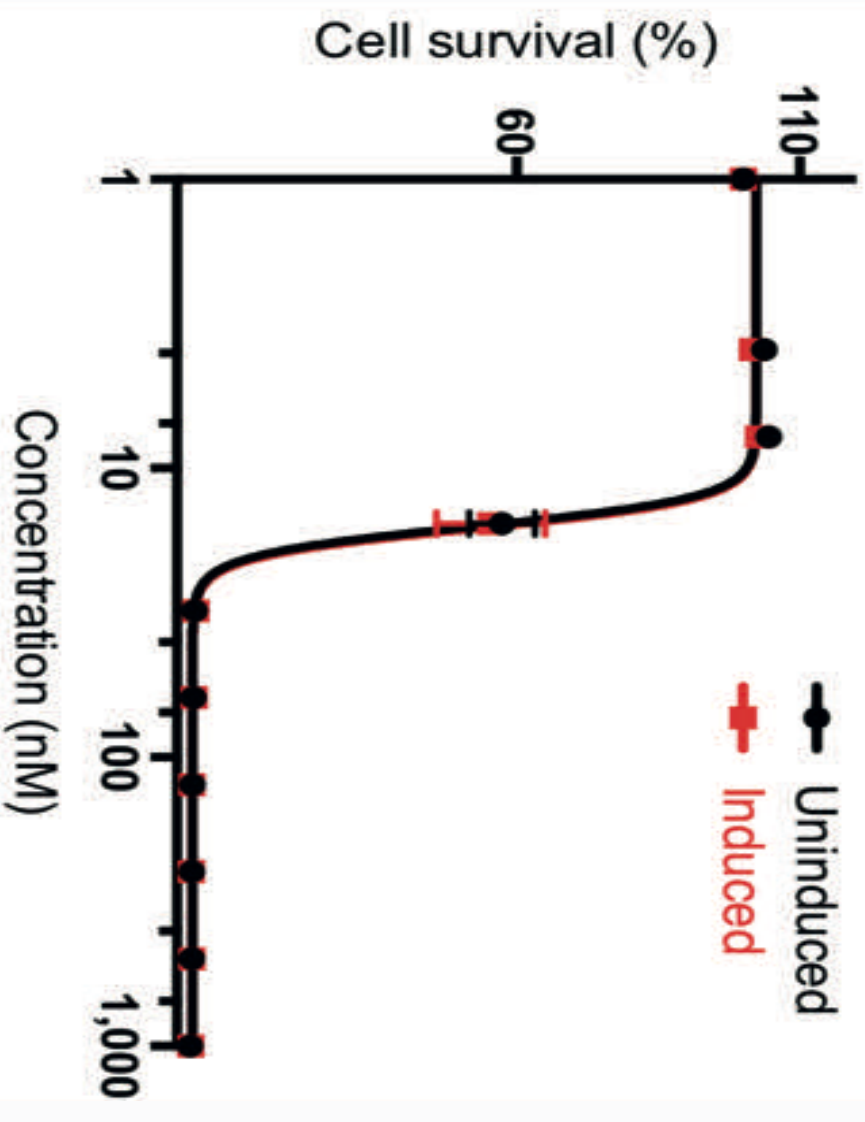

Supplement: supp_RA120.012355_157778_3_supp_514944_q94r7g.pdf [file supp_RA120.012355_157778_3_supp_514944_q94r7g.pdf]
